# Supplementary material for: Gold-catalyzed dual C–C bond cleavage of biphenylenes bearing a pendant alkyne at ambient temperature
Source: Royal Society of Chemistry journal article supplement (doi:10.1039/d0ob01211d), 2020-01-01

## Supporting Information

### Gold-catalyzed dual C-C bond cleavage of biphenylenes bearing a pendant alkyne at ambient temperature

Hideaki Takano,<sup>a</sup> Sari Okazaki,<sup>§a</sup> Shun Nishibe,<sup>§a</sup> Takeharu Ito,<sup>a</sup> Natsumi Shiozawa,<sup>a</sup> Natsuhiko Sugimura,<sup>b</sup> Kyallo Stephen  
Kanyiva,<sup>c</sup> and Takanori Shibata<sup>\*a</sup>

<sup>a</sup> Department of Chemistry and Biochemistry, School of Advanced Science and Engineering, Waseda University, 3-4-1 Okubo, Shinjuku, Tokyo 169-8555, Japan

<sup>b</sup> Materials Characterization Central Laboratory, Waseda University, 3-4-1 Okubo, Shinjuku, Tokyo 169-8555, Japan

<sup>c</sup> Global Center of Science and Engineering, School of Advanced Science and Engineering, Waseda University, 3-4-1 Okubo, Shinjuku, Tokyo 169-8555, Japan

<sup>§</sup> Both authors equally contributed to this work

E-mail: tshibata@waseda.jp

## Table of Contents

|                                                                                                              |         |
|--------------------------------------------------------------------------------------------------------------|---------|
| 1) General information                                                                                       | S3      |
| 2) Experimental procedures                                                                                   | S3-S4   |
| 3) Structural analysis for <b>3aa</b> and <b>3aa-<sup>13</sup>C</b> by 2D NMR spectra                        | S5-S7   |
| 4) Computational details                                                                                     | S8      |
| 5) Characterization data for new compounds                                                                   | S9-S25  |
| 6) References                                                                                                | S26     |
| 7) Cartesian coordinates of stationary points optimized at M06/SDD for Au and M06/6-31G(d,p) for other atoms | S27-S40 |
| 8) <sup>1</sup> H NMR, <sup>13</sup> C NMR and <sup>19</sup> F NMR spectra for new compounds                 | S41-S85 |

## 1) General information

<sup>1</sup>H NMR spectra were recorded with JEOL ECX-500 (500 MHz) spectrometer. Chemical shift values for protons are reported in parts per million ( $\delta$ ) relative to internal standard tetramethylsilane (0.00 ppm). <sup>13</sup>C NMR spectra were obtained by JEOL ECX-500 (125 MHz) spectrometers and referenced to the internal solvent signals (central peak is 77.16 ppm in CDCl<sub>3</sub>). <sup>19</sup>F NMR spectra were obtained by JEOL ECX-500 (470.5 MHz) spectrometers and referenced to the external standard trifluoroacetic acid (76.55 ppm). 2D NMR spectra were recorded with Bruker AVANCE 600. Data are presented as follows: chemical shift, multiplicity (s = singlet, d = doublet, t = triplet, q = quartet, m = multiplet, dd = doublet of doublets), coupling constant in Hz, and area integration. HRMS were measured with a direct analysis in real time DART-orbitrap mass spectrometer.<sup>S1</sup> X-ray structure was obtained by a Rigaku R-Axis RAPID diffractometer. PTLC was performed with silica gel-precoated glass plates (Merck 60 GF254) prepared in author's laboratory. All reagents except for metal reagents were weighed and handled in air and backfilled under argon at room temperature. All reactions were performed under an argon atmosphere. Unless otherwise noted, organic compounds and solvents were purchased from Tokyo Kasei Co., Aldrich Inc., and other commercial suppliers and were used without further purification. Compounds **1** were synthesized by reported procedures.<sup>S2</sup>

## 2) Experimental procedures

### A) General procedure for gold-catalyzed skeletal rearrangement

AuCl<sub>3</sub> (0.005 mmol), AgSbF<sub>6</sub> (0.015 mmol), and **1** (0.05 mmol) were placed in a Schlenk tube, which was then evacuated and backfilled with argon (x3). To the reaction vessel was added dehydrated DCE (0.5 mL, pretreated by argon bubbling for 30 sec). The solution was then stirred at room temperature and, after **1** was completely consumed as judged by TLC, the solvent was evaporated to dryness. The obtained crude products were purified by PTLC to give products **3**.

### B) Preparation of compound **1aa**-<sup>13</sup>C and <sup>13</sup>C-labeled experiment

Compound **1aa**-<sup>13</sup>C was synthesized from 2-(biphenylen-1-yl)benzaldehyde and <sup>13</sup>C-labeled benzyl phenyl sulfone by a reported procedure.<sup>S2</sup> <sup>13</sup>C-labeled Benzyl phenyl sulfone was synthesized from benzoic acid- $\alpha$ -<sup>13</sup>C.<sup>S3</sup>

#### Experimental procedure for gold-catalyzed skeletal rearrangement of **1aa**-<sup>13</sup>C

AuCl<sub>3</sub> (0.005 mmol), AgSbF<sub>6</sub> (0.015 mmol), and **1aa**-<sup>13</sup>C (0.05 mmol) were placed in a Schlenk tube, which was then evacuated and backfilled with argon (x3). To the reaction vessel was added dehydrated DCE (0.5 mL, pretreated by argon bubbling for 30 sec). The solution was then stirred at room temperature for 2.5 h and the solvent was evaporated to dryness. The obtained crude products were purified by PTLC to give products **3aa**-<sup>13</sup>C.

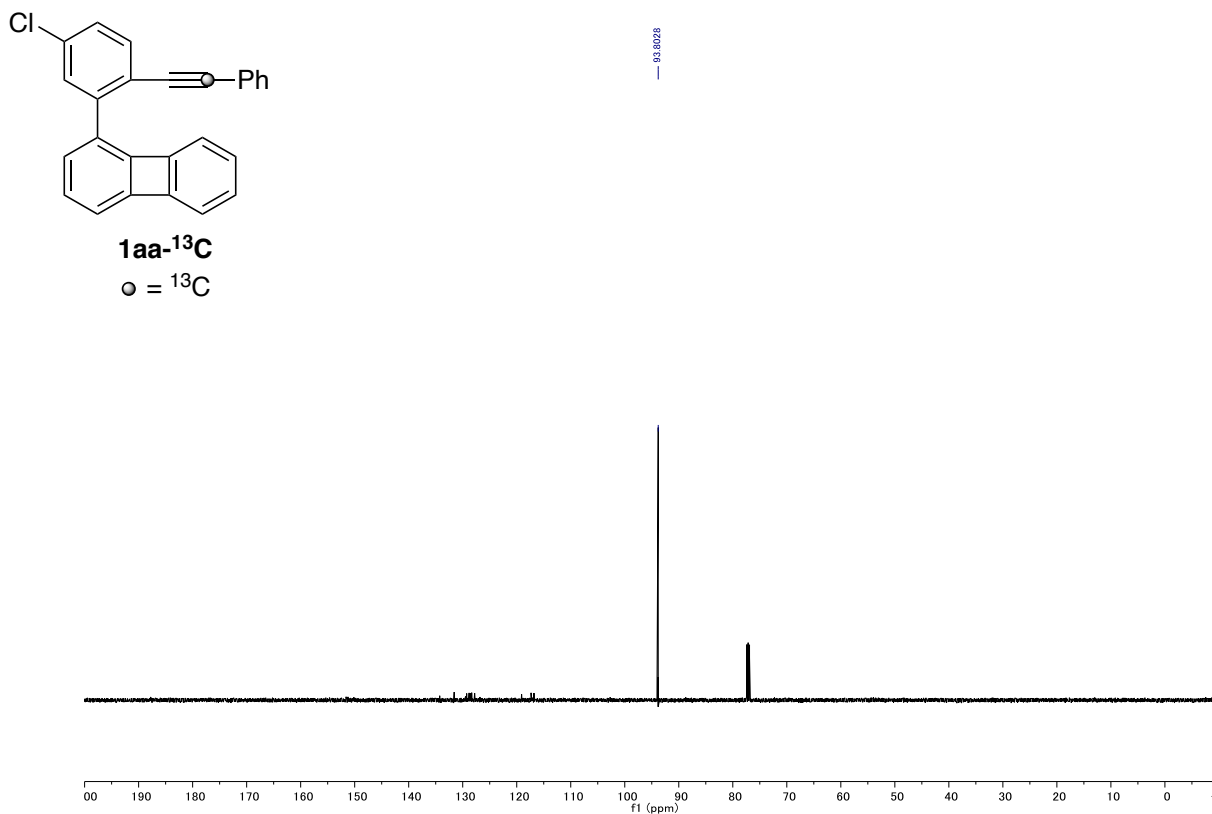

Figure S1. <sup>13</sup>C NMR spectrum of <sup>13</sup>C-1aa

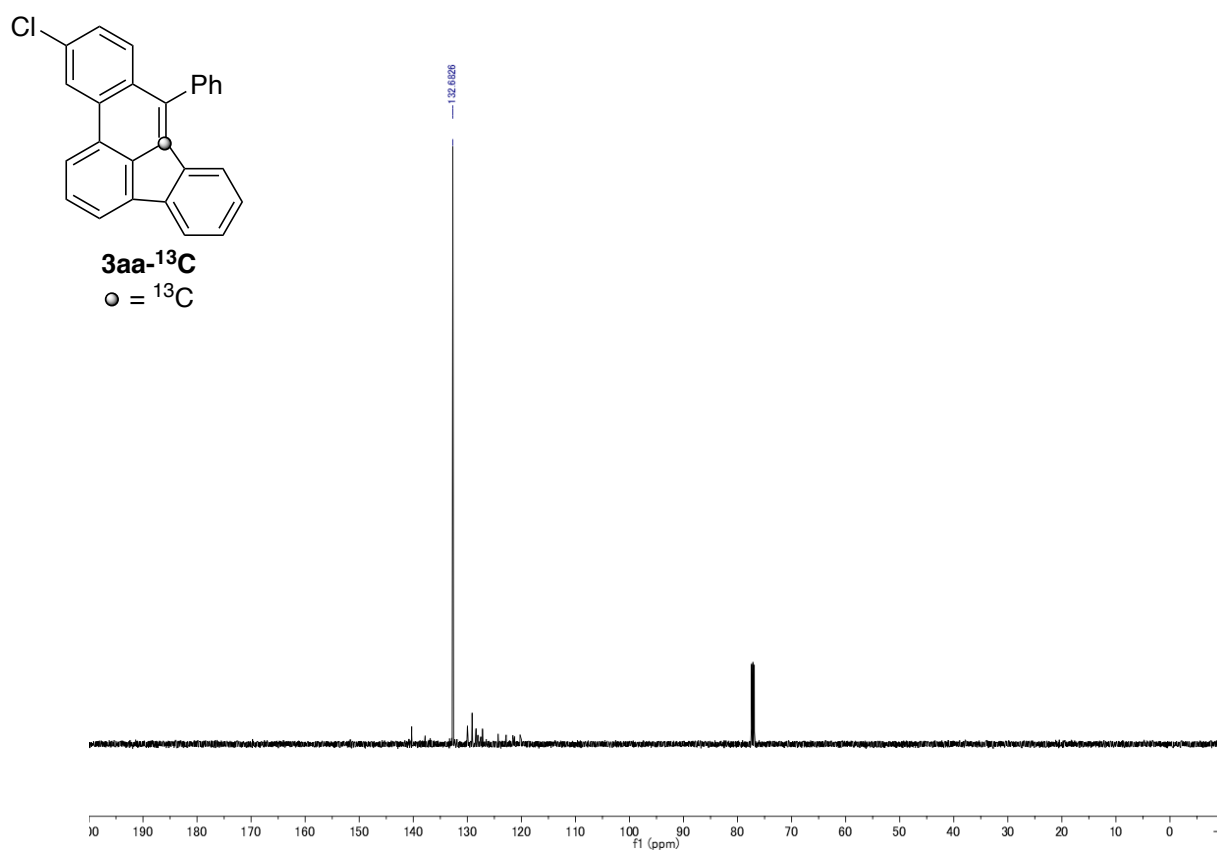

Figure S2. <sup>13</sup>C NMR spectrum of <sup>13</sup>C-3aa

### 3) Structural analysis for 3aa and 3aa-<sup>13</sup>C by 2D NMR spectra

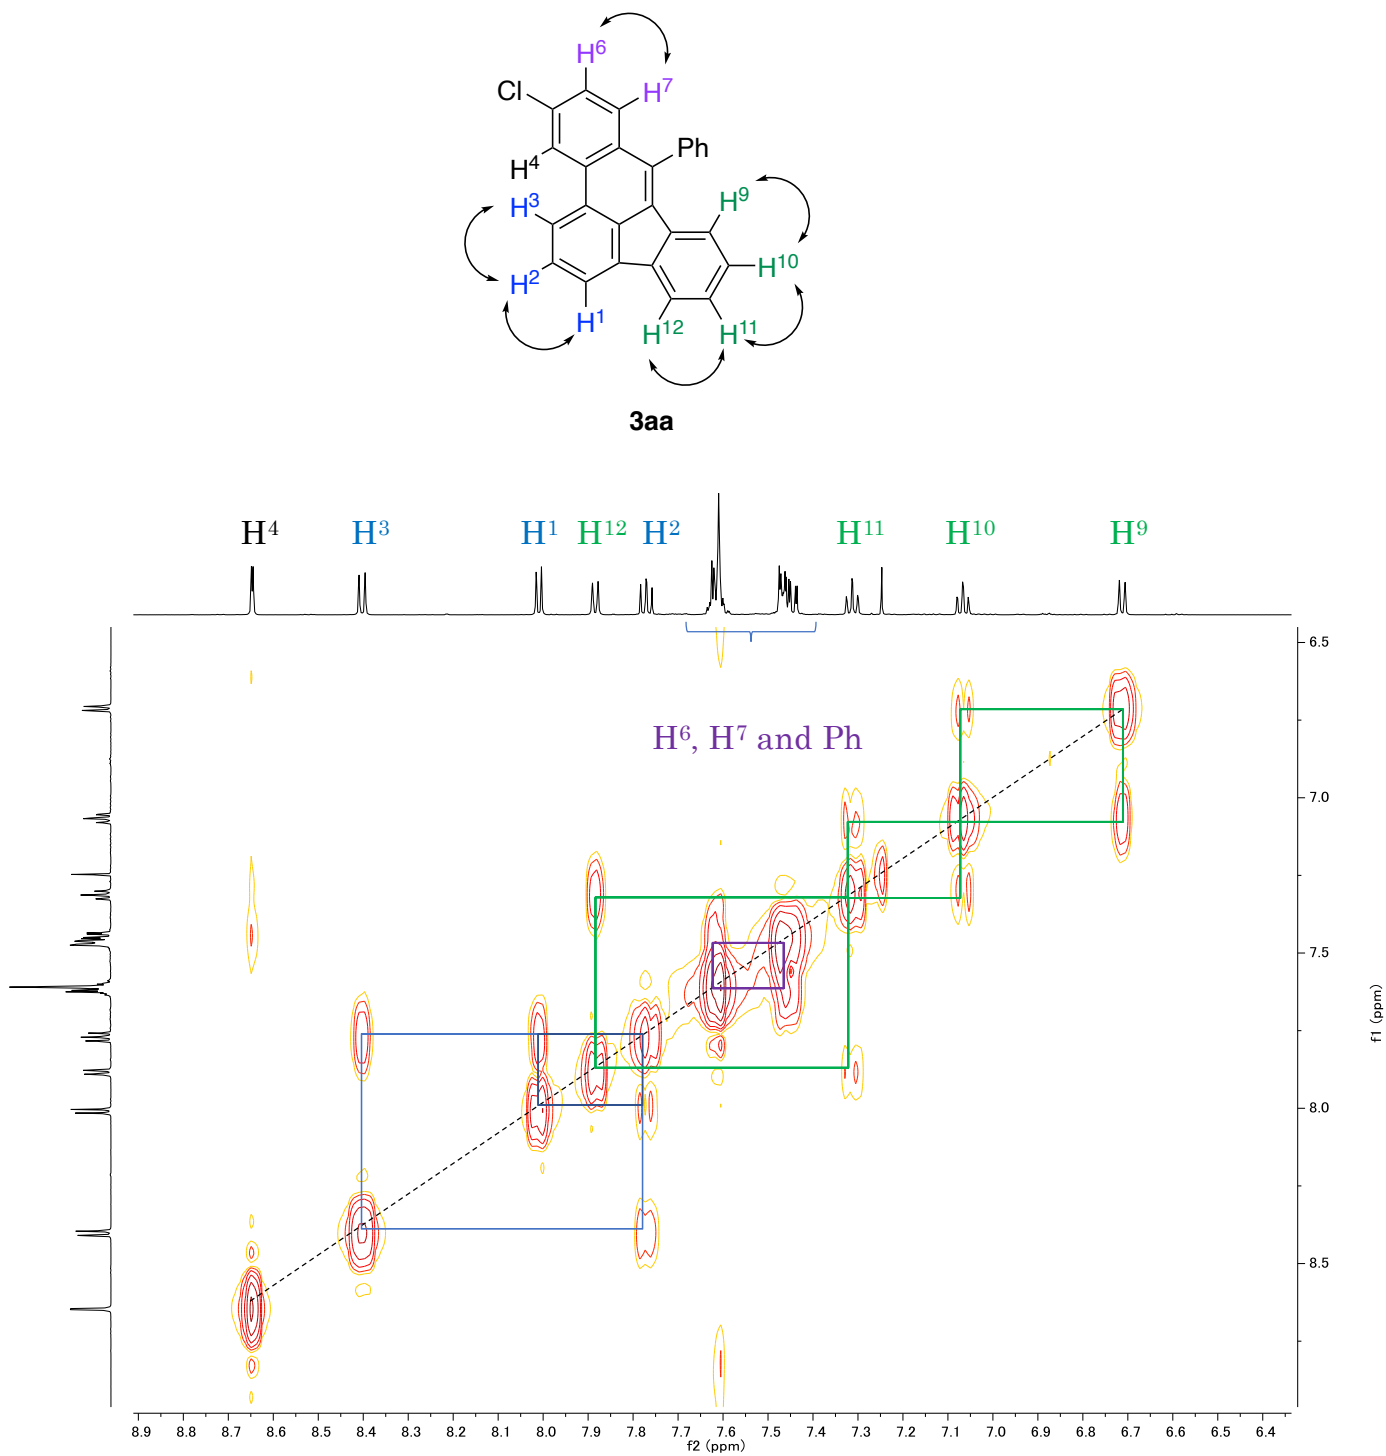

Figure S3. <sup>1</sup>H-<sup>1</sup>H Cosy spectrum of 3aa

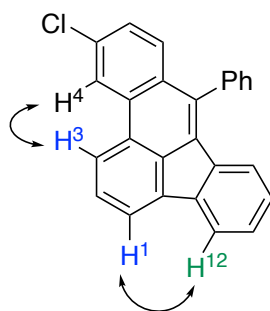

**3aa**

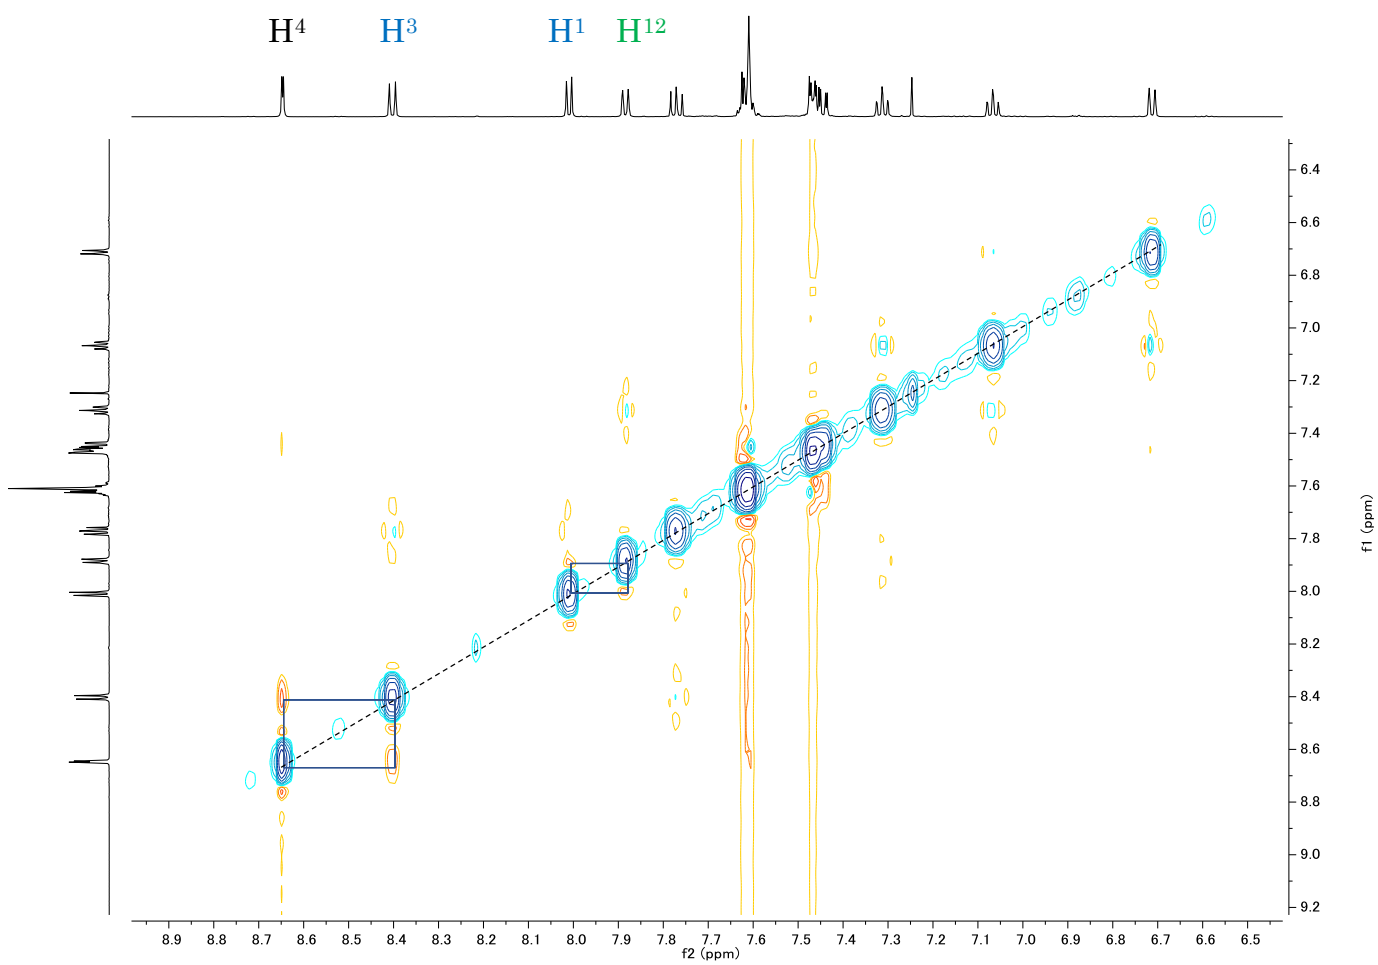

**Figure S4.** <sup>1</sup>H-<sup>1</sup>H NOESY spectrum of **3aa**

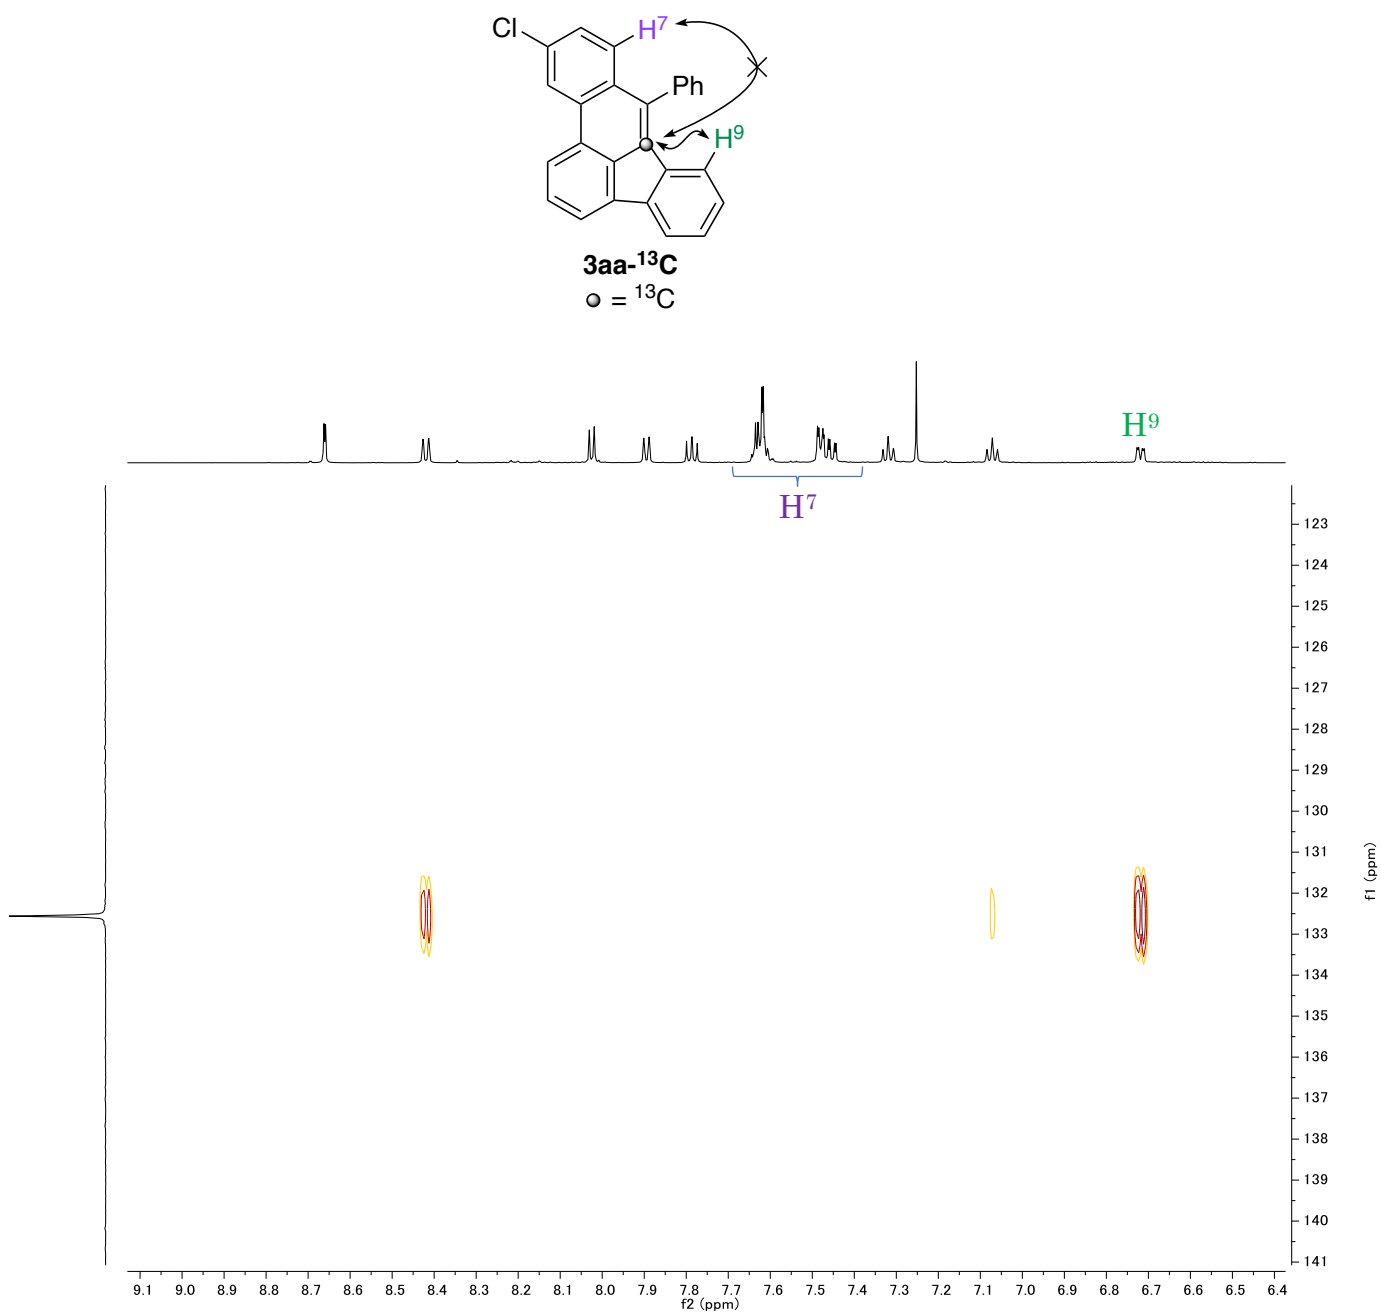

**Figure S5.** <sup>1</sup>H-<sup>13</sup>C HMBC spectrum of **3aa-<sup>13</sup>C**

#### 4) Computational details

All calculations were performed using the Gaussian 16 package.<sup>S4</sup> Geometry optimizations were carried out at the M06<sup>S5</sup> level of theory with a mixed basis set of SDD<sup>S6</sup> for Au atom and 6-31G(d,p) for other atoms. Vibration frequency was computed at the same level of theory to confirm whether the structures are minima (no imaginary frequencies) or transition states (only one imaginary frequency). Energies of optimized structures were calculated by single point calculation at the same level of theory with solvation effects (dichloroethane,  $\epsilon = 10.125000$ ) with a mixed basis set of def2-TZVPPD<sup>S7</sup> for Au atom and 6-311G++(d,p) for other atoms using IEFPCM model.<sup>S8</sup> The molecular geometries of the transition states were first estimated by the Reaction plus Pro software package (Software to optimize reaction paths along the user's expected ones, HPC Systems Inc., <http://www.hpc.co.jp/chem/react1.html> (written in Japanese)), based on the nudged elastic band (NEB) method,<sup>S9</sup> and subsequently re-optimized by the Synchronous Transit-guided Quasi-Newton method with the keyword QST2 or QST3.<sup>S10</sup> Transition-state structures were confirmed to connect corresponding reactants and products through the use of intrinsic reaction coordination (IRC) calculations.<sup>S11</sup>

#### A) Total electronic energy and free energy with solvation effects (dichloroethane, $\epsilon = 10.125000$ ) using SMD model

**Table S1. Total energy  $E$  and Gibbs free energy  $G$  of 1ah at 298K**

|            | $E$ (Hartree) | $G$ (Hartree) |
|------------|---------------|---------------|
| <b>1ab</b> | -999.812361   | -999.519261   |

**Table S2. Total energies  $E$  and Gibbs free energies  $G$  of Au-P(OMe)<sub>3</sub> system at 298K**

|                                           | $E$ (Hartree) | $G$ (Hartree) |              | $E$ (Hartree) | $G$ (Hartree) |
|-------------------------------------------|---------------|---------------|--------------|---------------|---------------|
| <b>Au[P(OMe)<sub>3</sub>]<sup>+</sup></b> | -822.315184   | -822.229057   | <b>Int1</b>  | -1822.180108  | -1821.784996  |
| <b>TS1</b>                                | -1822.154653  | -1821.758565  | <b>TS1'</b>  | -1822.146586  | -1821.752862  |
| <b>Int2</b>                               | -1822.170887  | -1821.773799  | <b>Int2'</b> | -1822.169774  | -1821.772403  |
| <b>TS2</b>                                | -1822.1492    | -1821.752852  | <b>TS2'</b>  | -1822.152332  | -1821.759749  |
| <b>Int3</b>                               | -1822.25141   | -1821.850651  | <b>Int3'</b> | -1822.19304   | -1821.794932  |
| <b>TS3</b>                                | -1822.247893  | -1821.848197  | <b>TS3'</b>  | -1822.179865  | -1821.78605   |
| <b>Int4</b>                               | -1822.317346  | -1821.916377  | <b>Int4'</b> | -1822.240667  | -1821.843467  |



## 5) Characterization data for new compounds

### 1-(5-Chloro-2-(phenylethynyl)phenyl)biphenylene (1aa)

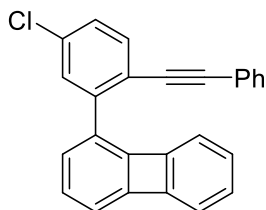

Isolated by flash column chromatography (hexane,  $R_f = 0.40$ ). The title compound was obtained as a yellow solid (100.5 mg, 92%); mp 113-114 °C;  $^1\text{H NMR}$   $\delta$  7.56 (d,  $J = 8.3$  Hz, 1H), 7.46 (d,  $J = 2.2$  Hz, 1H), 7.32-7.22 (m, 6H), 7.05 (dd,  $J = 8.4, 0.6$  Hz, 1H), 6.85 (dd,  $J = 8.4, 6.8$  Hz, 1H), 6.77-6.73 (m, 1H), 6.70-6.66 (m, 3H), 6.60-6.58 (m, 1H);  $^{13}\text{C NMR}$   $\delta$  151.6, 151.2, 151.2, 150.1, 141.6, 134.4, 134.3, 131.6, 129.5, 129.3, 128.8, 128.6, 128.6, 128.5, 128.5, 128.4, 127.8, 123.2, 120.1, 119.1, 117.3, 116.8, 93.8, 88.1; HRMS (DART, positive):  $m/z$  calcd. for  $\text{C}_{26}\text{H}_{19}\text{ClN}^+ [\text{M}+\text{NH}_4]^+$  380.1201, found 380.1190.

### 1-(2-(Phenylethynyl)phenyl)biphenylene (1ab)

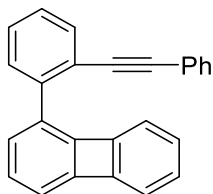

Isolated by PTLC (hexane/EtOAc = 9/1,  $R_f = 0.60$ ). The title compound was obtained as yellow oil (152.8 mg, 93%);  $^1\text{H NMR}$   $\delta$  7.65-7.63 (m, 1H), 7.47-7.45 (m, 1H), 7.40-7.29 (m, 4H), 7.26-7.22 (m, 3H), 7.09-7.07 (m, 1H), 6.84 (dd,  $J = 8.4, 6.8$  Hz, 1H), 6.74-6.64 (m, 4H), 6.58-6.57 (m, 1H);  $^{13}\text{C NMR}$   $\delta$  152.0, 151.3, 151.2, 149.9, 140.1, 133.1, 131.6, 130.8, 129.7, 128.8, 128.6, 128.4, 128.3, 128.3, 128.3, 128.2, 127.6, 123.5, 121.6, 119.0, 117.2, 116.4, 93.0, 89.1; HRMS (DART, positive):  $m/z$  calcd. for  $\text{C}_{26}\text{H}_{20}\text{N}^+ [\text{M}+\text{NH}_4]^+$  346.1590, found 346.1588.

### 1-(5-Fluoro-2-(phenylethynyl)phenyl)biphenylene (1ac)

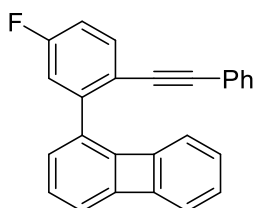

Isolated by PTLC (hexane/DCM = 9/1,  $R_f = 0.45$ ). The title compound was obtained as a yellow solid (87.1 mg, 83%); mp 91-92 °C;  $^1\text{H NMR}$   $\delta$  7.62 (dd,  $J = 8.6, 5.8$  Hz, 1H), 7.28 (dd,  $J = 7.5, 2.2$

Hz, 2H), 7.26-7.23 (m, 3H), 7.18 (dd,  $J = 9.5, 2.7$  Hz, 1H), 7.07-7.02 (m, 2H), 6.85 (dd,  $J = 8.4, 6.8$  Hz, 1H), 6.76-6.73 (m, 1H), 6.70-6.66 (m, 3H), 6.61-6.59 (m, 1H);  $^{13}\text{C}$  NMR  $\delta$  162.5 (d,  $J = 250.0$  Hz), 151.6, 151.2, 151.2, 150.1, 142.4 (d,  $J = 8.3$  Hz), 135.0 (d,  $J = 8.6$  Hz), 131.5, 129.7, 129.7, 129.3, 128.6, 128.5, 128.3, 128.3, 123.4, 119.1, 117.8 (d,  $J = 3.3$  Hz), 117.3, 116.8, 115.7 (d,  $J = 22.4$  Hz), 115.0 (d,  $J = 22.0$  Hz), 92.6 (d,  $J = 1.7$  Hz), 88.1;  $^{19}\text{F}$  NMR  $\delta$  -111.0; HRMS (DART, positive):  $m/z$  calcd. for  $\text{C}_{26}\text{H}_{16}\text{F}^+ [\text{M} + \text{H}]^+$  347.1231, found 347.1227.

### 1-(4-Fluoro-2-(phenylethynyl)phenyl)biphenylene (1ad)

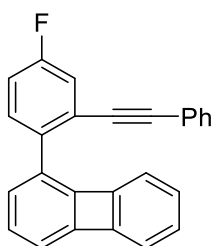

Isolated by PTLTC (hexane/EtOAc = 9/1,  $R_f = 0.55$ ). The title compound was obtained as a yellow solid (71.9 mg, 70%); mp 88-89 °C;  $^1\text{H}$  NMR  $\delta$  7.40 (dd,  $J = 8.6, 5.8$  Hz, 1H), 7.33 (dd,  $J = 9.2, 2.6$  Hz, 1H), 7.30-7.21 (m, 5H), 7.10-7.06 (m, 1H), 7.01 (d,  $J = 8.4$  Hz, 1H), 6.83 (dd,  $J = 8.4, 6.8$  Hz, 1H), 6.72 (dd,  $J = 7.0, 0.9$  Hz, 1H), 6.68-6.64 (m, 3H), 6.56-6.54 (m, 1H);  $^{13}\text{C}$  NMR  $\delta$  161.8 (d,  $J = 247.7$  Hz), 151.8, 151.2, 151.2, 149.9, 136.4 (d,  $J = 3.3$  Hz), 131.7, 130.4 (d,  $J = 8.6$  Hz), 129.8, 129.6, 128.6, 128.5, 128.4, 128.4, 128.4, 123.3 (d,  $J = 9.8$  Hz), 123.0, 119.4 (d,  $J = 22.7$  Hz), 118.9, 117.3, 116.5, 116.0 (d,  $J = 21.5$  Hz), 93.8, 88.0 (d,  $J = 3.0$  Hz);  $^{19}\text{F}$  NMR  $\delta$  -114.6; HRMS (DART, positive):  $m/z$  calcd. for  $\text{C}_{26}\text{H}_{19}\text{FN}^+ [\text{M} + \text{NH}_4]^+$  364.1496, found 364.1492.

### 1-(4-Chloro-2-(phenylethynyl)phenyl)biphenylene (1ae)

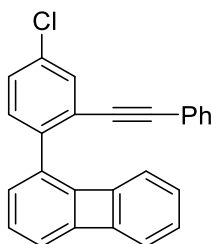

Isolated by flash column chromatography (hexane/DCM = 4/1,  $R_f = 0.50$ ). The title compound was obtained as a yellow solid (96.1mg, 87%); mp 115-116 °C;  $^1\text{H}$  NMR  $\delta$  7.63 (dd,  $J = 2.1, 0.4$  Hz, 1H), 7.40-7.38 (m, 1H), 7.35 (dd,  $J = 8.3, 2.1$  Hz, 1H), 7.30-7.22 (m, 5H), 7.02 (dd,  $J = 8.4, 0.7$  Hz, 1H), 6.84 (dd,  $J = 8.5, 6.8$  Hz, 1H), 6.75-6.72 (m, 1H), 6.69-6.65 (m, 3H), 6.57-6.55 (m, 1H);  $^{13}\text{C}$  NMR  $\delta$  151.7, 151.2, 151.2, 150.0, 138.5, 133.4, 132.6, 131.7, 130.0, 129.7, 129.4, 128.8, 128.6, 128.5, 128.5, 128.5, 128.4, 123.2, 123.0, 119.0, 117.3, 116.6, 94.1, 87.8; HRMS (DART, positive):  $m/z$  calcd. for  $\text{C}_{26}\text{H}_{19}\text{ClN}^+ [\text{M} + \text{NH}_4]^+$  380.1201, found 380.1198.

### 1-(4-Methoxy-2-(phenylethynyl)phenyl)biphenylene (1af)

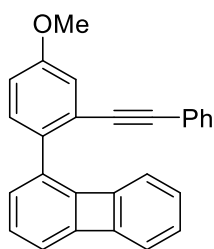

Isolated by flash column chromatography (hexane/EtOAc = 9/1,  $R_f$  = 0.65). The title compound was obtained as a yellow solid (160.8mg, 90%); mp 96-97 °C;  $^1\text{H}$  NMR  $\delta$  7.38 (d,  $J$  = 8.6 Hz, 1H), 7.32-7.30 (m, 2H), 7.26-7.24 (m, 3H), 7.15 (d,  $J$  = 2.8 Hz, 1H), 7.06 (d,  $J$  = 8.4 Hz, 1H), 6.96 (dd,  $J$  = 8.7, 2.6 Hz, 1H), 6.82 (dd,  $J$  = 8.5, 6.8 Hz, 1H), 6.73-6.70 (m, 1H), 6.67-6.62 (m, 3H), 6.57 (d,  $J$  = 6.8 Hz, 1H), 3.87 (s, 3H);  $^{13}\text{C}$  NMR  $\delta$  158.9, 152.1, 151.3, 151.1, 149.6, 132.9, 131.6, 130.6, 130.0, 129.8, 128.4, 128.3, 128.3, 128.2, 123.4, 122.5, 118.8, 117.2, 117.1, 116.1, 115.6, 92.7, 89.1, 55.6 (a pair of peaks at the aromatic region was overlapped); HRMS (DART, positive):  $m/z$  calcd. for  $\text{C}_{27}\text{H}_{22}\text{NO}^+$  [ $\text{M}+\text{NH}_4$ ] $^+$  376.1696, found 376.1692.

### 1-(3-Fluoro-2-(phenylethynyl)phenyl)biphenylene (1ag)

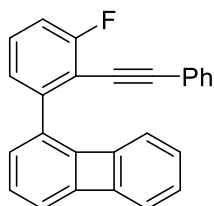

Isolated by PTLC (hexane/EtOAc = 9/1,  $R_f$  = 0.50). The title compound was obtained as a yellow solid (145.8 mg, 84%); mp 68-69 °C;  $^1\text{H}$  NMR  $\delta$  7.37-7.32 (m, 3H), 7.27-7.23 (m, 4H), 7.13-7.09 (m, 1H), 7.06 (dd,  $J$  = 8.4, 0.6 Hz, 1H), 6.85 (dd,  $J$  = 8.4, 6.8 Hz, 1H), 6.76-6.73 (m, 1H), 6.70-6.66 (m, 3H), 6.59-6.58 (m, 1H);  $^{13}\text{C}$  NMR  $\delta$  163.4 (d,  $J$  = 250.9 Hz), 151.7, 151.3, 151.2, 150.1, 142.3 (d,  $J$  = 1.2 Hz), 131.7, 129.7 (d,  $J$  = 2.7 Hz), 129.5, 129.4 (d,  $J$  = 8.8 Hz), 128.6, 128.5 (d,  $J$  = 2.1 Hz), 128.4, 128.3, 124.3 (d,  $J$  = 3.4 Hz), 123.2, 119.1, 117.3, 116.7, 114.5 (d,  $J$  = 21.5 Hz), 110.7 (d,  $J$  = 16.4 Hz), 98.4 (d,  $J$  = 4.1 Hz), 82.1 (a pair of peaks at the aromatic region was overlapped);  $^{19}\text{F}$  NMR  $\delta$  -108.4; HRMS (DART, positive):  $m/z$  calcd. for  $\text{C}_{26}\text{H}_{16}\text{F}^+$  [ $\text{M}+\text{H}$ ] $^+$  347.1231, found 347.1225.

### 1-(1-(Phenylethynyl)naphthalen-2-yl)biphenylene (1ah)

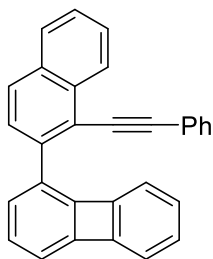

Isolated by flash column chromatography (hexane/EtOAc = 9/1,  $R_f$  = 0.60). The title compound was obtained as a yellow solid (95.0 mg, 83%); mp 123-125 °C;  $^1\text{H}$  NMR  $\delta$  8.59 (d,  $J$  = 8.3 Hz, 1H), 7.88 (dd,  $J$  = 8.2, 2.2 Hz, 2H), 7.66-7.54 (m, 3H), 7.42-7.40 (m, 2H), 7.30-7.27 (m, 3H), 7.19 (d,  $J$  = 8.3 Hz, 1H), 6.89 (dd,  $J$  = 8.4, 6.8 Hz, 1H), 6.75-6.64 (m, 4H), 6.55 (d,  $J$  = 6.8 Hz, 1H);  $^{13}\text{C}$  NMR  $\delta$  152.1, 151.4, 151.2, 150.5, 138.7, 133.8, 132.6, 131.6, 131.2, 129.9, 128.7, 128.5, 128.4, 128.4, 128.4, 128.3, 127.3, 126.9, 126.7, 126.6, 123.7, 119.2, 118.5, 117.2, 116.4, 98.6, 87.1 (a pair of peaks at the aromatic region was overlapped); HRMS (DART, positive):  $m/z$  calcd. for  $\text{C}_{30}\text{H}_{22}\text{N}^+$  [ $\text{M}+\text{NH}_4$ ] $^+$  396.1747, found 396.1744.

### 1-(5-Chloro-2-(4-methylphenylethynyl)phenyl)biphenylene (1ba)

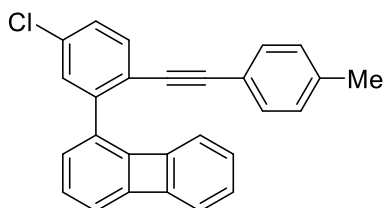

Isolated by flash column chromatography (hexane,  $R_f$  = 0.25). The title compound was obtained as a yellow solid (127.1 mg, 68%); mp 137-138 °C;  $^1\text{H}$  NMR  $\delta$  7.54 (d,  $J$  = 8.3 Hz, 1H), 7.45 (d,  $J$  = 2.2 Hz, 1H), 7.29 (dd,  $J$  = 8.3, 2.2 Hz, 1H), 7.17 (d,  $J$  = 8.1 Hz, 2H), 7.08-7.02 (m, 3H), 6.83 (dd,  $J$  = 8.3, 6.8 Hz, 1H), 6.86-6.81 (m, 1H), 6.77-6.71 (m, 3H), 6.60-6.55 (m, 1H), 2.31 (s, 3H);  $^{13}\text{C}$  NMR  $\delta$  151.6, 151.3, 151.2, 150.1, 141.4, 138.6, 134.2, 131.5, 129.5, 129.3, 129.1, 128.8, 128.6, 128.5, 128.5, 127.7, 120.3, 120.1, 119.1, 117.3, 116.8, 94.1, 87.5, 21.6 (a pair of peaks at the aromatic region was overlapped); HRMS (DART, positive):  $m/z$  calcd. For  $\text{C}_{27}\text{H}_{21}\text{ClN}^+$  [ $\text{M}+\text{NH}_4$ ] $^+$  394.1357, found 394.1350.

### 1-(5-Chloro-2-(4-methoxyphenylethynyl)phenyl)biphenylene (1ca)

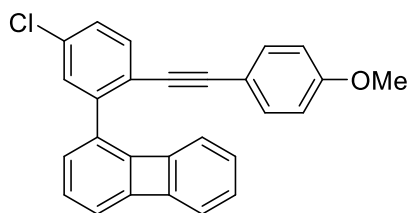

Isolated by flash column chromatography (hexane/EtOAc = 9/1, R<sub>f</sub> = 0.60). The title compound was obtained as a yellow solid (126.1 mg, 68%); mp 129-130 °C; <sup>1</sup>H NMR δ 7.52 (d, *J* = 8.3 Hz, 1H), 7.44 (d, *J* = 2.2 Hz, 1H), 7.28 (dd, *J* = 8.3, 2.2 Hz, 1H), 7.21 (d, *J* = 8.9 Hz, 2H), 7.04 (d, *J* = 8.4 Hz, 1H), 6.83 (dd, *J* = 8.4, 6.9 Hz, 1H), 6.79-6.71 (m, 3H), 6.71-6.62 (m, 3H), 6.58 (d, *J* = 6.9 Hz, 1H), 3.77 (s, 3H); <sup>13</sup>C NMR δ 159.8, 151.7, 151.2, 151.2, 150.1, 141.3, 134.0, 134.0, 133.0, 129.6, 129.3, 128.7, 128.6, 128.5, 128.5, 127.7, 120.5, 119.1, 117.3, 116.7, 115.3, 114.0, 94.0, 86.9, 55.4; HRMS (DART, positive): *m/z* calcd. For C<sub>27</sub>H<sub>18</sub>ClO<sup>+</sup> [M+H]<sup>+</sup> 393.1041, found 393.1035.

### 1-(5-Chloro-2-(4-chlorophenylethynyl)phenyl)biphenylene (1da)

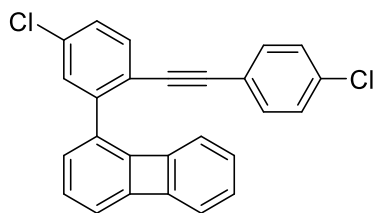

Isolated by flash column chromatography (hexane, R<sub>f</sub> = 0.50). The title compound was obtained as a yellow solid (125.4 mg, 63%); mp 161-162 °C; <sup>1</sup>H NMR δ 7.55 (d, *J* = 8.3 Hz, 1H), 7.46 (d, *J* = 2.1 Hz, 1H), 7.31 (dd, *J* = 8.3, 2.2 Hz, 1H), 7.22-7.15 (m, 4 H), 6.99 (d, *J* = 8.4 Hz, 1H), 6.85 (dd, *J* = 8.4, 6.8 Hz, 1H), 6.77-6.73 (m, 1H), 6.72-6.64 (m, 3H), 6.59-6.54 (m, 1H); <sup>13</sup>C NMR δ 151.6, 151.2, 150.2, 141.7, 134.7, 134.5, 134.1, 132.8, 129.3, 129.2, 128.9, 128.7, 128.6, 128.6, 127.8, 121.7, 119.8, 119.2, 117.4, 116.8, 92.7, 89.0 (two pairs of peaks at the aromatic region were overlapped); HRMS (DART, positive): *m/z* calcd. For C<sub>26</sub>H<sub>18</sub>Cl<sub>2</sub>N<sup>+</sup> [M+NH<sub>4</sub>]<sup>+</sup> 414.0811, found 414.0805.

### 1-(2-([1,1'-Biphenyl]-4-ylethynyl)-5-chlorophenyl)biphenylene (1ea)

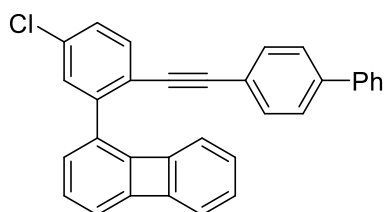

Isolated by flash column chromatography (hexane/DCM = 10/1, Rf = 0.20). The title compound was obtained as a yellow solid (72.4 mg, 33%); mp 136-137 °C;  $^1\text{H}$  NMR  $\delta$  7.59-7.54 (m, 3H), 7.50-7.46 (m, 3H), 7.45-7.41 (m, 2H), 7.36-7.30 (m, 4H), 7.06 (d,  $J$  = 8.4 Hz, 1H), 6.87 (dd,  $J$  = 8.5, 6.8 Hz, 1H), 6.78-7.64 (m, 1H), 6.73-6.67 (m, 3H), 6.63-6.58 (m, 1H);  $^{13}\text{C}$  NMR  $\delta$  151.7, 151.3, 151.2, 150.2, 141.6, 141.1, 140.5, 134.4, 134.2, 132.0, 129.5, 129.3, 129.0, 128.8, 128.6, 128.6, 128.6, 127.8, 127.8, 127.1, 127.0, 122.1, 120.2, 119.2, 117.4, 116.8, 93.8, 88.8; HRMS (DART, positive):  $m/z$  calcd. For  $\text{C}_{32}\text{H}_{20}\text{Cl}^+$   $[\text{M}+\text{H}]^+$  439.1248, found 439.1245.

### 1-(5-Chloro-2-(4-trifluoromethylphenylethynyl)phenyl)biphenylene (1fa)

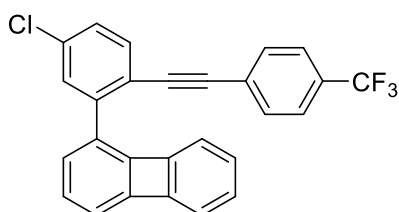

Isolated by flash column chromatography (hexane, Rf = 0.25). The title compound was obtained as a yellow solid (166.7 mg, 78%); mp 129-130 °C;  $^1\text{H}$  NMR  $\delta$  7.58 (d,  $J$  = 8.3 Hz, 1H), 7.51-7.45 (m, 3H), 7.35 (s, 1H), 7.35-7.30 (m, 2H), 6.98 (d,  $J$  = 8.4, 1H), 6.86 (dd,  $J$  = 8.4, 6.8 Hz, 1H), 6.80-6.73 (m, 1H), 6.73-6.65 (m, 3H), 6.60-6.52 (m, 1H);  $^{13}\text{C}$  NMR  $\delta$  151.6, 151.2, 151.2, 150.2, 142.0, 135.1, 134.3, 131.7, 130.0 (q,  $J$  = 32.8 Hz), 129.2, 129.2, 129.0, 128.7, 128.7, 128.6, 127.9, 127.0 (q,  $J$  = 1.5 Hz), 125.3 (q,  $J$  = 3.7 Hz), 124.0 (q,  $J$  = 274.5 Hz), 119.4, 119.2, 117.4, 116.9, 92.3, 90.4;  $^{19}\text{F}$  NMR  $\delta$  -62.7; HRMS (DART, positive):  $m/z$  calcd. For  $\text{C}_{27}\text{H}_{18}\text{ClF}_3\text{N}^+$   $[\text{M}+\text{NH}_4]^+$  448.1074, found 448.1073.

### 1-(5-Chloro-2-(3-trifluoromethylphenylethynyl)phenyl)biphenylene (1ga)

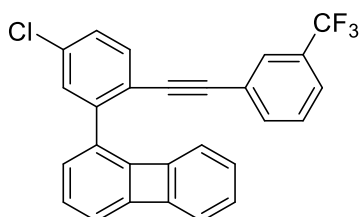

Isolated by flash column chromatography (hexane, Rf = 0.20). The title compound was obtained as a yellow solid (177.3 mg, 82%); mp 68-69 °C;  $^1\text{H}$  NMR  $\delta$  7.57 (d,  $J$  = 8.3 Hz, 1H), 7.52-7.46 (m, 3H), 7.42 (d,  $J$  = 7.8 Hz, 1H), 7.38-7.31 (m, 2H), 6.97 (d,  $J$  = 8.4 Hz, 1H), 6.86 (dd,  $J$  = 8.4, 6.8 Hz, 1H), 6.78-6.73 (m, 1H), 6.72-6.64 (m, 3H), 6.57 (dd,  $J$  = 6.8, 0.8 Hz, 1H);  $^{13}\text{C}$  NMR  $\delta$  151.6, 151.2, 151.2, 150.3, 142.0, 135.0, 134.5, 134.2, 131.0 (q,  $J$  = 32.7 Hz), 129.2, 129.1, 128.9, 128.8, 128.7, 128.7, 128.5, 128.4 (q,  $J$  = 3.8 Hz), 127.9, 124.9 (q,  $J$  = 3.8 Hz), 124.1, 123.8 (q,  $J$  = 277.0 Hz), 119.5,

119.3, 117.5, 116.9, 92.1, 89.6;  $^{19}\text{F}$  NMR  $\delta$  -62.8; HRMS (DART, positive):  $m/z$  calcd. For  $\text{C}_{27}\text{H}_{18}\text{ClF}_3\text{N}^+ [\text{M}+\text{NH}_4]^+$  448.1074, found 448.1071.

### 1-(5-Chloro-2-(3-methylphenylethynyl)phenyl)biphenylene (1ha)

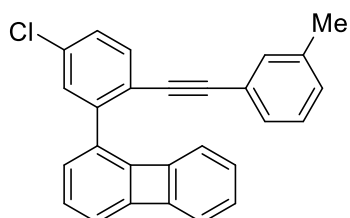

Isolated by PTLC (hexane,  $R_f = 0.30$ ). The title compound was obtained as a yellow solid (85.4 mg, 76%); mp 98-99 °C;  $^1\text{H}$  NMR  $\delta$  7.54 (d,  $J = 8.3$  Hz, 1H), 7.45 (d,  $J = 2.2$  Hz, 1H), 7.29 (dd,  $J = 8.3$ , 2.2 Hz, 1H), 7.14-7.05 (m, 4H), 7.04-7.01 (m, 1H), 6.84 (dd,  $J = 8.4$ , 6.8 Hz, 1H), 6.77-6.72 (m, 1H), 6.70-6.64 (m, 3H), 6.60-6.57 (m, 1H), 2.25 (s, 3H);  $^{13}\text{C}$  NMR  $\delta$  151.7, 151.3, 151.2, 150.2, 141.6, 138.0, 134.3, 134.2, 132.3, 129.5, 129.3, 129.3, 128.8, 128.6, 128.6, 128.5, 128.2, 127.8, 123.0, 120.2, 119.2, 117.3, 116.8, 94.8, 94.0, 87.7, 21.3; HRMS (DART, positive):  $m/z$  calcd. For  $\text{C}_{27}\text{H}_{21}\text{ClN}^+ [\text{M}+\text{NH}_4]^+$  394.1357, found 394.1353.

### 1-(5-Chloro-2-(pent-1-yn-1-yl)phenyl)biphenylene (1ia)

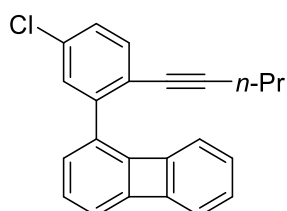

Isolated by PTLC (hexane,  $R_f = 0.45$ ). The title compound was obtained as yellow oil (72.2 mg, 73%);  $^1\text{H}$  NMR  $\delta$  7.44-7.38 (m, 2H), 7.23 (dd,  $J = 8.3$ , 2.2 Hz, 1H), 7.00 (d,  $J = 8.4$  Hz, 1H), 6.80 (dd,  $J = 8.4$ , 6.8 Hz, 1H), 6.76-6.70 (m, 2H), 6.67-6.60 (m, 2H), 6.56-6.53 (m, 1H), 2.23 (t,  $J = 7.0$  Hz, 2H), 1.49-1.39 (m, 2H), 0.90 (t,  $J = 7.4$  Hz, 3H);  $^{13}\text{C}$  NMR  $\delta$  151.7, 151.3, 151.2, 150.0, 141.4, 134.3, 133.5, 130.0, 129.3, 128.6, 128.4, 128.4, 128.3, 127.6, 120.9, 119.0, 117.1, 116.6, 95.2, 79.1, 21.8, 21.8, 13.6; HRMS (DART, positive):  $m/z$  calcd. For  $\text{C}_{23}\text{H}_{18}\text{Cl}^+ [\text{M}+\text{H}]^+$  329.1092, found 329.1087.

**5-Chloro-8-phenylbenzo[*b*]fluoranthene (3aa) and 2-chloro-6-phenylbenzo[3,4]cyclobuta[1,2-*c*]phenanthrene (4aa)**

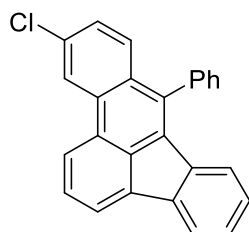

**3aa**

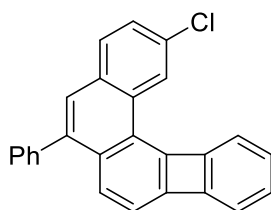

**4aa**

Separated by PTLC (hexane/toluene = 14/1,  $R_f$  = 0.40). The title compounds were obtained as a yellow solid (17.2 mg, **3aa:4aa** = 31:1 = 92%:3%);  $^1\text{H}$  NMR (**3aa**)  $\delta$  8.64 (d,  $J$  = 2.2 Hz, 1H), 8.39 (d,  $J$  = 8.1 Hz, 1H), 8.00 (d,  $J$  = 7.1 Hz, 1H), 7.88 (d,  $J$  = 7.5 Hz, 1H), 7.76 (dd,  $J$  = 8.1, 7.1 Hz, 1H), 7.63-7.59 (m, 4H), 7.47-7.43 (m, 3H), 7.32-7.29 (m, 1H), 7.08-7.05 (m, 1H), 6.71 (d,  $J$  = 7.7 Hz, 1H);  $^{13}\text{C}$  NMR (**3aa**)  $\delta$  140.8, 138.5, 137.8, 137.1, 135.9, 133.3, 132.8, 132.7, 132.2, 131.9, 130.0, 129.9, 129.1, 128.4, 128.4, 128.0, 127.5, 127.2, 126.5, 124.3, 122.8, 121.6, 121.3, 120.2; HRMS (DART, positive):  $m/z$  calcd. for  $\text{C}_{26}\text{H}_{19}\text{ClN}^+ [\text{M}+\text{NH}_4]^+$  380.1201, found 380.1195.

**11-Chloro-8-phenylbenzo[*b*]fluoranthene (2aa)**

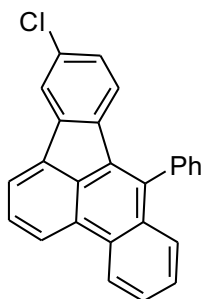

Isolated by short column (hexane/toluene = 14/1,  $R_f$  = 0.50). The title compound was obtained as a yellow solid (14.9 mg, 82%); mp 223-225 °C;  $^1\text{H}$  NMR  $\delta$  8.74 (d,  $J$  = 8.1 Hz, 1H), 8.55 (d,  $J$  = 8.2 Hz, 1H), 8.00 (d,  $J$  = 7.1 Hz, 1H), 7.86 (d,  $J$  = 2.0 Hz, 1H), 7.82-7.79 (m, 1H), 7.72-7.68 (m, 2H), 7.65-7.60 (m, 3H), 7.55-7.52 (m, 1H), 7.50-7.48 (m, 2H), 7.04-7.02 (m, 1H), 6.62 (d,  $J$  = 8.2 Hz, 1H);  $^{13}\text{C}$  NMR  $\delta$  142.5, 138.0, 137.0, 136.9, 135.9, 134.3, 133.8, 132.1, 131.4, 130.8, 130.0, 129.1, 128.6, 128.4, 128.2, 127.5, 127.3, 127.2, 127.0, 125.0, 123.2, 122.3, 121.5, 120.1; HRMS (DART, positive):  $m/z$  calcd. for  $\text{C}_{26}\text{H}_{19}\text{NCl}^+ [\text{M}+\text{NH}_4]^+$  380.1201, found 380.1198.



### 2-Chloro-6-phenylbenzo[3,4]cyclobuta[1,2-*c*]phenanthrene (4aa)

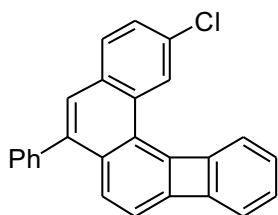

Isolated by PTLC (hexane/chloroform = 1/1,  $R_f$  = 0.50). The title compound was obtained as a yellow solid (17.2 mg, 95%); mp 244-246 °C;  $^1\text{H NMR}$   $\delta$  8.24 (d,  $J$  = 1.9 Hz, 1H), 7.64 (d,  $J$  = 8.4 Hz, 1H), 7.51-7.42 (m, 6H), 7.32 (d,  $J$  = 7.7 Hz, 1H), 7.29 (s, 1H), 7.02 (d,  $J$  = 6.9 Hz, 1H), 6.90 (d,  $J$  = 7.7 Hz, 1H), 6.83-6.80 (m, 1H), 6.77-6.73 (m, 1H), 6.61 (s, 1H);  $^{13}\text{C NMR}$   $\delta$  151.7, 151.7, 150.6, 147.7, 140.5, 140.3, 132.9, 132.2, 130.7, 130.0, 129.9, 129.4, 128.9, 128.6, 128.6, 128.5, 128.5, 128.0, 127.7, 126.3, 125.3, 118.5, 117.0, 116.8; HRMS (DART, positive):  $m/z$  calcd. for  $\text{C}_{26}\text{H}_{16}\text{Cl}^+$   $[\text{M}+\text{H}]^+$  363.0935, found 363.0930.

### 8-Phenylbenzo[*b*]fluoranthene (3ab) and 6-phenylbenzo[3,4]cyclobuta[1,2-*c*]phenanthrene (4ab)

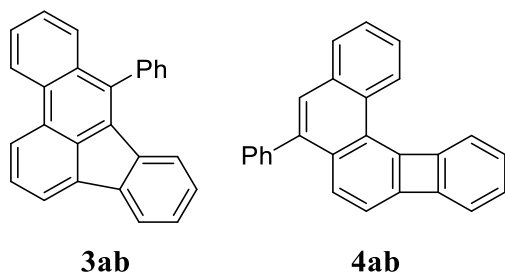

Separated by PTLC (hexane/toluene = 14/1,  $R_f$  = 0.60). The title compounds were obtained as a yellow solid (13.8 mg, **3ab**:**4ab** = 3:1 = 63%:21% ( $\text{P}(\text{OMe})_3$  was used as a ligand));  $^1\text{H NMR}$   $\delta$  8.73 (d,  $J$  = 8.1 Hz, 1H (**major**)), 8.51 (d,  $J$  = 8.1 Hz, 1H (**major**)), 8.30 (d,  $J$  = 8.0 Hz, 1H (**minor**)), 8.01 (d,  $J$  = 7.1 Hz, 1H (**major**)), 7.90 (d,  $J$  = 7.5 Hz, 1H (**major**)), 7.78 (dd,  $J$  = 8.1, 7.2 Hz, 1H (**major**)), 7.72-7.69 (m, 1H (**major**) + 1H (**minor**)), 7.68-7.66 (m, 1H (**major**)), 7.65-7.40 (m, 7H (**major**) + 7H (**minor**)), 7.33-7.29 (m, 1H (**major**) + 2H (**minor**)), 7.08-7.05 (m, 1H (**major**)), 7.02 (d,  $J$  = 6.7 Hz, 1H (**minor**)), 6.88 (d,  $J$  = 7.8 Hz, 1H (**minor**)), 6.80-6.76 (m, 1H (**minor**)), 6.74-6.71 (m, 1H (**minor**)), 6.59 (d,  $J$  = 6.5 Hz, 1H (**minor**));  $^{13}\text{C NMR}$  (**3ab**)  $\delta$  140.9, 138.8, 138.3, 137.1, 136.5, 134.4, 132.4, 131.9, 130.8, 130.1, 129.0, 128.5, 128.2, 128.2, 127.8, 127.5, 127.4, 127.0, 126.8, 124.3, 123.2, 121.6, 121.2, 119.7;  $^{13}\text{C NMR}$  (**4ab**)  $\delta$  152.3, 151.9, 150.4, 147.5, 140.9, 140.0, 132.9, 132.4, 130.1, 130.0, 128.9, 128.7, 128.4, 128.4, 128.2, 127.7, 127.6, 127.2, 126.5, 125.6, 125.5, 118.3, 116.6, 116.6; HRMS (DART, positive):  $m/z$  calcd. For  $\text{C}_{26}\text{H}_{17}^+$   $[\text{M}+\text{H}]^+$  329.1325, found 329.1323.

### 5-Fluoro-8-phenylbenzo[*b*]fluoranthene (3ac)

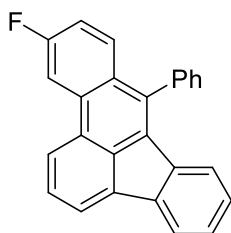

Isolated by PTLC (hexane,  $R_f = 0.30$ ). The title compound was obtained as a yellow solid (14.4 mg, 83%); mp 194-195 °C;  $^1\text{H NMR}$   $\delta$  8.38 (d,  $J = 8.2$  Hz, 1H), 8.31 (dd,  $J = 10.2, 2.6$  Hz, 1H), 8.02 (d,  $J = 7.1$  Hz, 1H), 7.90-7.88 (m, 1H), 7.77 (dd,  $J = 8.1, 7.2$  Hz, 1H), 7.68 (dd,  $J = 9.1, 5.8$  Hz, 1H), 7.64-7.60 (m, 3H), 7.49-7.47 (m, 2H), 7.33-7.29 (m, 1H), 7.26-7.22 (m, 1H), 7.09-7.05 (m, 1H), 6.72-6.70 (m, 1H);  $^{13}\text{C NMR}$   $\delta$  162.0 (d,  $J = 248.0$  Hz), 140.6, 138.6, 138.1, 137.2, 136.1 (d,  $J = 1.2$  Hz), 132.6 (d,  $J = 8.5$  Hz), 132.3, 131.9 (d,  $J = 2.5$  Hz), 131.2 (d,  $J = 1.8$  Hz), 130.7 (d,  $J = 8.9$  Hz), 130.0, 129.1, 128.4, 128.2, 127.9, 127.5, 126.9 (d,  $J = 4.1$  Hz), 124.2, 121.6, 121.3, 120.2, 115.5 (d,  $J = 23.3$  Hz), 108.4 (d,  $J = 22.1$  Hz);  $^{19}\text{F NMR}$   $\delta$  -113.3; HRMS (DART, positive):  $m/z$  calcd. for  $\text{C}_{26}\text{H}_{15}\text{F} [\text{M}]^+$  346.1152, found 346.1147.

### 6-Fluoro-8-phenylbenzo[*b*]fluoranthene (3ad)

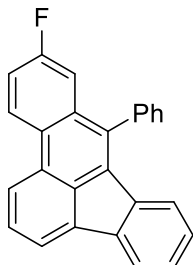

Isolated by PTLC (hexane/DCM = 4/1,  $R_f = 0.50$ ). The title compound was obtained as a yellow solid (16.3 mg, 94%); mp 172-173 °C;  $^1\text{H NMR}$   $\delta$  8.69 (dd,  $J = 8.9, 5.7$  Hz, 1H), 8.43 (d,  $J = 8.1$  Hz, 1H), 8.00 (d,  $J = 7.1$  Hz, 1H), 7.90 (d,  $J = 7.5$  Hz, 1H), 7.80-7.77 (m, 1H), 7.66-7.60 (m, 3H), 7.49 (dd,  $J = 7.5, 1.7$  Hz, 2H), 7.44-7.40 (m, 1H), 7.35-7.31 (m, 2H), 7.09-7.06 (m, 1H), 6.74 (d,  $J = 7.7$  Hz, 1H);  $^{13}\text{C NMR}$   $\delta$  161.7 (d,  $J = 245.6$  Hz), 141.0, 138.5, 137.7, 137.2, 136.2 (d,  $J = 8.2$  Hz), 135.6 (d,  $J = 4.1$  Hz), 133.6, 131.5 (d,  $J = 1.2$  Hz), 130.0, 129.2, 128.6, 128.5, 128.2, 127.5, 127.3 (d,  $J = 1.9$  Hz), 127.1, 125.1 (d,  $J = 8.9$  Hz), 124.5, 121.4, 121.3, 119.5, 115.7 ( $J = 23.8$  Hz), 113.2 ( $J = 22.5$  Hz);  $^{19}\text{F NMR}$   $\delta$  -114.6; HRMS (DART, positive):  $m/z$  calcd. for  $\text{C}_{26}\text{H}_{15}\text{F}^+ [\text{M}]^+$  346.1152, found 346.1142.

### 6-Chloro-8-phenylbenzo[*b*]fluoranthene (3ae)

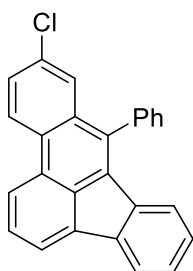

Isolated by PTLC (hexane/toluene = 4/1,  $R_f$  = 0.60). The title compound was obtained as a yellow solid (16.6 mg, 92%); mp 161-162 °C;  $^1\text{H}$  NMR  $\delta$  8.61 (d,  $J$  = 8.6 Hz, 1H), 8.40 (d,  $J$  = 8.1 Hz, 1H), 7.99 (dd,  $J$  = 7.1, 0.6 Hz, 1H), 7.89-7.87 (m, 1H), 7.76 (dd,  $J$  = 8.2, 7.1 Hz, 1H), 7.65-7.60 (m, 5H), 7.48-7.46 (m, 2H), 7.33-7.30 (m, 1H), 7.08-7.05 (m, 1H), 6.70-6.68 (m, 1H);  $^{13}\text{C}$  NMR  $\delta$  141.0, 138.5, 137.5, 137.2, 135.7, 135.4, 133.6, 132.9, 131.8, 130.0, 129.2, 129.1, 128.6, 128.5, 128.2, 127.6, 127.6, 127.4, 127.0, 124.6, 124.5, 121.5, 121.3, 119.9; HRMS (DART, positive):  $m/z$  calcd. for  $\text{C}_{26}\text{H}_{19}\text{ClN}^+$   $[\text{M}+\text{NH}_4]^+$  380.1201, found 380.1195.

### 6-Methoxy-8-phenylbenzo[*b*]fluoranthene (3af)

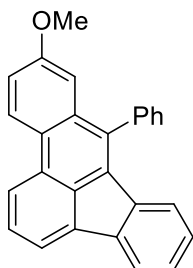

Isolated by PTLC (hexane/toluene = 4/1,  $R_f$  = 0.30). The title compound was obtained as a yellow solid (16.0 mg, 89%); mp 113-114 °C;  $^1\text{H}$  NMR  $\delta$  8.63 (d,  $J$  = 8.9 Hz, 1H), 8.41 (d,  $J$  = 8.1 Hz, 1H), 7.95 (dd,  $J$  = 7.1, 0.6 Hz, 1H), 7.90-7.88 (m, 1H), 7.76 (dd,  $J$  = 8.1, 7.1 Hz, 1H), 7.64-7.57 (m, 3H), 7.52-7.50 (m, 2H), 7.32-7.29 (m, 2H), 7.11-7.04 (m, 2H), 6.72-6.70 (m, 1H), 3.77 (s, 3H);  $^{13}\text{C}$  NMR  $\delta$  158.5, 141.1, 138.8, 138.4, 137.0, 136.0, 135.9, 133.0, 131.0, 130.0, 129.1, 128.3, 128.2, 127.9, 127.5, 127.3, 125.1, 124.6, 124.3, 121.2, 121.1, 118.8, 116.3, 110.2, 55.4; HRMS (DART, positive):  $m/z$  calcd. for  $\text{C}_{27}\text{H}_{19}\text{O}$   $[\text{M}+\text{H}]^+$  359.1430, found 364.1426.

**7-Fluoro-8-phenylbenzo[*b*]fluoranthene (3ag), 4-fluoro-6-phenylbenzo[3,4]cyclobuta[1,2-*c*]phenanthrene (4ag) and 9-fluoro-8-phenylbenzo[*b*]fluoranthene (2ag)**

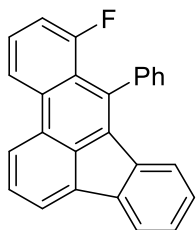

**3ag**

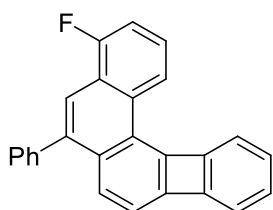

**4ag**

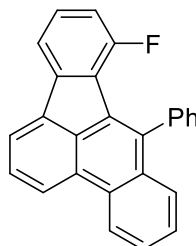

**2ag**

Separated by PTLC (hexane/toluene = 9/1,  $R_f = 0.45$ ). The title compounds were obtained as a yellow solid (13.9 mg, **3ag:4ag:2ag** = 15:4:1 = 61%:15%:4%);  $^1\text{H NMR}$  (**3ag**)  $\delta$  8.55-8.53 (m, 1H), 8.46 (d,  $J = 8.1$  Hz, 1H), 8.01 (dd,  $J = 7.1, 0.6$  Hz, 1H), 7.88-7.86 (m, 1H), 7.78 (dd,  $J = 8.2, 7.1$  Hz, 1H), 7.64-7.60 (m, 1H), 7.58-7.55 (m, 3H), 7.52-7.50 (m, 2H), 7.32-7.28 (m, 1H), 7.21-7.16 (m, 1H), 7.04-7.01 (m, 1H), 6.42-6.40 (m, 1H);  $^{13}\text{C NMR}$  (**3ag**)  $\delta$  161.6 (d,  $J = 255.7$  Hz), 141.1 (d,  $J = 4.5$  Hz), 140.8, 138.7, 138.0, 137.2, 134.2, 133.2 (d,  $J = 3.8$  Hz), 131.8, 128.7, 128.4 (d,  $J = 4.1$  Hz), 128.1, 127.7, 127.6, 127.6, 127.6, 126.8 (d,  $J = 3.0$  Hz), 124.8, 123.1, 122.0, 121.2, 120.1, 119.3 (d,  $J = 4.0$  Hz), 113.7 (d,  $J = 23.2$  Hz);  $^{19}\text{F NMR}$   $\delta$  -105.0 (d,  $J = 13.6$  Hz (**3ag**)),  $\delta$  -105.6 (**4ag**); HRMS (DART, positive):  $m/z$  calcd. for  $\text{C}_{26}\text{H}_{19}\text{FN}^+ [\text{M}+\text{NH}_4]^+$  364.1496, found 364.1493.

**10-Phenylnaphtho[1,2-*b*]fluoranthene (3ah) and 8-phenyldibenzo[*b*,*l*]fluoranthene (2ah)**

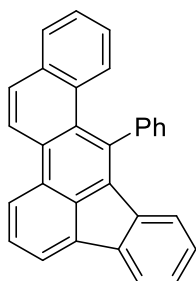

**3ah**

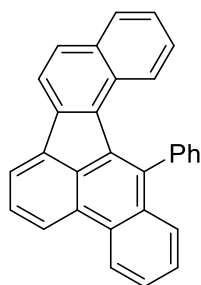

**2ah**

Separated by flash column chromatography (hexane/toluene = 4/1,  $R_f = 0.50$ ). The title compounds were obtained as a yellow solid (11.7mg, **3ah:2ah** = 1.4:1 = 36%:26%);  $^1\text{H NMR}$   $\delta$  8.80 (d,  $J = 8.9$  Hz, 1H (major)), 8.75-8.73 (m, 1H (minor)), 8.61 (d,  $J = 8.3$  Hz, 1H (major)), 8.53 (d,  $J = 8.1$  Hz, 1H (minor)), 8.07-8.03 (m, 2H (major) + 2H (minor)), 7.95-7.76 (m, 4H (major) + 4H (minor)), 7.71-7.65 (m, 3H (major) + 1H (minor)), 7.61-7.56 (m, 2H (major) + 5H (minor)), 7.53-7.50 (m, 1H (minor)), 7.47-7.44 (m, 1H (major)), 7.30-7.27 (m, 1H (major)), 7.22-7.19 (m, 1H (minor)), 7.15-7.11 (m, 1H (major)), 7.04-7.01 (m, 1H (major)), 6.84-6.78 (m, 2H (minor)), 6.38 (d,  $J = 7.8$  Hz, 1H (major));  $^{13}\text{C NMR}$   $\delta$  143.1, 141.4, 140.6, 140.4, 139.8, 138.6, 137.5, 137.1, 136.8, 135.3, 134.9, 134.8, 134.8, 134.6, 134.1, 132.5, 131.8, 131.7, 131.2, 130.9, 130.6, 130.3, 130.2, 129.9, 129.6, 129.6,

129.5, 129.3, 129.1, 129.0, 129.0, 128.4, 128.3, 128.2, 128.1, 127.9, 127.6, 127.5, 127.5, 127.4, 127.2, 126.8, 126.8, 125.7, 125.7, 125.4, 124.6, 124.6, 122.8, 122.6, 121.8, 121.7, 121.2, 119.8, 119.4, 119.3; HRMS (DART, positive):  $m/z$  calcd. for  $C_{30}H_{22}N^+$   $[M+NH_4]^+$  396.1747, found 396.1743.

**5-Chloro-8-(4-methylphenyl)benzo[*b*]fluoranthene (3ba) and 2-chloro-6-(4-methylphenyl)benzo[3,4]cyclobuta[1,2-*c*]phenanthrene (4ba)**

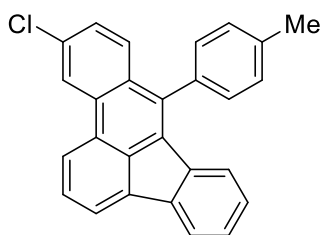

**3ba**

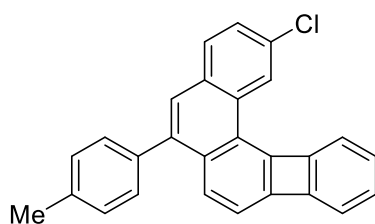

**4ba**

Separated by PTLC (hexane,  $R_f = 0.45$ ). The title compounds were obtained as a yellow solid (12.1 mg, **3ba:4ba** = 32:1 = 64%:2%);  $^1H$  NMR (**3ba**)  $\delta$  8.63 (d,  $J = 2.1$  Hz, 1H), 8.39 (d,  $J = 8.3$  Hz, 1H), 8.00 (d,  $J = 7.1$  Hz, 1H), 7.92-7.84 (m, 1H), 7.80-7.72 (m, 1H), 7.64 (d,  $J = 8.8$  Hz, 1H), 7.45-7.40 (m, 3H), 7.36-7.29 (m, 3H), 7.11-7.06 (m, 1H), 6.79 (d,  $J = 7.7$  Hz, 1H), 2.55 (s, 3H);  $^{13}C$  NMR (**3ba**)  $\delta$  140.8, 138.6, 138.1, 137.1, 136.1, 134.7, 133.2, 133.0, 132.7, 132.2, 131.9, 129.9, 129.8, 129.8, 128.3, 128.0, 127.5, 127.1, 126.4, 124.4, 122.8, 121.5, 121.2, 120.2, 21.7; HRMS (DART, positive):  $m/z$  calcd. For  $C_{27}H_{21}ClN^+$   $[M+NH_4]^+$  394.1357, found 394.1352.

**5-Chloro-8-(4-methoxyphenyl)benzo[*b*]fluoranthene (3ca) and 2-chloro-6-(4-methoxyphenyl)benzo[3,4]cyclobuta[1,2-*c*]phenanthrene (4ca)**

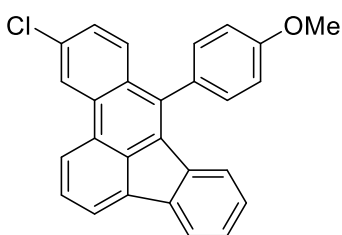

**3ca**

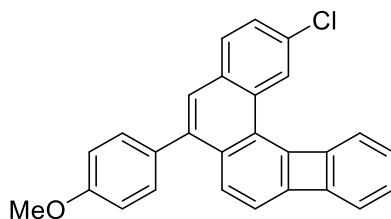

**4ca**

Separated by PTLC (hexane/toluene = 4/1,  $R_f = 0.55$ ). The title compounds were obtained as a yellow solid (13.0 mg, **3ca:4ca** = 12:1 = 61%:5%);  $^1H$  NMR (**3ca**)  $\delta$  8.62 (d,  $J = 2.1$  Hz, 1H), 8.34 (d,  $J = 2.1$  Hz, 1H), 7.99 (d,  $J = 7.1$  Hz, 1H), 7.88 (d,  $J = 7.5$  Hz, 1H), 7.75 (dd,  $J = 8.1, 7.2$  Hz, 1H), 7.65 (d,  $J = 8.8$  Hz, 1H), 7.44 (dd,  $J = 8.8, 2.1$  Hz, 1H), 7.39-7.35 (m, 2H), 7.34-7.29 (m, 1H), 7.17-7.06 (m, 3H), 6.82 (d,  $J = 7.7$  Hz, 1H), 3.97 (s, 3H);  $^{13}C$  NMR (**3ca**)  $\delta$  159.7, 140.8, 138.6, 137.1, 135.8, 133.2, 133.2, 133.0, 132.2, 132.0, 131.2, 129.9, 129.8, 128.3, 128.0, 127.5, 127.1, 126.4, 124.4, 122.8,

121.5, 121.3, 120.2, 114.5, 55.5; HRMS (DART, positive):  $m/z$  calcd. For  $C_{27}H_{21}ClNO^+$   $[M+NH_4]^+$  410.1306, found 410.1301.

### 5-Chloro-8-(4-chlorophenyl)benzo[*b*]fluoranthene (3da)

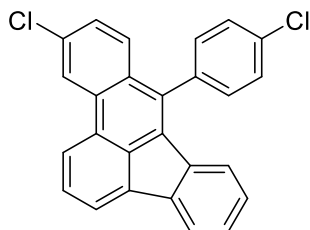

Isolated by PTLC (hexane/toluene = 4/1,  $R_f$  = 0.75). The title compound was obtained as a yellow solid (15.5 mg, 77 %); mp 156-157 °C;  $^1H$  NMR  $\delta$  8.63 (d,  $J$  = 2.1 Hz, 1H), 8.38 (d,  $J$  = 8.1 Hz, 1H), 7.99 (d,  $J$  = 7.2 Hz, 1H), 7.88 (d,  $J$  = 7.5 Hz, 1H), 7.76 (dd,  $J$  = 8.1, 7.2 Hz, 1H), 7.62-7.57 (m, 2H), 7.55 (d,  $J$  = 8.8 Hz, 1H), 7.44 (dd,  $J$  = 8.8, 2.1 Hz, 1H), 7.42-7.37 (m, 2H), 7.37-7.31 (m, 1H), 7.11 (m, 1H), 6.76 (d,  $J$  = 7.7 Hz, 1H);  $^{13}C$  NMR  $\delta$  140.9, 138.2, 137.1, 136.3, 134.5, 134.4, 133.4, 132.9, 132.5, 132.1, 131.9, 131.5, 129.5, 127.5, 128.6, 128.3, 127.6, 127.3, 126.6, 124.2, 122.9, 121.6, 121.4, 120.3; HRMS (DART, positive):  $m/z$  calcd. For  $C_{26}H_{14}Cl_2^+$   $[M]^+$  396.0467, found 396.0457.

### 8-([1,1'-Biphenyl]-4-yl)-5-chlorobenzo[*b*]fluoranthene (3ea)

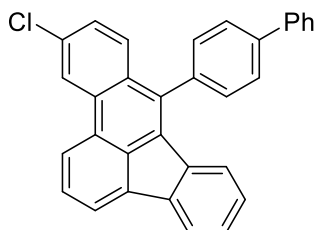

Isolated by PTLC (hexane/toluene = 9/1,  $R_f$  = 0.50). The title compound was obtained as a yellow solid (16.5 mg, 75 %); mp 249-250 °C;  $^1H$  NMR  $\delta$  8.68 (d,  $J$  = 2.2 Hz, 1H), 8.44 (d,  $J$  = 8.1 Hz, 1H), 8.04 (d,  $J$  = 7.0 Hz, 1H), 7.92-7.87 (m, 3H), 7.82-7.79 (m, 3H), 7.72 (d,  $J$  = 8.8 Hz, 1H), 7.57-7.53 (m, 4H), 7.49-7.42 (m, 2H), 7.35-7.32 (m, 1H), 7.11-7.07 (m, 1H), 6.87 (d,  $J$  = 7.7 Hz, 1H);  $^{13}C$  NMR  $\delta$  141.1, 140.9, 140.7, 138.5, 137.2, 136.8, 135.6, 133.4, 132.8, 132.8, 132.3, 132.0, 130.5, 129.9, 129.1, 128.5, 128.1, 127.8, 127.7, 127.6, 127.3, 127.3, 126.6, 124.4, 122.9, 121.6, 121.3, 120.3; HRMS (DART, positive):  $m/z$  calcd. for  $C_{32}H_{23}ClN^+$   $[M + NH_4]^+$  456.1514, found 456.1510.

**5-Chloro-8-(4-trifluoromethylphenyl)benzo[*b*]fluoranthene (3fa) and 11-chloro-8-(4-trifluoromethylphenyl)benzo[*b*]fluoranthene (2fa)**

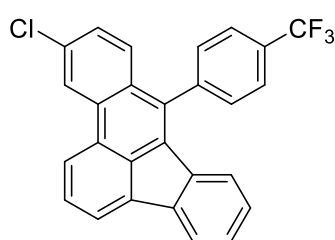

**3fa**

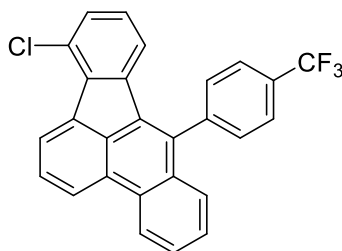

**2fa**

Separated by PTLC (hexane/toluene = 14/1,  $R_f$  = 0.45). The title compounds were obtained as a yellow solid (14.8 mg, **3fa:2fa** = 4.3:1 = 55%:13%);  $^1\text{H}$  NMR  $\delta$  8.74 (d,  $J$  = 8.0 Hz, 1H (minor)), 8.67 (d,  $J$  = 2.0 Hz, 1H (major)), 8.54 (d,  $J$  = 8.2 Hz, 1H (minor)), 8.42 (d,  $J$  = 8.2 Hz, 1H (major)), 8.03 (d,  $J$  = 7.0 Hz, 1H (major)), 8.00 (d,  $J$  = 7.1 Hz, 1H (minor)), 7.94-7.88 (m, 3H (major) + 2H (minor)), 7.86 (d,  $J$  = 1.9 Hz, 1H (minor)), 7.83-7.78 (m, 1H (major) + 1H (minor)), 7.76-7.68 (m, 1H (minor)), 7.64-7.61 (m, 2H (major) + 2H (minor)), 7.58-7.54 (m, 2H (minor)), 7.50-7.45 (m, 2H (major)), 7.36-7.33 (m, 1H (major)), 7.12-7.08 (m, 1H (major)), 7.06 (dd,  $J$  = 8.2, 2.0 Hz, 1H (minor)), 6.66 (d,  $J$  = 7.7 Hz, 1H (major)), 6.56 (d,  $J$  = 8.2 Hz, 1H (minor));  $^{13}\text{C}$  NMR (**3fa**)  $\delta$  141.8, 140.9, 138.0, 137.2, 134.0, 133.6, 132.8, 132.0, 132.0 (q,  $J$  = 35.0 Hz), 131.9, 130.6, 129.3, 128.8, 128.4, 127.7, 127.4, 126.8, 126.6, 126.2 (q,  $J$  = 3.5 Hz), 124.4 (q,  $J$  = 274.2 Hz), 124.1, 123.0, 121.7, 121.5, 120.4;  $^{19}\text{F}$  NMR (**3fa**)  $\delta$  -62.2; HRMS (DART, positive):  $m/z$  calcd. For  $\text{C}_{27}\text{H}_{15}\text{ClF}_3^+$   $[\text{M}+\text{H}]^+$  430.0731, found 430.0727.

**5-Chloro-8-(3-trifluoromethylphenyl)benzo[*b*]fluoranthene (3ga) and 11-chloro-8-(3-trifluoromethylphenyl)benzo[*b*]fluoranthene (2ga)**

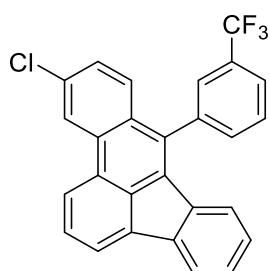

**3ga**

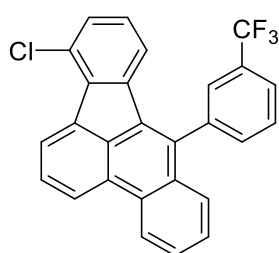

**2ga**

Separated by PTLC (hexane/toluene = 4/1,  $R_f$  = 0.50). The title compounds were obtained as a yellow solid (20.0 mg, **3ga:2ga** = 6.7:1 = 80%:11%);  $^1\text{H}$  NMR  $\delta$  8.74 (d,  $J$  = 8.5 Hz, 1H (minor)), 8.67 (d,  $J$  = 2.0 Hz, 1H (major)), 8.54 (d,  $J$  = 8.1 Hz, 1H (minor)), 8.42 (d,  $J$  = 8.1 Hz, 1H (major)), 8.04-8.01 (m, 1H (major)), 7.99 (d,  $J$  = 7.1 Hz, 1H (minor)), 7.92-7.88 (m, 2H (major)), 7.86 (d,  $J$  = 1.9 Hz, 1H (minor)), 7.84-7.74 (m, 3H (major) + 3H (minor)), 7.73 (s, 1H (minor)), 7.70-7.67 (m, 1H (major) +

1H (minor), 7.64-7.53 (m, 3H (minor)), 7.53-7.46 (m, 2H (major)), 7.36-7.32 (m, 1H (major)), 7.11-7.06 (m, 1H (major)), 7.05 (dd,  $J = 8.2, 2.0$  Hz, 1H (minor)), 6.62 (d,  $J = 7.7$  Hz, 1H (major)), 6.52 (d,  $J = 8.2$  Hz, 1H (minor));  $^{13}\text{C}$  NMR (**3ga**)  $\delta$  141.0, 138.8, 138.0, 137.2, 133.8, 133.6 (q,  $J = 1.2$  Hz), 133.6, 133.1, 132.3, 132.0, 131.9, 131.7 (q,  $J = 32.8$  Hz), 129.7, 129.3, 128.8, 128.4, 127.7, 127.5, 127.0 (q,  $J = 3.7$  Hz), 126.7, 125.4 (q,  $J = 3.7$  Hz), 124.2 (q,  $J = 272.9$  Hz), 124.0, 123.0, 121.7, 121.5, 120.4;  $^{19}\text{F}$  NMR (**3ga**)  $\delta$  -62.3; HRMS (DART, positive):  $m/z$  calcd. For  $\text{C}_{27}\text{H}_{18}\text{ClF}_3\text{N}^+$   $[\text{M}+\text{NH}_4]^+$  448.1074, found 448.1072.

### 5-Chloro-8-(3-methylphenyl)benzo[*b*]fluoranthene (**3ha**)

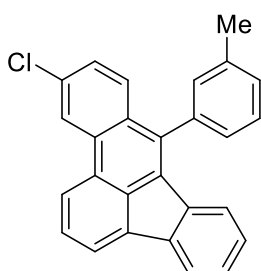

Isolated by PTLC (hexane/toluene = 9/1,  $R_f = 0.30$ ). The title compound was obtained as a yellow solid (5.9 mg, 31%); mp 47-48 °C;  $^1\text{H}$  NMR  $\delta$  8.66 (d,  $J = 2.1$  Hz, 1H), 8.43 (d,  $J = 8.1$  Hz, 1H), 8.03 (d,  $J = 7.1$  Hz, 1H), 7.90 (d,  $J = 7.5$  Hz, 1H), 7.79 (dd,  $J = 8.1, 7.2$  Hz, 1H), 7.66 (d,  $J = 8.8$  Hz, 1H), 7.53-7.41 (m, 3H), 7.34-7.27 (m, 3H), 7.11-7.07 (m, 1H), 6.76 (d,  $J = 7.7$  Hz, 1H), 2.48 (s, 3H);  $^{13}\text{C}$  NMR  $\delta$  140.8, 138.8, 138.6, 137.7, 137.2, 136.2, 133.3, 132.9, 132.6, 131.9, 130.6, 130.0, 129.1, 129.0, 128.4, 128.0, 127.6, 127.2, 127.0, 126.5, 124.4, 122.8, 121.6, 121.3, 120.2, 21.7 (a pair of peaks at the aromatic region was overlapped); HRMS (DART, positive):  $m/z$  calcd. for  $\text{C}_{27}\text{H}_{21}\text{ClN}^+$   $[\text{M}+\text{NH}_4]^+$  394.1357, found 394.1353.

### 5-Chloro-8-propylbenzo[*b*]fluoranthene (**3ia**), and 11-chloro-8-propylbenzo[*b*]fluoranthene (**2ia**)

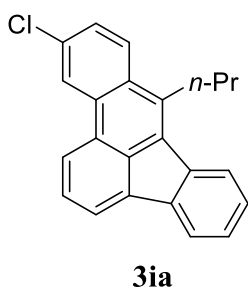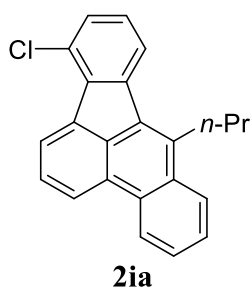

Separated by PTLC (hexane/toluene = 14/1,  $R_f = 0.40$ ). The title compounds were obtained as a yellow solid (13.0 mg, **3ia:2ia** = 12:1 = 72%:6%);  $^1\text{H}$  NMR  $\delta$  8.71-8.69 (m, 1H (minor)), 8.63 (d,  $J = 2.2$  Hz, 1H (major)), 8.48 (d,  $J = 8.4$  Hz, 1H (minor)), 8.36-8.34 (m, 1H (major)), 8.31-8.29 (m,



1H (minor)), 8.21 (d,  $J = 8.9$  Hz, 1H (major)), 8.07-8.05 (m, 1H (major) + 1H (minor)), 8.00-7.96 (m, 2H (major) + 2H (minor)), 7.92 (d,  $J = 2.0$  Hz, 1H (minor)), 7.74-7.68 (m, 1H (major) + 1H (minor)), 7.61 (dd,  $J = 8.9, 2.2$  Hz, 1H (major)), 7.45-7.43 (m, 2H (major) + 2H (minor)), 3.55-3.52 (m, 2H (major) + 2H (minor)), 1.96-1.88 (m, 2H (major) + 2H (minor)), 1.25-1.21 (m, 3H (major) + 3H (minor));  $^{13}\text{C}$  NMR (**3ia**)  $\delta$  140.9, 136.9, 136.5, 133.1, 132.4, 132.4, 132.3, 132.1, 127.8, 127.7, 127.7, 127.3, 127.2, 124.7, 123.2, 121.5, 121.5, 119.8, 31.3, 23.7, 14.8 (two pairs of peaks at the aromatic region were overlapped); HRMS (DART, positive):  $m/z$  calcd. for  $\text{C}_{23}\text{H}_{18}\text{Cl}^+$   $[\text{M}+\text{H}]^+$  329.1092, found 329.1087.

### 2-Chloro-6-propylbenzo[3,4]cyclobuta[1,2-*c*]phenanthrene (4ia)

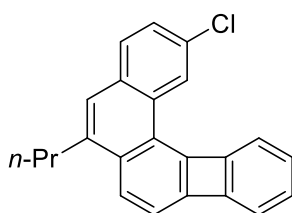

Isolated by PTLC (hexane/toluene = 14/1,  $R_f = 0.45$ ). The title compound was obtained as a yellow solid (3.3 mg, 20%); mp 125-126 °C;  $^1\text{H}$  NMR  $\delta$  8.15 (d,  $J = 2.0$  Hz, 1H), 7.58-7.53 (m, 2H), 7.45-7.43 (m, 1H), 7.21 (s, 1H), 7.00-6.97 (m, 2H), 6.81-6.72 (m, 2H), 6.60-6.58 (m, 1H), 2.88-2.85 (m, 2H), 1.80-1.73 (m, 2H), 1.05-1.03 (m, 3H);  $^{13}\text{C}$  NMR  $\delta$  151.9, 151.8, 150.1, 147.9, 138.2, 132.8, 131.4, 131.0, 129.7, 128.8, 128.8, 128.5, 127.7, 125.4, 125.1, 125.0, 124.7, 118.5, 116.9, 116.6, 35.8, 23.2, 14.4;  $m/z$  calcd. for  $\text{C}_{23}\text{H}_{21}\text{ClN}^+$   $[\text{M}+\text{NH}_4]^+$  346.1357, found 346.1353.

## 6) References

- (S1) N. Sugimura, A. Furuya, T. Yatsu and T. Shibue, *Eur. J. Mass Spectrom.* **2015**, *21*, 91–96.
- (S2) (a) H. Takano, T. Ito, K. S. Kanyiva and T. Shibata, *Chem. Eur. J.* **2018**, *24*, 15173-15177; (b) H. Takano, N. Shiozawa, Y. Imai, K. S. Kanyiva and T. Shibata, *J. Am. Chem. Soc.* **2020**, *142*, 4714-4722.
- (S3) (a) P. Wang, L.-W. Feng, L. Wang, J.-F. Li, S. Liao and Y. Tang, *J. Am. Chem. Soc.* **2015**, *137*, 4626-4629; (b) T. Murakami and K. Furusawa, *Synthesis* **2002**, 479-482.
- (S4) Gaussian 16, Revision A.03, M. J. Frisch, G. W. Trucks, H. B. Schlegel, G. E. Scuseria, M. A. Robb, J. R. Cheeseman, G. Scalmani, V. Barone, G. A. Petersson, H. Nakatsuji, X. Li, M. Caricato, A. V. Marenich, J. Bloino, B. G. Janesko, R. Gomperts, B. Mennucci, H. P. Hratchian, J. V. Ortiz, A. F. Izmaylov, J. L. Sonnenberg, D. Williams-Young, F. Ding, F. Lipparini, F. Egidi, J. Goings, B. Peng, A. Petrone, T. Henderson, D. Ranasinghe, V. G. Zakrzewski, J. Gao, N. Rega, G. Zheng, W. Liang, M. Hada, M. Ehara, K. Toyota, R. Fukuda, J. Hasegawa, M. Ishida, T. Nakajima, Y. Honda, O. Kitao, H. Nakai, T. Vreven, K. Throssell, J. A. Montgomery, Jr., J. E. Peralta, F. Ogliaro, M. J. Bearpark, J. J. Heyd, E. N. Brothers, K. N. Kudin, V. N. Staroverov, T. A. Keith, R. Kobayashi, J. Normand, K. Raghavachari, A. P. Rendell, J. C. Burant, S. S. Iyengar, J. Tomasi, M. Cossi, J. M. Millam, M. Klene, C. Adamo, R. Cammi, J. W. Ochterski, R. L. Martin, K. Morokuma, O. Farkas, J. B. Foresman, and D. J. Fox, Gaussian, Inc., Wallingford CT, 2016.
- (S5) Y. Zhao and D. G. Truhlar, *Theor. Chem. Acc.* **2008**, *120*, 215–241.
- (S6) (a) A. Bergner, M. Dolg, W. Kuechle, H. Stoll and H. Preuss, *Mol. Phys.* 1993, *80*, 1431-1441; (b) M. Kaupp, P.V.R. Schleyer, H. Stoll and H. Preuss, *J. Chem. Phys.* **1991**, *94*, 1360-1366; (c) M. Dolg, H. Stoll, H. Preuss and R.M. Pitzer, *J. Phys. Chem.* **1993**, *97*, 5852-5859.
- (S7) (a) A. Schäfer, H. Horn and R. Ahlrichs, *J. Chem. Phys.* **1992**, *97*, 2571–2577; (b) A. Schäfer, C. Huber and R. Ahlrichs, *J. Chem. Phys.* **1994**, *100*, 5829–5835; (c) F. Weigend and R. Ahlrichs, *Phys. Chem. Chem. Phys.* **2005**, *7*, 3297–3305.
- (S8) (a) M. T. Cancès, B. Mennucci, and J. Tomasi, *J. Chem. Phys.* **1997**, *107*, 3032-3041; (b) B. Mennucci and J. Tomasi, *J. Chem. Phys.* **1997**, *106*, 5151-5158; (c) B. Mennucci, E. Cancès, and J. Tomasi, *J. Phys. Chem. B* **1997**, *101*, 10506- 10517; (d) J. Tomasi, B. Mennucci, and E. Cancès, *J. Mol. Struct. (Theochem)* 1999, *464*, 211-226.
- (S9) G. Henkelman and H. Jónsson, *J. Chem. Phys.* **2000**, *113*, 9978–9985.
- (S10) (a) C. Peng and H. B. Schlegel, *Isr. J. Chem.* **1993**, *33*, 449–454; (b) C. Peng, P. Y. Ayala, H. B. Schlegel and M. J. Frisch, *J. Comput. Chem.* **1996**, *17*, 49–56.
- (S11) (a) K. Fukui, *J. Phys. Chem.* **1970**, *74*, 4161-4163; (b) K. Fukui, *Acc. Chem. Res.* **1981**, *14*, 363–368.

## 7) Cartesian coordinates of stationary points optimized at M06/SDD for Au and M06/6-31G(d,p) for other atoms

1ab (NIMGA = 0)

| Center | Atomic | Atomic | Coordinates (Angstroms) |           |           |
|--------|--------|--------|-------------------------|-----------|-----------|
| Number | Number | Type   | X                       | Y         | Z         |
| 29     | 1      | 0      | -0.736925               | 4.132871  | -2.086269 |
| 30     | 1      | 0      | 2.082225                | 4.142705  | 0.531819  |
| 31     | 1      | 0      | 3.168693                | 3.047725  | 2.502605  |
| 32     | 1      | 0      | 2.301473                | 0.970241  | 3.447402  |
| 33     | 1      | 0      | 0.296878                | -0.174960 | 2.474872  |
| 34     | 1      | 0      | -1.840412               | -3.740260 | 0.859300  |
| 35     | 1      | 0      | -4.280638               | -3.841798 | 1.300301  |
| 36     | 1      | 0      | -5.694839               | -1.837500 | 0.860259  |
| 37     | 1      | 0      | -4.655090               | 0.238775  | 0.010704  |
| 38     | 1      | 0      | 2.159823                | 0.490314  | -0.668219 |
| 39     | 1      | 0      | 4.605838                | 0.613612  | -1.064736 |
| 40     | 1      | 0      | 5.959736                | -1.469276 | -1.151116 |
| 41     | 1      | 0      | 4.858111                | -3.672921 | -0.842067 |
| 42     | 1      | 0      | 2.410704                | -3.793268 | -0.443704 |
| 1      | 6      | 0      | -2.717536               | 1.362164  | -1.678192 |
| 2      | 6      | 0      | -2.239281               | 2.551176  | -2.199942 |
| 3      | 6      | 0      | -1.096963               | 3.196527  | -1.668455 |
| 4      | 6      | 0      | -0.503057               | 2.561757  | -0.610591 |
| 5      | 6      | 0      | -0.990407               | 1.340275  | -0.076944 |
| 6      | 6      | 0      | -2.099627               | 0.697917  | -0.580742 |
| 7      | 6      | 0      | 0.582341                | 2.579944  | 0.425222  |
| 8      | 6      | 0      | 0.085194                | 1.367169  | 0.968726  |
| 9      | 6      | 0      | 1.682916                | 3.216588  | 0.937578  |
| 10     | 6      | 0      | 2.289946                | 2.590712  | 2.052953  |
| 11     | 6      | 0      | 1.796193                | 1.410777  | 2.590943  |
| 12     | 6      | 0      | 0.662062                | 0.757965  | 2.052721  |
| 13     | 6      | 0      | -2.665351               | -0.558104 | -0.052057 |
| 14     | 6      | 0      | -1.866347               | -1.699072 | 0.193766  |
| 15     | 6      | 0      | -2.468860               | -2.870476 | 0.682190  |
| 16     | 6      | 0      | -3.833301               | -2.925929 | 0.922152  |
| 17     | 6      | 0      | -4.624350               | -1.806147 | 0.672527  |
| 18     | 6      | 0      | -4.040368               | -0.641857 | 0.189004  |
| 19     | 6      | 0      | -0.469007               | -1.702581 | -0.076259 |
| 20     | 6      | 0      | 0.726867                | -1.715339 | -0.292465 |
| 21     | 6      | 0      | 2.129583                | -1.660257 | -0.531687 |
| 22     | 6      | 0      | 2.758789                | -0.418001 | -0.713319 |
| 23     | 6      | 0      | 4.128198                | -0.354435 | -0.932206 |
| 24     | 6      | 0      | 4.887279                | -1.522567 | -0.979246 |
| 25     | 6      | 0      | 4.269313                | -2.759391 | -0.804673 |
| 26     | 6      | 0      | 2.900034                | -2.831827 | -0.581737 |
| 27     | 1      | 0      | -3.587243               | 0.895439  | -2.138249 |
| 28     | 1      | 0      | -2.753886               | 2.996373  | -3.048506 |

Au[P(OMe)<sub>3</sub>] (NIMGA = 0)

| Center | Atomic | Atomic | Coordinates (Angstroms) |           |           |
|--------|--------|--------|-------------------------|-----------|-----------|
| Number | Number | Type   | X                       | Y         | Z         |
| 1      | 79     | 0      | 1.332594                | -0.000249 | 0.000719  |
| 2      | 15     | 0      | -1.031793               | 0.000281  | -0.000582 |
| 3      | 8      | 0      | -1.714397               | 1.523830  | 0.109883  |
| 4      | 8      | 0      | -1.714647               | -0.857963 | 1.262851  |
| 5      | 8      | 0      | -1.712766               | -0.665686 | -1.376218 |
| 6      | 6      | 0      | -1.797254               | -0.316853 | 2.632633  |
| 7      | 1      | 0      | -2.385855               | 0.602322  | 2.628658  |
| 8      | 1      | 0      | -2.298250               | -1.100708 | 3.197241  |
| 9      | 1      | 0      | -0.792211               | -0.146022 | 3.032478  |
| 10     | 6      | 0      | -1.790147               | 2.441086  | -1.042819 |
| 11     | 1      | 0      | -2.374384               | 1.979447  | -1.840917 |
| 12     | 1      | 0      | -2.293012               | 3.321690  | -0.648022 |

|    |   |   |           |           |           |    |   |   |           |           |           |
|----|---|---|-----------|-----------|-----------|----|---|---|-----------|-----------|-----------|
| 13 | 1 | 0 | -0.782981 | 2.701968  | -1.384524 | 24 | 6 | 0 | -4.285533 | 3.634419  | 0.304689  |
| 14 | 6 | 0 | -1.792214 | -2.122765 | -1.592130 | 25 | 6 | 0 | -3.676256 | 3.865725  | -0.931326 |
| 15 | 1 | 0 | -2.379176 | -2.579996 | -0.793491 | 26 | 6 | 0 | -2.377857 | 3.424766  | -1.161089 |
| 16 | 1 | 0 | -2.293700 | -2.221197 | -2.552865 | 27 | 1 | 0 | 3.596678  | -1.604022 | -1.627218 |
| 17 | 1 | 0 | -0.786282 | -2.552316 | -1.644844 | 28 | 1 | 0 | 2.968753  | -3.777440 | -0.685871 |

-----

**Int1 (NIMGA = 0)**

-----

| Center | Atomic | Atomic | Coordinates (Angstroms) |   |   |
|--------|--------|--------|-------------------------|---|---|
| Number | Number | Type   | X                       | Y | Z |

|    |   |   |           |           |           |
|----|---|---|-----------|-----------|-----------|
| 1  | 6 | 0 | 3.029738  | -1.642080 | -0.699488 |
| 2  | 6 | 0 | 2.669378  | -2.871195 | -0.166549 |
| 3  | 6 | 0 | 1.933715  | -2.986699 | 1.044941  |
| 4  | 6 | 0 | 1.592999  | -1.805366 | 1.650238  |
| 5  | 6 | 0 | 1.948138  | -0.533467 | 1.096538  |
| 6  | 6 | 0 | 2.677690  | -0.404505 | -0.073753 |
| 7  | 6 | 0 | 0.967575  | -1.105899 | 2.836102  |
| 8  | 6 | 0 | 1.335138  | 0.160334  | 2.290590  |
| 9  | 6 | 0 | 0.316464  | -1.219830 | 4.038553  |
| 10 | 6 | 0 | 0.023554  | 0.000800  | 4.701032  |
| 11 | 6 | 0 | 0.383360  | 1.233832  | 4.167897  |
| 12 | 6 | 0 | 1.062668  | 1.345343  | 2.926366  |
| 13 | 6 | 0 | 3.115566  | 0.889486  | -0.633519 |
| 14 | 6 | 0 | 2.223584  | 1.970554  | -0.828142 |
| 15 | 6 | 0 | 2.705928  | 3.193518  | -1.329590 |
| 16 | 6 | 0 | 4.049063  | 3.346476  | -1.648408 |
| 17 | 6 | 0 | 4.928733  | 2.276700  | -1.475207 |
| 18 | 6 | 0 | 4.462522  | 1.064519  | -0.973373 |
| 19 | 6 | 0 | 0.807176  | 1.867112  | -0.582156 |
| 20 | 6 | 0 | -0.351141 | 2.290942  | -0.376228 |
| 21 | 6 | 0 | -1.676119 | 2.754871  | -0.139448 |
| 22 | 6 | 0 | -2.294340 | 2.528230  | 1.107894  |
| 23 | 6 | 0 | -3.595814 | 2.966121  | 1.320766  |

|    |    |   |           |           |           |
|----|----|---|-----------|-----------|-----------|
| 29 | 1  | 0 | 1.683910  | -3.962513 | 1.447778  |
| 30 | 1  | 0 | 0.046125  | -2.170757 | 4.487487  |
| 31 | 1  | 0 | -0.485780 | -0.031637 | 5.659626  |
| 32 | 1  | 0 | 0.150459  | 2.137833  | 4.723205  |
| 33 | 1  | 0 | 1.349957  | 2.316366  | 2.532932  |
| 34 | 1  | 0 | 2.008657  | 4.012970  | -1.478343 |
| 35 | 1  | 0 | 4.407537  | 4.294653  | -2.035356 |
| 36 | 1  | 0 | 5.979102  | 2.389478  | -1.724083 |
| 37 | 1  | 0 | 5.154068  | 0.241749  | -0.812233 |
| 38 | 1  | 0 | -1.741420 | 2.011059  | 1.890121  |
| 39 | 1  | 0 | -4.074335 | 2.793547  | 2.279397  |
| 40 | 1  | 0 | -5.300528 | 3.978417  | 0.478216  |
| 41 | 1  | 0 | -4.215593 | 4.389061  | -1.714209 |
| 42 | 1  | 0 | -1.894726 | 3.592238  | -2.119612 |
| 43 | 79 | 0 | -0.242204 | -0.147098 | -0.596035 |
| 44 | 15 | 0 | -1.533203 | -2.120129 | -0.883881 |
| 45 | 8  | 0 | -1.268261 | -3.477697 | 0.086002  |
| 46 | 8  | 0 | -1.451627 | -2.797432 | -2.432842 |
| 47 | 8  | 0 | -3.199334 | -1.896615 | -0.687470 |
| 48 | 6  | 0 | -1.704126 | -3.481770 | 1.482489  |
| 49 | 6  | 0 | -0.198227 | -3.398588 | -2.888622 |
| 50 | 6  | 0 | -3.880099 | -0.844412 | -1.438399 |
| 51 | 1  | 0 | -2.794734 | -3.440595 | 1.529019  |
| 52 | 1  | 0 | -1.340894 | -4.426094 | 1.886319  |
| 53 | 1  | 0 | -1.260168 | -2.641129 | 2.032512  |
| 54 | 1  | 0 | 0.009644  | -4.301914 | -2.309097 |
| 55 | 1  | 0 | -0.367484 | -3.647009 | -3.934852 |
| 56 | 1  | 0 | 0.632004  | -2.684772 | -2.802120 |
| 57 | 1  | 0 | -3.855016 | -1.074590 | -2.507205 |
| 58 | 1  | 0 | -4.905782 | -0.854962 | -1.073481 |

|    |   |   |           |          |           |    |   |   |          |          |           |
|----|---|---|-----------|----------|-----------|----|---|---|----------|----------|-----------|
| 59 | 1 | 0 | -3.425333 | 0.137066 | -1.240231 | 28 | 1 | 0 | 3.704921 | 2.233411 | -2.761600 |
|----|---|---|-----------|----------|-----------|----|---|---|----------|----------|-----------|

-----

**TS1 (NIMGA = 1, 410.90i cm<sup>-1</sup>)**

-----

| Center | Atomic | Atomic | Coordinates (Angstroms) |   |   |
|--------|--------|--------|-------------------------|---|---|
| Number | Number | Type   | X                       | Y | Z |

|    |    |   |           |           |           |
|----|----|---|-----------|-----------|-----------|
| 1  | 6  | 0 | 3.787352  | 1.365150  | -2.113574 |
| 2  | 6  | 0 | 4.482437  | 0.239607  | -2.547245 |
| 3  | 6  | 0 | 4.653683  | -0.921181 | -1.744369 |
| 4  | 6  | 0 | 4.033003  | -0.898929 | -0.525779 |
| 5  | 6  | 0 | 3.211077  | 0.216103  | -0.095140 |
| 6  | 6  | 0 | 3.173343  | 1.410225  | -0.840286 |
| 7  | 6  | 0 | 3.974082  | -1.485137 | 0.844363  |
| 8  | 6  | 0 | 3.268914  | -0.346149 | 1.316430  |
| 9  | 6  | 0 | 4.342823  | -2.515666 | 1.681779  |
| 10 | 6  | 0 | 3.966168  | -2.366491 | 3.034394  |
| 11 | 6  | 0 | 3.278561  | -1.241078 | 3.492528  |
| 12 | 6  | 0 | 2.908612  | -0.181188 | 2.630178  |
| 13 | 6  | 0 | 2.421570  | 2.564679  | -0.346738 |
| 14 | 6  | 0 | 1.087137  | 2.350040  | 0.082153  |
| 15 | 6  | 0 | 0.347291  | 3.431827  | 0.565045  |
| 16 | 6  | 0 | 0.913625  | 4.705437  | 0.632116  |
| 17 | 6  | 0 | 2.220077  | 4.914261  | 0.194540  |
| 18 | 6  | 0 | 2.970761  | 3.845976  | -0.300920 |
| 19 | 6  | 0 | 0.523700  | 1.012882  | -0.094168 |
| 20 | 6  | 0 | 1.173870  | -0.075587 | -0.428074 |
| 21 | 79 | 0 | -1.513466 | 0.555967  | 0.061160  |
| 22 | 6  | 0 | 1.041135  | -1.469366 | -0.765270 |
| 23 | 6  | 0 | 0.914082  | -2.439444 | 0.248589  |
| 24 | 6  | 0 | 0.755285  | -3.780668 | -0.090843 |
| 25 | 6  | 0 | 0.731897  | -4.165011 | -1.433521 |
| 26 | 6  | 0 | 0.860304  | -3.207507 | -2.445435 |
| 27 | 6  | 0 | 1.016998  | -1.865283 | -2.116981 |

|    |    |   |           |           |           |
|----|----|---|-----------|-----------|-----------|
| 29 | 1  | 0 | 4.943467  | 0.262987  | -3.530998 |
| 30 | 1  | 0 | 5.293942  | -1.730451 | -2.076847 |
| 31 | 1  | 0 | 4.891443  | -3.390522 | 1.349609  |
| 32 | 1  | 0 | 4.224831  | -3.147659 | 3.742741  |
| 33 | 1  | 0 | 3.017840  | -1.177840 | 4.544880  |
| 34 | 1  | 0 | 2.373126  | 0.686770  | 3.002151  |
| 35 | 1  | 0 | -0.682235 | 3.273849  | 0.878383  |
| 36 | 1  | 0 | 0.328309  | 5.536220  | 1.012959  |
| 37 | 1  | 0 | 2.656692  | 5.907006  | 0.235021  |
| 38 | 1  | 0 | 3.995450  | 4.001033  | -0.629175 |
| 39 | 1  | 0 | 0.928739  | -2.125097 | 1.289918  |
| 40 | 1  | 0 | 0.652446  | -4.526753 | 0.691080  |
| 41 | 1  | 0 | 0.613420  | -5.212617 | -1.693970 |
| 42 | 1  | 0 | 0.837412  | -3.511453 | -3.487348 |
| 43 | 1  | 0 | 1.116578  | -1.108121 | -2.891015 |
| 44 | 15 | 0 | -3.785286 | -0.157002 | 0.181483  |
| 45 | 8  | 0 | -4.155203 | -1.444246 | -0.892448 |
| 46 | 8  | 0 | -5.107422 | 0.842061  | -0.171681 |
| 47 | 8  | 0 | -4.195407 | -0.698830 | 1.719916  |
| 48 | 6  | 0 | -3.197186 | -2.535947 | -1.022891 |
| 49 | 6  | 0 | -5.320439 | 1.319972  | -1.536202 |
| 50 | 6  | 0 | -5.567630 | -1.113145 | 2.041343  |
| 51 | 1  | 0 | -3.092959 | -3.069793 | -0.071547 |
| 52 | 1  | 0 | -3.614616 | -3.199775 | -1.778976 |
| 53 | 1  | 0 | -2.217163 | -2.166062 | -1.355796 |
| 54 | 1  | 0 | -5.552634 | 0.479854  | -2.194930 |
| 55 | 1  | 0 | -6.168615 | 1.999318  | -1.468140 |
| 56 | 1  | 0 | -4.438842 | 1.862644  | -1.898440 |
| 57 | 1  | 0 | -5.924435 | -1.843490 | 1.308914  |
| 58 | 1  | 0 | -5.494517 | -1.563253 | 3.029961  |
| 59 | 1  | 0 | -6.220477 | -0.238762 | 2.056805  |

-----

**Int2 (NIMGA = 0)**

| -----  |        |        | 32                      | 1         | 0         | 4.745414  | -3.337903 | 3.105760 |           |           |           |
|--------|--------|--------|-------------------------|-----------|-----------|-----------|-----------|----------|-----------|-----------|-----------|
| Center | Atomic | Atomic | Coordinates (Angstroms) |           |           | 33        | 1         | 0        | 3.855800  | -1.327369 | 4.175286  |
| Number | Number | Type   | X                       | Y         | Z         | 34        | 1         | 0        | 2.982637  | 0.604607  | 2.838166  |
| -----  |        |        | 35                      | 1         | 0         | -0.802935 | 3.055836  | 0.918104 |           |           |           |
| 1      | 6      | 0      | 4.150104                | 1.739357  | -1.760152 | 36        | 1         | 0        | 0.051627  | 5.367919  | 1.161520  |
| 2      | 6      | 0      | 4.807658                | 0.667513  | -2.383754 | 37        | 1         | 0        | 2.375766  | 5.926804  | 0.476698  |
| 3      | 6      | 0      | 4.698421                | -0.666377 | -1.947736 | 38        | 1         | 0        | 3.852102  | 4.153206  | -0.416077 |
| 4      | 6      | 0      | 3.832526                | -0.904726 | -0.907085 | 39        | 1         | 0        | 0.253209  | -1.690594 | 1.523979  |
| 5      | 6      | 0      | 2.875699                | 0.155960  | -0.366506 | 40        | 1         | 0        | -0.478299 | -4.056880 | 1.284982  |
| 6      | 6      | 0      | 3.195663                | 1.540754  | -0.764206 | 41        | 1         | 0        | -0.197910 | -5.228779 | -0.889342 |
| 7      | 6      | 0      | 3.898977                | -1.616978 | 0.362019  | 42        | 1         | 0        | 0.808740  | -4.031616 | -2.819515 |
| 8      | 6      | 0      | 3.363917                | -0.478283 | 0.990590  | 43        | 1         | 0        | 1.542046  | -1.674227 | -2.576715 |
| 9      | 6      | 0      | 4.421699                | -2.682424 | 1.084744  | 44        | 15        | 0        | -3.817769 | -0.214850 | 0.027008  |
| 10     | 6      | 0      | 4.372411                | -2.537026 | 2.475268  | 45        | 8         | 0        | -4.196246 | -1.400229 | -1.131159 |
| 11     | 6      | 0      | 3.869180                | -1.375621 | 3.090346  | 46        | 8         | 0        | -5.055718 | 0.910500  | -0.261212 |
| 12     | 6      | 0      | 3.368361                | -0.286940 | 2.354839  | 47        | 8         | 0        | -4.403708 | -0.959277 | 1.438862  |
| 13     | 6      | 0      | 2.367955                | 2.591066  | -0.232331 | 48        | 6         | 0        | -3.408024 | -2.628381 | -1.157967 |
| 14     | 6      | 0      | 1.032812                | 2.260588  | 0.148970  | 49        | 6         | 0        | -5.173101 | 1.525117  | -1.580528 |
| 15     | 6      | 0      | 0.222677                | 3.290913  | 0.642031  | 50        | 6         | 0        | -4.653023 | -0.146233 | 2.625113  |
| 16     | 6      | 0      | 0.701141                | 4.592163  | 0.767598  | 51        | 1         | 0        | -3.560132 | -3.190974 | -0.231379 |
| 17     | 6      | 0      | 2.007561                | 4.911215  | 0.377081  | 52        | 1         | 0        | -3.788112 | -3.194264 | -2.007306 |
| 18     | 6      | 0      | 2.828305                | 3.918296  | -0.135321 | 53        | 1         | 0        | -2.340601 | -2.411276 | -1.302015 |
| 19     | 6      | 0      | 0.507164                | 0.905106  | -0.062684 | 54        | 1         | 0        | -5.460664 | 0.770753  | -2.317080 |
| 20     | 6      | 0      | 1.351298                | -0.107852 | -0.377503 | 55        | 1         | 0        | -5.956440 | 2.274589  | -1.478634 |
| 21     | 79     | 0      | -1.517666               | 0.470466  | 0.021811  | 56        | 1         | 0        | -4.232022 | 2.008131  | -1.872549 |
| 22     | 6      | 0      | 0.935291                | -1.523620 | -0.512128 | 57        | 1         | 0        | -5.470397 | 0.553284  | 2.432647  |
| 23     | 6      | 0      | 0.364565                | -2.208137 | 0.572700  | 58        | 1         | 0        | -4.935624 | -0.853500 | 3.403382  |
| 24     | 6      | 0      | -0.042777               | -3.536047 | 0.437023  | 59        | 1         | 0        | -3.747061 | 0.394994  | 2.926736  |
| 25     | 6      | 0      | 0.116447                | -4.194628 | -0.783346 | -----     |           |          |           |           |           |
| 26     | 6      | 0      | 0.689516                | -3.523641 | -1.866979 | -----     |           |          |           |           |           |
| 27     | 6      | 0      | 1.105032                | -2.199957 | -1.729254 | -----     |           |          |           |           |           |
| 28     | 1      | 0      | 4.330539                | 2.744126  | -2.129953 | -----     |           |          |           |           |           |
| 29     | 1      | 0      | 5.501573                | 0.893790  | -3.189523 | -----     |           |          |           |           |           |
| 30     | 1      | 0      | 5.390729                | -1.420639 | -2.306831 | -----     |           |          |           |           |           |
| 31     | 1      | 0      | 4.842769                | -3.569079 | 0.624493  | -----     |           |          |           |           |           |

  

| TS2 (NIMGA = 1, 463.72i cm <sup>-1</sup> ) |        |        |                         |   |   |  |  |  |  |  |  |
|--------------------------------------------|--------|--------|-------------------------|---|---|--|--|--|--|--|--|
| -----                                      |        |        |                         |   |   |  |  |  |  |  |  |
| Center                                     | Atomic | Atomic | Coordinates (Angstroms) |   |   |  |  |  |  |  |  |
| Number                                     | Number | Type   | X                       | Y | Z |  |  |  |  |  |  |
| -----                                      |        |        |                         |   |   |  |  |  |  |  |  |

|    |    |   |           |           |           |       |    |   |           |           |           |
|----|----|---|-----------|-----------|-----------|-------|----|---|-----------|-----------|-----------|
| 1  | 6  | 0 | 4.634642  | 1.505747  | -1.426150 | 36    | 1  | 0 | 0.310170  | 5.383942  | 0.926661  |
| 2  | 6  | 0 | 5.383208  | 0.409051  | -1.787605 | 37    | 1  | 0 | 2.626859  | 5.848360  | 0.143128  |
| 3  | 6  | 0 | 5.084847  | -0.897505 | -1.282111 | 38    | 1  | 0 | 4.069834  | 4.012257  | -0.609412 |
| 4  | 6  | 0 | 3.916936  | -1.071770 | -0.609172 | 39    | 1  | 0 | -0.009331 | -1.947604 | 1.214589  |
| 5  | 6  | 0 | 2.962805  | 0.045528  | -0.441828 | 40    | 1  | 0 | -1.109279 | -4.027524 | 0.431810  |
| 6  | 6  | 0 | 3.417382  | 1.378086  | -0.690414 | 41    | 1  | 0 | -0.789592 | -4.798140 | -1.911282 |
| 7  | 6  | 0 | 3.558145  | -1.801409 | 0.624119  | 42    | 1  | 0 | 0.626223  | -3.476669 | -3.466777 |
| 8  | 6  | 0 | 2.756826  | -0.780674 | 1.151294  | 43    | 1  | 0 | 1.718269  | -1.390437 | -2.687986 |
| 9  | 6  | 0 | 3.944497  | -2.851373 | 1.435098  | 44    | 15 | 0 | -3.698728 | -0.059593 | 0.005944  |
| 10 | 6  | 0 | 3.486058  | -2.820841 | 2.768315  | 45    | 8  | 0 | -4.213668 | -0.720322 | -1.472680 |
| 11 | 6  | 0 | 2.731758  | -1.758022 | 3.267795  | 46    | 8  | 0 | -4.911403 | 1.095326  | 0.272835  |
| 12 | 6  | 0 | 2.342140  | -0.670282 | 2.451246  | 47    | 8  | 0 | -4.179877 | -1.279806 | 1.087595  |
| 13 | 6  | 0 | 2.589549  | 2.459719  | -0.280686 | 48    | 6  | 0 | -3.533424 | -1.904284 | -1.989062 |
| 14 | 6  | 0 | 1.241642  | 2.182215  | 0.154182  | 49    | 6  | 0 | -5.154179 | 2.132688  | -0.727380 |
| 15 | 6  | 0 | 0.447513  | 3.279374  | 0.582426  | 50    | 6  | 0 | -4.420331 | -0.949514 | 2.489763  |
| 16 | 6  | 0 | 0.935968  | 4.565033  | 0.586007  | 51    | 1  | 0 | -3.741638 | -2.762573 | -1.343166 |
| 17 | 6  | 0 | 2.250659  | 4.830505  | 0.137609  | 52    | 1  | 0 | -3.951717 | -2.066398 | -2.981357 |
| 18 | 6  | 0 | 3.052239  | 3.800962  | -0.295281 | 53    | 1  | 0 | -2.449429 | -1.737907 | -2.062826 |
| 19 | 6  | 0 | 0.666948  | 0.876370  | 0.031455  | 54    | 1  | 0 | -5.544690 | 1.681022  | -1.642388 |
| 20 | 6  | 0 | 1.487475  | -0.212042 | -0.287232 | 55    | 1  | 0 | -5.896738 | 2.791643  | -0.280309 |
| 21 | 79 | 0 | -1.376293 | 0.532400  | 0.075198  | 56    | 1  | 0 | -4.235714 | 2.694800  | -0.937668 |
| 22 | 6  | 0 | 0.911971  | -1.523509 | -0.691536 | 57    | 1  | 0 | -5.268602 | -0.265943 | 2.571763  |
| 23 | 6  | 0 | 0.116737  | -2.277728 | 0.184734  | 58    | 1  | 0 | -4.648966 | -1.898695 | 2.971968  |
| 24 | 6  | 0 | -0.496601 | -3.449587 | -0.253984 | 59    | 1  | 0 | -3.525799 | -0.506026 | 2.945237  |
| 25 | 6  | 0 | -0.316317 | -3.881954 | -1.570549 | ----- |    |   |           |           |           |
| 26 | 6  | 0 | 0.482437  | -3.142021 | -2.443913 |       |    |   |           |           |           |
| 27 | 6  | 0 | 1.100300  | -1.970262 | -2.005908 |       |    |   |           |           |           |
| 28 | 1  | 0 | 4.951095  | 2.490887  | -1.752890 |       |    |   |           |           |           |
| 29 | 1  | 0 | 6.277875  | 0.550160  | -2.386052 |       |    |   |           |           |           |
| 30 | 1  | 0 | 5.839580  | -1.676935 | -1.318623 |       |    |   |           |           |           |
| 31 | 1  | 0 | 4.598132  | -3.645428 | 1.089704  |       |    |   |           |           |           |
| 32 | 1  | 0 | 3.746545  | -3.637347 | 3.434232  | 1     | 6  | 0 | 5.044171  | -0.790270 | -1.050663 |
| 33 | 1  | 0 | 2.409337  | -1.772431 | 4.304430  | 2     | 6  | 0 | 5.667059  | 0.444156  | -1.221644 |
| 34 | 1  | 0 | 1.725144  | 0.141093  | 2.823051  | 3     | 6  | 0 | 4.963852  | 1.649049  | -1.069310 |
| 35 | 1  | 0 | -0.570900 | 3.073602  | 0.905010  | 4     | 6  | 0 | 3.630178  | 1.595460  | -0.674103 |

**Int3 (NIMGA = 0)**

-----

| Center | Atomic | Atomic | Coordinates (Angstroms) |   |   |
|--------|--------|--------|-------------------------|---|---|
| Number | Number | Type   | X                       | Y | Z |

-----

|    |    |   |           |           |           |    |    |   |           |           |           |
|----|----|---|-----------|-----------|-----------|----|----|---|-----------|-----------|-----------|
| 5  | 6  | 0 | 3.053546  | 0.353919  | -0.399281 | 40 | 1  | 0 | -0.506263 | 1.279542  | 4.206523  |
| 6  | 6  | 0 | 3.693830  | -0.851433 | -0.647542 | 41 | 1  | 0 | 1.164485  | -0.046876 | 5.485703  |
| 7  | 6  | 0 | 2.555695  | 2.594265  | -0.636414 | 42 | 1  | 0 | 3.063227  | -1.114318 | 4.287267  |
| 8  | 6  | 0 | 1.331918  | 1.943327  | -0.347211 | 43 | 1  | 0 | 3.280860  | -0.892269 | 1.852771  |
| 9  | 6  | 0 | 2.586313  | 3.951550  | -0.936156 | 44 | 15 | 0 | -3.629356 | 0.016775  | -0.236717 |
| 10 | 6  | 0 | 1.385278  | 4.663607  | -0.972499 | 45 | 8  | 0 | -4.469814 | -0.382035 | 1.182417  |
| 11 | 6  | 0 | 0.173692  | 4.018578  | -0.723259 | 46 | 8  | 0 | -4.660230 | -0.617893 | -1.417550 |
| 12 | 6  | 0 | 0.141325  | 2.655258  | -0.402960 | 47 | 8  | 0 | -3.949387 | 1.677750  | -0.369283 |
| 13 | 6  | 0 | 2.869469  | -2.056682 | -0.610975 | 48 | 6  | 0 | -4.109173 | 0.271815  | 2.438800  |
| 14 | 6  | 0 | 1.432958  | -1.929945 | -0.502343 | 49 | 6  | 0 | -5.069842 | -2.021824 | -1.368920 |
| 15 | 6  | 0 | 0.642962  | -3.108877 | -0.596344 | 50 | 6  | 0 | -3.958979 | 2.330638  | -1.679559 |
| 16 | 6  | 0 | 1.212971  | -4.356188 | -0.750529 | 51 | 1  | 0 | -4.369380 | 1.332318  | 2.391510  |
| 17 | 6  | 0 | 2.609820  | -4.463594 | -0.819382 | 52 | 1  | 0 | -4.700339 | -0.230930 | 3.202489  |
| 18 | 6  | 0 | 3.418502  | -3.333240 | -0.755953 | 53 | 1  | 0 | -3.039565 | 0.143151  | 2.653621  |
| 19 | 6  | 0 | 0.779795  | -0.676939 | -0.296680 | 54 | 1  | 0 | -5.669850 | -2.201559 | -0.473986 |
| 20 | 6  | 0 | 1.633799  | 0.494686  | 0.047920  | 55 | 1  | 0 | -5.666635 | -2.172034 | -2.266870 |
| 21 | 79 | 0 | -1.274504 | -0.459564 | -0.275181 | 56 | 1  | 0 | -4.194471 | -2.682013 | -1.388650 |
| 22 | 6  | 0 | 1.507419  | 0.327961  | 1.628208  | 57 | 1  | 0 | -4.744198 | 1.900018  | -2.304669 |
| 23 | 6  | 0 | 0.433786  | 0.923029  | 2.307606  | 58 | 1  | 0 | -4.169547 | 3.378324  | -1.470209 |
| 24 | 6  | 0 | 0.315297  | 0.791281  | 3.690620  | 59 | 1  | 0 | -2.981410 | 2.234690  | -2.168634 |
| 25 | 6  | 0 | 1.255366  | 0.053715  | 4.408784  |    |    |   |           |           |           |
| 26 | 6  | 0 | 2.319178  | -0.548382 | 3.735512  |    |    |   |           |           |           |
| 27 | 6  | 0 | 2.440906  | -0.422037 | 2.353509  |    |    |   |           |           |           |
| 28 | 1  | 0 | 5.600745  | -1.696236 | -1.271041 |    |    |   |           |           |           |
| 29 | 1  | 0 | 6.706534  | 0.472680  | -1.532861 |    |    |   |           |           |           |
| 30 | 1  | 0 | 5.448454  | 2.594363  | -1.296166 |    |    |   |           |           |           |
| 31 | 1  | 0 | 3.526878  | 4.449622  | -1.155632 |    |    |   |           |           |           |
| 32 | 1  | 0 | 1.392940  | 5.722517  | -1.211109 |    |    |   |           |           |           |
| 33 | 1  | 0 | -0.756290 | 4.576951  | -0.777492 |    |    |   |           |           |           |
| 34 | 1  | 0 | -0.820170 | 2.176936  | -0.217788 |    |    |   |           |           |           |
| 35 | 1  | 0 | -0.437922 | -3.004993 | -0.524969 |    |    |   |           |           |           |
| 36 | 1  | 0 | 0.592698  | -5.243494 | -0.810945 |    |    |   |           |           |           |
| 37 | 1  | 0 | 3.068752  | -5.441604 | -0.930017 |    |    |   |           |           |           |
| 38 | 1  | 0 | 4.495499  | -3.450297 | -0.821280 |    |    |   |           |           |           |
| 39 | 1  | 0 | -0.289991 | 1.529595  | 1.772432  |    |    |   |           |           |           |

  

| TS3 (NIMGA = 1, 207.84i cm <sup>-1</sup> ) |        |        |                         |           |           |  |  |  |  |  |  |
|--------------------------------------------|--------|--------|-------------------------|-----------|-----------|--|--|--|--|--|--|
| -----                                      |        |        |                         |           |           |  |  |  |  |  |  |
| Center                                     | Atomic | Atomic | Coordinates (Angstroms) |           |           |  |  |  |  |  |  |
| Number                                     | Number | Type   | X                       | Y         | Z         |  |  |  |  |  |  |
| -----                                      |        |        |                         |           |           |  |  |  |  |  |  |
| 1                                          | 6      | 0      | 4.907264                | -0.949476 | -1.398048 |  |  |  |  |  |  |
| 2                                          | 6      | 0      | 5.584084                | 0.247175  | -1.619676 |  |  |  |  |  |  |
| 3                                          | 6      | 0      | 4.984278                | 1.498618  | -1.387327 |  |  |  |  |  |  |
| 4                                          | 6      | 0      | 3.695938                | 1.520307  | -0.876089 |  |  |  |  |  |  |
| 5                                          | 6      | 0      | 3.060142                | 0.305632  | -0.583449 |  |  |  |  |  |  |
| 6                                          | 6      | 0      | 3.594625                | -0.940849 | -0.881030 |  |  |  |  |  |  |
| 7                                          | 6      | 0      | 2.702003                | 2.588828  | -0.689055 |  |  |  |  |  |  |
| 8                                          | 6      | 0      | 1.465667                | 2.005323  | -0.309994 |  |  |  |  |  |  |



|    |    |   |           |           |           |                         |        |        |                         |           |           |
|----|----|---|-----------|-----------|-----------|-------------------------|--------|--------|-------------------------|-----------|-----------|
| 9  | 6  | 0 | 2.794287  | 3.952527  | -0.930884 | 44                      | 15     | 0      | -3.601391               | 0.073188  | -0.394066 |
| 10 | 6  | 0 | 1.643182  | 4.738027  | -0.813342 | 45                      | 8      | 0      | -3.940843               | 1.638351  | 0.130376  |
| 11 | 6  | 0 | 0.416949  | 4.159488  | -0.482947 | 46                      | 8      | 0      | -4.741275               | -0.943461 | 0.385610  |
| 12 | 6  | 0 | 0.319686  | 2.786152  | -0.229523 | 47                      | 8      | 0      | -4.311750               | 0.083568  | -1.931407 |
| 13 | 6  | 0 | 2.727856  | -2.108904 | -0.693903 | 48                      | 6      | 0      | -5.265508               | 2.238468  | -0.076125 |
| 14 | 6  | 0 | 1.380679  | -1.924854 | -0.256428 | 49                      | 6      | 0      | -4.607456               | -1.187553 | 1.816779  |
| 15 | 6  | 0 | 0.565319  | -3.057362 | -0.093220 | 50                      | 6      | 0      | -4.492170               | -1.168756 | -2.665002 |
| 16 | 6  | 0 | 1.035898  | -4.336738 | -0.353358 | 51                      | 1      | 0      | -6.048338               | 1.564199  | 0.285153  |
| 17 | 6  | 0 | 2.352409  | -4.511061 | -0.789495 | 52                      | 1      | 0      | -5.249547               | 3.156363  | 0.509259  |
| 18 | 6  | 0 | 3.181802  | -3.409766 | -0.956215 | 53                      | 1      | 0      | -5.410097               | 2.452798  | -1.136452 |
| 19 | 6  | 0 | 0.805410  | -0.587028 | 0.030083  | 54                      | 1      | 0      | -4.783475               | -0.263217 | 2.377667  |
| 20 | 6  | 0 | 1.696638  | 0.537163  | -0.093635 | 55                      | 1      | 0      | -5.373541               | -1.922484 | 2.060022  |
| 21 | 79 | 0 | -1.264427 | -0.339893 | -0.107337 | 56                      | 1      | 0      | -3.616834               | -1.593152 | 2.058060  |
| 22 | 6  | 0 | 1.460034  | 0.065298  | 1.574298  | 57                      | 1      | 0      | -5.202350               | -1.810494 | -2.138143 |
| 23 | 6  | 0 | 0.582611  | 0.847530  | 2.352143  | 58                      | 1      | 0      | -4.889522               | -0.872789 | -3.634443 |
| 24 | 6  | 0 | 0.722930  | 0.899763  | 3.732069  | 59                      | 1      | 0      | -3.531319               | -1.679972 | -2.798859 |
| 25 | 6  | 0 | 1.743934  | 0.180301  | 4.359095  | -----                   |        |        |                         |           |           |
| 26 | 6  | 0 | 2.624300  | -0.592815 | 3.597807  | <b>Int4 (NIMGA = 0)</b> |        |        |                         |           |           |
| 27 | 6  | 0 | 2.485919  | -0.651919 | 2.217619  | -----                   |        |        |                         |           |           |
| 28 | 1  | 0 | 5.398016  | -1.884187 | -1.650666 | -----                   |        |        |                         |           |           |
| 29 | 1  | 0 | 6.592894  | 0.213131  | -2.019764 | Center                  | Atomic | Atomic | Coordinates (Angstroms) |           |           |
| 30 | 1  | 0 | 5.514529  | 2.412974  | -1.636856 | Number                  | Number | Type   | X                       | Y         | Z         |
| 31 | 1  | 0 | 3.738528  | 4.401850  | -1.226007 | -----                   |        |        |                         |           |           |
| 32 | 1  | 0 | 1.699343  | 5.805411  | -1.003163 | 1                       | 6      | 0      | -2.804342               | -2.923632 | -1.550319 |
| 33 | 1  | 0 | -0.474421 | 4.776658  | -0.431709 | 2                       | 6      | 0      | -2.440020               | -4.072249 | -0.857524 |
| 34 | 1  | 0 | -0.655373 | 2.353027  | -0.006012 | 3                       | 6      | 0      | -1.724338               | -4.026438 | 0.358939  |
| 35 | 1  | 0 | -0.457649 | -2.914636 | 0.251262  | 4                       | 6      | 0      | -1.365465               | -2.788449 | 0.861400  |
| 36 | 1  | 0 | 0.385737  | -5.195105 | -0.219045 | 5                       | 6      | 0      | -1.725717               | -1.635051 | 0.134835  |
| 37 | 1  | 0 | 2.729795  | -5.507265 | -0.997899 | 6                       | 6      | 0      | -2.453008               | -1.646685 | -1.053022 |
| 38 | 1  | 0 | 4.202374  | -3.563977 | -1.293304 | 7                       | 6      | 0      | -0.665690               | -2.333447 | 2.070475  |
| 39 | 1  | 0 | -0.206816 | 1.420354  | 1.877138  | 8                       | 6      | 0      | -0.627839               | -0.907542 | 2.074051  |
| 40 | 1  | 0 | 0.039007  | 1.503788  | 4.319057  | 9                       | 6      | 0      | -0.088134               | -3.051729 | 3.110435  |
| 41 | 1  | 0 | 1.854346  | 0.223730  | 5.438122  | 10                      | 6      | 0      | 0.533615                | -2.354217 | 4.151012  |
| 42 | 1  | 0 | 3.420185  | -1.149565 | 4.081039  | 11                      | 6      | 0      | 0.580807                | -0.957119 | 4.149404  |
| 43 | 1  | 0 | 3.173811  | -1.262472 | 1.642655  | 12                      | 6      | 0      | 0.003393                | -0.219943 | 3.110694  |

|    |    |   |           |           |           |                                                  |        |        |                         |           |           |
|----|----|---|-----------|-----------|-----------|--------------------------------------------------|--------|--------|-------------------------|-----------|-----------|
| 13 | 6  | 0 | -2.791734 | -0.357644 | -1.631201 | 48                                               | 6      | 0      | 3.900799                | 2.485351  | -0.430679 |
| 14 | 6  | 0 | -2.403762 | 0.849415  | -0.955603 | 49                                               | 6      | 0      | 2.811267                | -0.405694 | -3.816491 |
| 15 | 6  | 0 | -2.800243 | 2.090767  | -1.503323 | 50                                               | 6      | 0      | 3.752347                | -1.899941 | 0.590108  |
| 16 | 6  | 0 | -3.520854 | 2.156180  | -2.681030 | 51                                               | 1      | 0      | 4.699228                | 2.078722  | 0.193825  |
| 17 | 6  | 0 | -3.874464 | 0.976491  | -3.353359 | 52                                               | 1      | 0      | 4.237349                | 3.380549  | -0.950587 |
| 18 | 6  | 0 | -3.517979 | -0.254658 | -2.830898 | 53                                               | 1      | 0      | 3.013967                | 2.712663  | 0.174925  |
| 19 | 6  | 0 | -1.640685 | 0.817994  | 0.290756  | 54                                               | 1      | 0      | 3.333449                | 0.520485  | -4.066867 |
| 20 | 6  | 0 | -1.283297 | -0.439987 | 0.817951  | 55                                               | 1      | 0      | 3.102184                | -1.205360 | -4.495114 |
| 21 | 79 | 0 | 0.658880  | 0.038166  | -0.319959 | 56                                               | 1      | 0      | 1.724452                | -0.263137 | -3.849552 |
| 22 | 6  | 0 | -1.395349 | 2.064523  | 1.068509  | 57                                               | 1      | 0      | 3.865741                | -2.664139 | -0.183616 |
| 23 | 6  | 0 | -2.089148 | 2.259883  | 2.270505  | 58                                               | 1      | 0      | 4.523204                | -2.012117 | 1.350357  |
| 24 | 6  | 0 | -1.863875 | 3.406206  | 3.031874  | 59                                               | 1      | 0      | 2.758637                | -1.959236 | 1.057037  |
| 25 | 6  | 0 | -0.943410 | 4.363783  | 2.603605  | -----                                            |        |        |                         |           |           |
| 26 | 6  | 0 | -0.257178 | 4.182024  | 1.401720  |                                                  |        |        |                         |           |           |
| 27 | 6  | 0 | -0.488373 | 3.042285  | 0.632991  | <b>TS1' (NIMGA = 1, 398.84i cm<sup>-1</sup>)</b> |        |        |                         |           |           |
| 28 | 1  | 0 | -3.372560 | -3.023078 | -2.469982 | -----                                            |        |        |                         |           |           |
| 29 | 1  | 0 | -2.728181 | -5.039353 | -1.258169 | Center                                           | Atomic | Atomic | Coordinates (Angstroms) |           |           |
| 30 | 1  | 0 | -1.482643 | -4.948044 | 0.880769  | Number                                           | Number | Type   | X                       | Y         | Z         |
| 31 | 1  | 0 | -0.122441 | -4.137945 | 3.120589  | -----                                            |        |        |                         |           |           |
| 32 | 1  | 0 | 0.982214  | -2.904303 | 4.972553  | 1                                                | 6      | 0      | 2.447836                | 0.880315  | -1.761772 |
| 33 | 1  | 0 | 1.066375  | -0.435391 | 4.968167  | 2                                                | 6      | 0      | 3.014648                | 2.161677  | -1.580168 |
| 34 | 1  | 0 | 0.044862  | 0.866628  | 3.121568  | 3                                                | 6      | 0      | 4.084398                | 2.400476  | -0.704402 |
| 35 | 1  | 0 | -2.542042 | 3.006175  | -0.980247 | 4                                                | 6      | 0      | 4.601638                | 1.281474  | -0.080172 |
| 36 | 1  | 0 | -3.818697 | 3.119979  | -3.080929 | 5                                                | 6      | 0      | 4.069801                | -0.032939 | -0.280438 |
| 37 | 1  | 0 | -4.439189 | 1.028248  | -4.278884 | 6                                                | 6      | 0      | 3.004786                | -0.280075 | -1.101413 |
| 38 | 1  | 0 | -3.813563 | -1.159032 | -3.353936 | 7                                                | 6      | 0      | 5.594540                | 0.735606  | 0.896093  |
| 39 | 1  | 0 | -2.798697 | 1.507760  | 2.608218  | 8                                                | 6      | 0      | 5.065561                | -0.576970 | 0.711226  |
| 40 | 1  | 0 | -2.407752 | 3.551176  | 3.960104  | 9                                                | 6      | 0      | 6.631236                | 0.998517  | 1.759333  |
| 41 | 1  | 0 | -0.767030 | 5.252975  | 3.200722  | 10                                               | 6      | 0      | 7.145427                | -0.121654 | 2.452968  |
| 42 | 1  | 0 | 0.449922  | 4.931914  | 1.059482  | 11                                               | 6      | 0      | 6.625846                | -1.402249 | 2.273729  |
| 43 | 1  | 0 | 0.031633  | 2.908590  | -0.316665 | 12                                               | 6      | 0      | 5.553558                | -1.666479 | 1.385694  |
| 44 | 15 | 0 | 2.882254  | 0.040796  | -1.114914 | 13                                               | 6      | 0      | 2.349190                | -1.578946 | -1.257746 |
| 45 | 8  | 0 | 3.572313  | 1.533802  | -1.494866 | 14                                               | 6      | 0      | 0.937557                | -1.655094 | -1.145669 |
| 46 | 8  | 0 | 3.232927  | -0.867983 | -2.491004 | 15                                               | 6      | 0      | 0.315219                | -2.903843 | -1.262523 |
| 47 | 8  | 0 | 3.978549  | -0.573899 | 0.013602  | 16                                               | 6      | 0      | 1.061641                | -4.057210 | -1.491652 |

|    |    |   |           |           |           |                          |        |        |                         |           |           |
|----|----|---|-----------|-----------|-----------|--------------------------|--------|--------|-------------------------|-----------|-----------|
| 17 | 6  | 0 | 2.451222  | -3.980031 | -1.585600 | 52                       | 1      | 0      | -4.435376               | -2.547294 | 3.637657  |
| 18 | 6  | 0 | 3.089219  | -2.746804 | -1.461354 | 53                       | 1      | 0      | -2.895990               | -1.787733 | 3.134764  |
| 19 | 6  | 0 | 0.175358  | -0.449112 | -0.829742 | 54                       | 1      | 0      | -6.054530               | -2.321665 | -0.342634 |
| 20 | 6  | 0 | 0.524239  | 0.807703  | -0.860936 | 55                       | 1      | 0      | -6.442650               | -1.287750 | -1.753849 |
| 21 | 79 | 0 | -1.795439 | -0.499911 | -0.080458 | 56                       | 1      | 0      | -4.809639               | -2.001214 | -1.604527 |
| 22 | 6  | 0 | 0.090258  | 2.171959  | -0.687321 | 57                       | 1      | 0      | -4.341856               | 3.069821  | 1.748432  |
| 23 | 6  | 0 | -0.685646 | 2.795586  | -1.682549 | 58                       | 1      | 0      | -3.210467               | 2.434181  | 0.515644  |
| 24 | 6  | 0 | -1.130988 | 4.102256  | -1.499510 | 59                       | 1      | 0      | -4.986998               | 2.418510  | 0.208961  |
| 25 | 6  | 0 | -0.801767 | 4.795417  | -0.331582 | -----                    |        |        |                         |           |           |
| 26 | 6  | 0 | -0.028594 | 4.181964  | 0.659401  |                          |        |        |                         |           |           |
| 27 | 6  | 0 | 0.421496  | 2.877604  | 0.484169  | <b>Int2' (NIMGA = 0)</b> |        |        |                         |           |           |
| 28 | 1  | 0 | 1.871666  | 0.717527  | -2.675496 | -----                    |        |        |                         |           |           |
| 29 | 1  | 0 | 2.591343  | 2.993876  | -2.138194 | Center                   | Atomic | Atomic | Coordinates (Angstroms) |           |           |
| 30 | 1  | 0 | 4.478368  | 3.400076  | -0.561180 | Number                   | Number | Type   | X                       | Y         | Z         |
| 31 | 1  | 0 | 7.046928  | 1.988163  | 1.915901  | -----                    |        |        |                         |           |           |
| 32 | 1  | 0 | 7.969590  | 0.019976  | 3.145230  | 1                        | 6      | 0      | 0.489834                | -2.827405 | -0.531963 |
| 33 | 1  | 0 | 7.059213  | -2.226681 | 2.832166  | 2                        | 6      | 0      | 1.044420                | -1.537976 | -0.494463 |
| 34 | 1  | 0 | 5.163488  | -2.671970 | 1.267208  | 3                        | 6      | 0      | 2.458911                | -1.420714 | -0.619251 |
| 35 | 1  | 0 | -0.766805 | -2.965710 | -1.165479 | 4                        | 6      | 0      | 3.251065                | -2.572802 | -0.792469 |
| 36 | 1  | 0 | 0.560950  | -5.015368 | -1.586798 | 5                        | 6      | 0      | 2.671736                | -3.829209 | -0.842456 |
| 37 | 1  | 0 | 3.036800  | -4.877590 | -1.757856 | 6                        | 6      | 0      | 1.282597                | -3.954598 | -0.702286 |
| 38 | 1  | 0 | 4.170869  | -2.675861 | -1.551131 | 7                        | 6      | 0      | 0.194375                | -0.359916 | -0.320358 |
| 39 | 1  | 0 | -0.937411 | 2.241829  | -2.584266 | 8                        | 6      | 0      | 0.716874                | 0.891004  | -0.423456 |
| 40 | 1  | 0 | -1.730943 | 4.581993  | -2.266592 | 9                        | 6      | 0      | 2.204483                | 1.094409  | -0.743010 |
| 41 | 1  | 0 | -1.145771 | 5.816030  | -0.193729 | 10                       | 6      | 0      | 3.059995                | -0.120688 | -0.498761 |
| 42 | 1  | 0 | 0.221514  | 4.723915  | 1.566065  | 11                       | 6      | 0      | 2.790113                | 2.416640  | -0.386217 |
| 43 | 1  | 0 | 1.029770  | 2.388375  | 1.241267  | 12                       | 6      | 0      | 4.100572                | 2.606895  | -0.032161 |
| 44 | 15 | 0 | -4.023334 | -0.387392 | 0.774018  | 13                       | 6      | 0      | 4.875855                | 1.441986  | 0.060690  |
| 45 | 8  | 0 | -4.568482 | -1.569845 | 1.854895  | 14                       | 6      | 0      | 4.365688                | 0.131418  | -0.172913 |
| 46 | 8  | 0 | -5.289065 | -0.364126 | -0.351282 | 15                       | 6      | 0      | 6.199627                | 0.898713  | 0.425571  |
| 47 | 8  | 0 | -4.333114 | 1.034219  | 1.646133  | 16                       | 6      | 0      | 5.714471                | -0.431759 | 0.232251  |
| 48 | 6  | 0 | -3.984232 | -1.662130 | 3.192511  | 17                       | 6      | 0      | 7.480140                | 1.175138  | 0.850455  |
| 49 | 6  | 0 | -5.665028 | -1.590025 | -1.054500 | 18                       | 6      | 0      | 8.295241                | 0.047066  | 1.085450  |
| 50 | 6  | 0 | -4.206313 | 2.322491  | 0.968334  | 19                       | 6      | 0      | 7.819390                | -1.251787 | 0.906481  |
| 51 | 1  | 0 | -4.239715 | -0.770505 | 3.769952  | 20                       | 6      | 0      | 6.497239                | -1.530053 | 0.473287  |

|    |    |   |           |           |           |                                                    |        |        |                         |           |           |
|----|----|---|-----------|-----------|-----------|----------------------------------------------------|--------|--------|-------------------------|-----------|-----------|
| 21 | 79 | 0 | -1.850795 | -0.520640 | 0.007606  | 56                                                 | 1      | 0      | -4.254629               | -2.885334 | -1.406875 |
| 22 | 1  | 0 | -2.136013 | 3.794305  | 1.832103  | 57                                                 | 1      | 0      | -5.361616               | 1.711909  | -1.376121 |
| 23 | 6  | 0 | -0.126482 | 2.110755  | -0.353124 | 58                                                 | 1      | 0      | -5.065933               | 2.969708  | -0.133854 |
| 24 | 6  | 0 | -0.291645 | 2.945906  | -1.469838 | 59                                                 | 1      | 0      | -3.679306               | 2.106011  | -0.858761 |
| 25 | 6  | 0 | -1.114106 | 4.070649  | -1.400155 | -----                                              |        |        |                         |           |           |
| 26 | 6  | 0 | -1.780257 | 4.379900  | -0.212432 | <b>TS2'</b> (NIMGA = 1, 983.08i cm <sup>-1</sup> ) |        |        |                         |           |           |
| 27 | 6  | 0 | -1.621618 | 3.558737  | 0.904898  |                                                    |        |        |                         |           |           |
| 28 | 6  | 0 | -0.797490 | 2.434696  | 0.837826  |                                                    |        |        |                         |           |           |
| 29 | 1  | 0 | -0.662052 | 1.799807  | 1.710579  |                                                    |        |        |                         |           |           |
| 30 | 1  | 0 | -2.417955 | 5.257261  | -0.158573 | -----                                              |        |        |                         |           |           |
| 31 | 1  | 0 | -1.241264 | 4.700731  | -2.275596 | Center                                             | Atomic | Atomic | Coordinates (Angstroms) |           |           |
| 32 | 1  | 0 | 0.200846  | 2.696250  | -2.408959 | Number                                             | Number | Type   | X                       | Y         | Z         |
| 33 | 1  | 0 | -0.588484 | -2.927347 | -0.428349 | -----                                              |        |        |                         |           |           |
| 34 | 1  | 0 | 0.823426  | -4.937910 | -0.731232 | 1                                                  | 6      | 0      | -0.460847               | -2.839154 | 0.375305  |
| 35 | 1  | 0 | 3.286437  | -4.710263 | -0.995166 | 2                                                  | 6      | 0      | -1.028721               | -1.545135 | 0.338484  |
| 36 | 1  | 0 | 4.322749  | -2.461641 | -0.934867 | 3                                                  | 6      | 0      | -2.452612               | -1.427034 | 0.324107  |
| 37 | 1  | 0 | 2.175246  | 1.180641  | -1.865420 | 4                                                  | 6      | 0      | -3.236681               | -2.594819 | 0.375254  |
| 38 | 1  | 0 | 2.122395  | 3.271325  | -0.472369 | 5                                                  | 6      | 0      | -2.649155               | -3.846332 | 0.422847  |
| 39 | 1  | 0 | 4.492330  | 3.593458  | 0.185508  | 6                                                  | 6      | 0      | -1.250076               | -3.971764 | 0.416998  |
| 40 | 1  | 0 | 7.859543  | 2.179879  | 1.001922  | 7                                                  | 6      | 0      | -0.173789               | -0.386203 | 0.287572  |
| 41 | 1  | 0 | 6.159598  | -2.554828 | 0.361070  | 8                                                  | 6      | 0      | -0.716264               | 0.892394  | 0.366212  |
| 42 | 1  | 0 | 9.318197  | 0.192427  | 1.416896  | 9                                                  | 6      | 0      | -2.250566               | 1.071879  | 0.420627  |
| 43 | 1  | 0 | 8.486541  | -2.084309 | 1.108973  | 10                                                 | 6      | 0      | -3.071223               | -0.123727 | 0.258093  |
| 44 | 15 | 0 | -4.227980 | -0.503780 | 0.342526  | 11                                                 | 6      | 0      | -2.823748               | 2.379640  | 0.423087  |
| 45 | 8  | 0 | -4.908096 | -1.306859 | 1.676118  | 12                                                 | 6      | 0      | -4.187746               | 2.582441  | 0.251400  |
| 46 | 8  | 0 | -5.231177 | -1.076978 | -0.903050 | 13                                                 | 6      | 0      | -4.956251               | 1.442364  | 0.067119  |
| 47 | 8  | 0 | -4.862260 | 1.059838  | 0.555476  | 14                                                 | 6      | 0      | -4.417885               | 0.130559  | 0.074370  |
| 48 | 6  | 0 | -4.614160 | -0.835136 | 3.025258  | 15                                                 | 6      | 0      | -6.327751               | 0.899846  | -0.181348 |
| 49 | 6  | 0 | -5.262745 | -2.506330 | -1.195694 | 16                                                 | 6      | 0      | -5.805055               | -0.427271 | -0.190665 |
| 50 | 6  | 0 | -4.727431 | 2.016809  | -0.539229 | 17                                                 | 6      | 0      | -7.654343               | 1.178345  | -0.385570 |
| 51 | 1  | 0 | -5.068633 | 0.146350  | 3.182499  | 18                                                 | 6      | 0      | -8.486167               | 0.053905  | -0.613514 |
| 52 | 1  | 0 | -5.061802 | -1.571558 | 3.690956  | 19                                                 | 6      | 0      | -7.979380               | -1.240108 | -0.633434 |
| 53 | 1  | 0 | -3.531235 | -0.789701 | 3.197829  | 20                                                 | 6      | 0      | -6.603259               | -1.517689 | -0.421283 |
| 54 | 1  | 0 | -5.708442 | -3.047846 | -0.357274 | 21                                                 | 79     | 0      | 1.883229                | -0.499033 | 0.037739  |
| 55 | 1  | 0 | -5.885360 | -2.604151 | -2.083616 | 22                                                 | 1      | 0      | 0.963027                | 4.594670  | -1.885533 |
|    |    |   |           |           |           | 23                                                 | 6      | 0      | 0.130246                | 2.115204  | 0.297905  |
|    |    |   |           |           |           | 24                                                 | 6      | 0      | 0.997828                | 2.451338  | 1.346615  |

|    |    |   |           |           |           |
|----|----|---|-----------|-----------|-----------|
| 25 | 6  | 0 | 1.846231  | 3.553525  | 1.232587  |
| 26 | 6  | 0 | 1.833629  | 4.325817  | 0.069931  |
| 27 | 6  | 0 | 0.972535  | 3.995417  | -0.980059 |
| 28 | 6  | 0 | 0.120407  | 2.898026  | -0.865675 |
| 29 | 1  | 0 | -0.551741 | 2.635586  | -1.680404 |
| 30 | 1  | 0 | 2.489121  | 5.187342  | -0.016634 |
| 31 | 1  | 0 | 2.511324  | 3.810420  | 2.051446  |
| 32 | 1  | 0 | 1.011316  | 1.841083  | 2.248052  |
| 33 | 1  | 0 | 0.624031  | -2.922535 | 0.376531  |
| 34 | 1  | 0 | -0.793244 | -4.955439 | 0.449585  |
| 35 | 1  | 0 | -3.271541 | -4.734376 | 0.469193  |
| 36 | 1  | 0 | -4.317030 | -2.505789 | 0.409197  |
| 37 | 1  | 0 | -1.541862 | 0.953800  | 1.455479  |
| 38 | 1  | 0 | -2.162351 | 3.230144  | 0.560411  |
| 39 | 1  | 0 | -4.603956 | 3.583085  | 0.252206  |
| 40 | 1  | 0 | -8.065331 | 2.182105  | -0.381832 |
| 41 | 1  | 0 | -6.245424 | -2.541735 | -0.459593 |
| 42 | 1  | 0 | -9.547434 | 0.208548  | -0.781048 |
| 43 | 1  | 0 | -8.656093 | -2.068414 | -0.820056 |
| 44 | 15 | 0 | 4.261269  | -0.475908 | -0.266200 |
| 45 | 8  | 0 | 5.076213  | -1.896274 | -0.702305 |
| 46 | 8  | 0 | 5.179265  | 0.020906  | 1.072344  |
| 47 | 8  | 0 | 4.822086  | 0.595018  | -1.458541 |
| 48 | 6  | 0 | 4.913014  | -2.444592 | -2.047365 |
| 49 | 6  | 0 | 5.377959  | -0.892883 | 2.195478  |
| 50 | 6  | 0 | 4.460803  | 2.006289  | -1.359155 |
| 51 | 1  | 0 | 5.350355  | -1.763200 | -2.780858 |
| 52 | 1  | 0 | 5.452417  | -3.390258 | -2.036200 |
| 53 | 1  | 0 | 3.853679  | -2.622556 | -2.270526 |
| 54 | 1  | 0 | 5.957053  | -1.760676 | 1.870955  |
| 55 | 1  | 0 | 5.934869  | -0.318793 | 2.934225  |
| 56 | 1  | 0 | 4.415381  | -1.207930 | 2.617423  |
| 57 | 1  | 0 | 4.917391  | 2.446197  | -0.467259 |
| 58 | 1  | 0 | 4.865208  | 2.469378  | -2.257952 |
| 59 | 1  | 0 | 3.369384  | 2.132686  | -1.332686 |

-----  
**Int3' (NIMGA = 0)**  
 -----

| Center | Atomic | Atomic | Coordinates (Angstroms) |           |           |
|--------|--------|--------|-------------------------|-----------|-----------|
| Number | Number | Type   | X                       | Y         | Z         |
| -----  |        |        |                         |           |           |
| 1      | 6      | 0      | 0.500967                | -2.876853 | 0.143940  |
| 2      | 6      | 0      | 1.042617                | -1.578396 | -0.103885 |
| 3      | 6      | 0      | 2.474054                | -1.407506 | -0.128335 |
| 4      | 6      | 0      | 3.275561                | -2.546007 | 0.034616  |
| 5      | 6      | 0      | 2.711973                | -3.795016 | 0.251851  |
| 6      | 6      | 0      | 1.315357                | -3.969496 | 0.320804  |
| 7      | 6      | 0      | 0.174756                | -0.502896 | -0.341843 |
| 8      | 6      | 0      | 0.722108                | 0.830643  | -0.740433 |
| 9      | 6      | 0      | 2.212545                | 1.034490  | -0.593564 |
| 10     | 6      | 0      | 3.055798                | -0.092927 | -0.305454 |
| 11     | 6      | 0      | 2.742091                | 2.302747  | -0.784916 |
| 12     | 6      | 0      | 4.128850                | 2.567717  | -0.694441 |
| 13     | 6      | 0      | 4.928980                | 1.494275  | -0.400281 |
| 14     | 6      | 0      | 4.413193                | 0.184487  | -0.202065 |
| 15     | 6      | 0      | 6.321308                | 0.995411  | -0.122119 |
| 16     | 6      | 0      | 5.810645                | -0.319278 | 0.091818  |
| 17     | 6      | 0      | 7.650820                | 1.300353  | -0.005215 |
| 18     | 6      | 0      | 8.500622                | 0.220868  | 0.347279  |
| 19     | 6      | 0      | 8.008403                | -1.059891 | 0.566215  |
| 20     | 6      | 0      | 6.629217                | -1.364596 | 0.444486  |
| 21     | 79     | 0      | -1.890062               | -0.551837 | -0.183639 |
| 22     | 1      | 0      | -0.750149               | 3.328185  | 2.928949  |
| 23     | 6      | 0      | -0.122851               | 1.935439  | -0.114307 |
| 24     | 6      | 0      | -1.060668               | 2.642136  | -0.873946 |
| 25     | 6      | 0      | -1.891883               | 3.586315  | -0.266299 |
| 26     | 6      | 0      | -1.784468               | 3.830706  | 1.103224  |
| 27     | 6      | 0      | -0.843921               | 3.131343  | 1.864909  |
| 28     | 6      | 0      | -0.016572               | 2.186166  | 1.259601  |

|    |    |   |           |           |           | Center | Atomic | Atomic | Coordinates (Angstroms) |           |           |
|----|----|---|-----------|-----------|-----------|--------|--------|--------|-------------------------|-----------|-----------|
|    |    |   |           |           |           | Number | Number | Type   | X                       | Y         | Z         |
| 29 | 1  | 0 | 0.723125  | 1.645653  | 1.848539  |        |        |        |                         |           |           |
| 30 | 1  | 0 | -2.422555 | 4.572545  | 1.574456  |        |        |        |                         |           |           |
| 31 | 1  | 0 | -2.612821 | 4.136158  | -0.863963 |        |        |        |                         |           |           |
| 32 | 1  | 0 | -1.142691 | 2.453624  | -1.943945 | 1      | 6      | 0      | 0.471484                | -2.845173 | -0.137183 |
| 33 | 1  | 0 | -0.582510 | -2.975018 | 0.167111  | 2      | 6      | 0      | 1.048356                | -1.559571 | -0.130058 |
| 34 | 1  | 0 | 0.897093  | -4.953848 | 0.498294  | 3      | 6      | 0      | 2.463334                | -1.425347 | -0.062968 |
| 35 | 1  | 0 | 3.362242  | -4.656930 | 0.370290  | 4      | 6      | 0      | 3.240271                | -2.592117 | 0.009015  |
| 36 | 1  | 0 | 4.352601  | -2.449305 | -0.028686 | 5      | 6      | 0      | 2.650818                | -3.847499 | 0.011048  |
| 37 | 1  | 0 | 0.494523  | 0.851098  | -1.831297 | 6      | 6      | 0      | 1.257626                | -3.981112 | -0.064076 |
| 38 | 1  | 0 | 2.062911  | 3.124573  | -0.999149 | 7      | 6      | 0      | 0.187578                | -0.394017 | -0.159032 |
| 39 | 1  | 0 | 4.509275  | 3.572567  | -0.840766 | 8      | 6      | 0      | 0.796874                | 0.915509  | -0.200762 |
| 40 | 1  | 0 | 8.054028  | 2.294776  | -0.163112 | 9      | 6      | 0      | 2.245715                | 1.079550  | -0.118415 |
| 41 | 1  | 0 | 6.285046  | -2.376227 | 0.638588  | 10     | 6      | 0      | 3.075212                | -0.105322 | -0.067507 |
| 42 | 1  | 0 | 9.565925  | 0.402442  | 0.452754  | 11     | 6      | 0      | 2.800633                | 2.366481  | -0.083112 |
| 43 | 1  | 0 | 8.698012  | -1.852271 | 0.840801  | 12     | 6      | 0      | 4.184900                | 2.585064  | -0.006180 |
| 44 | 15 | 0 | -4.273866 | -0.340411 | 0.045321  | 13     | 6      | 0      | 4.969591                | 1.455118  | 0.021237  |
| 45 | 8  | 0 | -4.959879 | 0.919651  | -0.859893 | 14     | 6      | 0      | 4.436641                | 0.138125  | -0.009229 |
| 46 | 8  | 0 | -4.829111 | 0.041714  | 1.600380  | 15     | 6      | 0      | 6.363512                | 0.907609  | 0.085208  |
| 47 | 8  | 0 | -5.292413 | -1.628461 | -0.365201 | 16     | 6      | 0      | 5.848563                | -0.421392 | 0.052438  |
| 48 | 6  | 0 | -4.924141 | 0.859629  | -2.318310 | 17     | 6      | 0      | 7.703323                | 1.186204  | 0.148772  |
| 49 | 6  | 0 | -4.431555 | 1.313184  | 2.204184  | 18     | 6      | 0      | 8.562751                | 0.059932  | 0.177772  |
| 50 | 6  | 0 | -5.415954 | -2.786072 | 0.519897  | 19     | 6      | 0      | 8.068076                | -1.238066 | 0.142450  |
| 51 | 1  | 0 | -5.504718 | 0.003456  | -2.672385 | 20     | 6      | 0      | 6.678273                | -1.514772 | 0.077546  |
| 52 | 1  | 0 | -5.382202 | 1.788655  | -2.653968 | 21     | 79     | 0      | -1.897741               | -0.497374 | -0.071787 |
| 53 | 1  | 0 | -3.889403 | 0.802892  | -2.681313 | 22     | 1      | 0      | -2.122789               | 3.628271  | 2.196226  |
| 54 | 1  | 0 | -4.896915 | 2.140289  | 1.661425  | 23     | 6      | 0      | -0.098958               | 2.107306  | -0.081636 |
| 55 | 1  | 0 | -4.801594 | 1.270153  | 3.227286  | 24     | 6      | 0      | -0.277145               | 2.987223  | -1.155623 |
| 56 | 1  | 0 | -3.338334 | 1.424883  | 2.204096  | 25     | 6      | 0      | -1.125498               | 4.087393  | -1.026085 |
| 57 | 1  | 0 | -5.861423 | -2.480821 | 1.469450  | 26     | 6      | 0      | -1.789908               | 4.318353  | 0.179930  |
| 58 | 1  | 0 | -6.073713 | -3.474964 | -0.007320 | 27     | 6      | 0      | -1.611440               | 3.446067  | 1.255973  |
| 59 | 1  | 0 | -4.438793 | -3.256321 | 0.684803  | 28     | 6      | 0      | -0.771062               | 2.340386  | 1.126984  |
|    |    |   |           |           |           | 29     | 1      | 0      | -0.620991               | 1.661848  | 1.964344  |
|    |    |   |           |           |           | 30     | 1      | 0      | -2.441471               | 5.180915  | 0.283576  |
|    |    |   |           |           |           | 31     | 1      | 0      | -1.261471               | 4.765710  | -1.862699 |
|    |    |   |           |           |           | 32     | 1      | 0      | 0.252766                | 2.811178  | -2.090509 |

TS3' (NIMGA = 1, 938.85i cm<sup>-1</sup>)

|                          |        |        |                         |           |           |    |    |   |           |           |           |           |
|--------------------------|--------|--------|-------------------------|-----------|-----------|----|----|---|-----------|-----------|-----------|-----------|
| 33                       | 1      | 0      | -0.612366               | -2.927214 | -0.196484 | 2  | 6  | 0 | -0.356689 | 0.337213  | 2.389595  |           |
| 34                       | 1      | 0      | 0.802285                | -4.965681 | -0.065749 | 3  | 6  | 0 | -1.646813 | 0.159976  | 1.832453  |           |
| 35                       | 1      | 0      | 3.275360                | -4.733469 | 0.070382  | 4  | 6  | 0 | -2.597608 | -0.574976 | 2.562387  |           |
| 36                       | 1      | 0      | 4.318191                | -2.506998 | 0.070354  | 5  | 6  | 0 | -2.275361 | -1.138730 | 3.786969  |           |
| 37                       | 1      | 0      | 0.428636                | 0.337518  | -1.307128 | 6  | 6  | 0 | -0.987938 | -0.980466 | 4.322541  |           |
| 38                       | 1      | 0      | 2.134498                | 3.223207  | -0.104288 | 7  | 6  | 0 | 0.625624  | 1.163961  | 1.690426  |           |
| 39                       | 1      | 0      | 4.587085                | 3.590998  | 0.029324  | 8  | 6  | 0 | 0.262727  | 1.916171  | 0.546089  |           |
| 40                       | 1      | 0      | 8.105744                | 2.193165  | 0.175054  | 9  | 6  | 0 | -0.998572 | 1.645667  | -0.105272 |           |
| 41                       | 1      | 0      | 6.339368                | -2.545926 | 0.048462  | 10 | 6  | 0 | -1.945681 | 0.745517  | 0.535683  |           |
| 42                       | 1      | 0      | 9.635984                | 0.215932  | 0.227592  | 11 | 6  | 0 | -1.268824 | 2.197644  | -1.375673 |           |
| 43                       | 1      | 0      | 8.765739                | -2.069820 | 0.164391  | 12 | 6  | 0 | -2.452018 | 1.940671  | -2.078562 |           |
| 44                       | 15     | 0      | -4.286394               | -0.480075 | 0.059647  | 13 | 6  | 0 | -3.346696 | 1.095040  | -1.456473 |           |
| 45                       | 8      | 0      | -4.930988               | 1.043025  | 0.435209  | 14 | 6  | 0 | -3.098155 | 0.502919  | -0.189361 |           |
| 46                       | 8      | 0      | -5.052617               | -1.461664 | 1.206100  | 15 | 6  | 0 | -4.655154 | 0.370962  | -1.557376 |           |
| 47                       | 8      | 0      | -5.157659               | -0.868173 | -1.340297 | 16 | 6  | 0 | -4.414962 | -0.246628 | -0.294237 |           |
| 48                       | 6      | 0      | -4.765366               | 2.135267  | -0.522603 | 17 | 6  | 0 | -5.779494 | 0.127220  | -2.302411 |           |
| 49                       | 6      | 0      | -4.950578               | -1.148606 | 2.630791  | 18 | 6  | 0 | -6.700745 | -0.791162 | -1.739782 |           |
| 50                       | 6      | 0      | -5.235772               | -2.256558 | -1.793171 | 19 | 6  | 0 | -6.466208 | -1.404654 | -0.515046 |           |
| 51                       | 1      | 0      | -5.370220               | 1.939629  | -1.411694 | 20 | 6  | 0 | -5.298513 | -1.145303 | 0.248597  |           |
| 52                       | 1      | 0      | -5.122336               | 3.025475  | -0.006368 | 21 | 79 | 0 | 1.499144  | -0.400270 | 0.360675  |           |
| 53                       | 1      | 0      | -3.707652               | 2.265180  | -0.792302 | 22 | 1  | 0 | 4.429377  | 3.770515  | -0.453691 |           |
| 54                       | 1      | 0      | -5.456530               | -0.203051 | 2.839182  | 23 | 6  | 0 | 1.149477  | 3.017919  | 0.110067  |           |
| 55                       | 1      | 0      | -5.453256               | -1.970520 | 3.137746  | 24 | 6  | 0 | 0.608967  | 4.302875  | -0.078867 |           |
| 56                       | 1      | 0      | -3.900687               | -1.103807 | 2.945664  | 25 | 6  | 0 | 1.436222  | 5.378838  | -0.391148 |           |
| 57                       | 1      | 0      | -5.780376               | -2.855692 | -1.059553 | 26 | 6  | 0 | 2.811561  | 5.192419  | -0.528377 |           |
| 58                       | 1      | 0      | -5.781841               | -2.217181 | -2.734120 | 27 | 6  | 0 | 3.360230  | 3.922762  | -0.342725 |           |
| 59                       | 1      | 0      | -4.232914               | -2.667732 | -1.962181 | 28 | 6  | 0 | 2.537813  | 2.847235  | -0.020436 |           |
| -----                    |        |        |                         |           |           |    | 29 | 1 | 0         | 2.973791  | 1.855562  | 0.108711  |
| -----                    |        |        |                         |           |           |    | 30 | 1 | 0         | 3.453112  | 6.031259  | -0.778905 |
| <b>Int4' (NIMGA = 0)</b> |        |        |                         |           |           |    | 31 | 1 | 0         | 1.004526  | 6.366199  | -0.521439 |
| -----                    |        |        |                         |           |           |    | 32 | 1 | 0         | -0.458062 | 4.461722  | 0.052999  |
| Center                   | Atomic | Atomic | Coordinates (Angstroms) |           |           | 33 | 1  | 0 | 0.955848  | -0.097707 | 4.044243  |           |
| Number                   | Number | Type   | X                       | Y         | Z         | 34 | 1  | 0 | -0.742151 | -1.418099 | 5.284822  |           |
| -----                    |        |        |                         |           |           |    | 35 | 1 | 0         | -3.025366 | -1.695625 | 4.339548  |
| -----                    |        |        |                         |           |           |    | 36 | 1 | 0         | -3.604642 | -0.673578 | 2.172052  |
| 1                        | 6      | 0      | -0.039302               | -0.246791 | 3.629769  |    |    |   |           |           |           |           |

|    |    |   |           |           |           |
|----|----|---|-----------|-----------|-----------|
| 37 | 1  | 0 | 1.467905  | 1.527633  | 2.282179  |
| 38 | 1  | 0 | -0.513924 | 2.829398  | -1.833894 |
| 39 | 1  | 0 | -2.624703 | 2.377035  | -3.055748 |
| 40 | 1  | 0 | -5.975877 | 0.592844  | -3.262322 |
| 41 | 1  | 0 | -5.149495 | -1.653632 | 1.196201  |
| 42 | 1  | 0 | -7.612754 | -1.022525 | -2.281369 |
| 43 | 1  | 0 | -7.199179 | -2.105499 | -0.126841 |
| 44 | 15 | 0 | 2.211482  | -2.198386 | -1.018679 |
| 45 | 8  | 0 | 3.175290  | -3.419616 | -0.366106 |
| 46 | 8  | 0 | 3.083854  | -1.779281 | -2.403416 |
| 47 | 8  | 0 | 0.921334  | -3.077419 | -1.671044 |
| 48 | 6  | 0 | 2.623152  | -4.357382 | 0.614781  |
| 49 | 6  | 0 | 4.468265  | -1.317053 | -2.290106 |
| 50 | 6  | 0 | -0.102126 | -2.375957 | -2.445460 |
| 51 | 1  | 0 | 1.857750  | -4.976404 | 0.141524  |
| 52 | 1  | 0 | 3.470139  | -4.965601 | 0.926911  |
| 53 | 1  | 0 | 2.211009  | -3.819305 | 1.476977  |
| 54 | 1  | 0 | 5.096341  | -2.120115 | -1.897319 |
| 55 | 1  | 0 | 4.763381  | -1.063959 | -3.306794 |
| 56 | 1  | 0 | 4.529085  | -0.426681 | -1.651515 |
| 57 | 1  | 0 | 0.331824  | -1.996326 | -3.374293 |
| 58 | 1  | 0 | -0.860079 | -3.127456 | -2.659261 |
| 59 | 1  | 0 | -0.545397 | -1.557467 | -1.859689 |

.....



8)  $^1\text{H}$  NMR,  $^{13}\text{C}$  NMR and  $^{19}\text{F}$  NMR spectra for new compounds

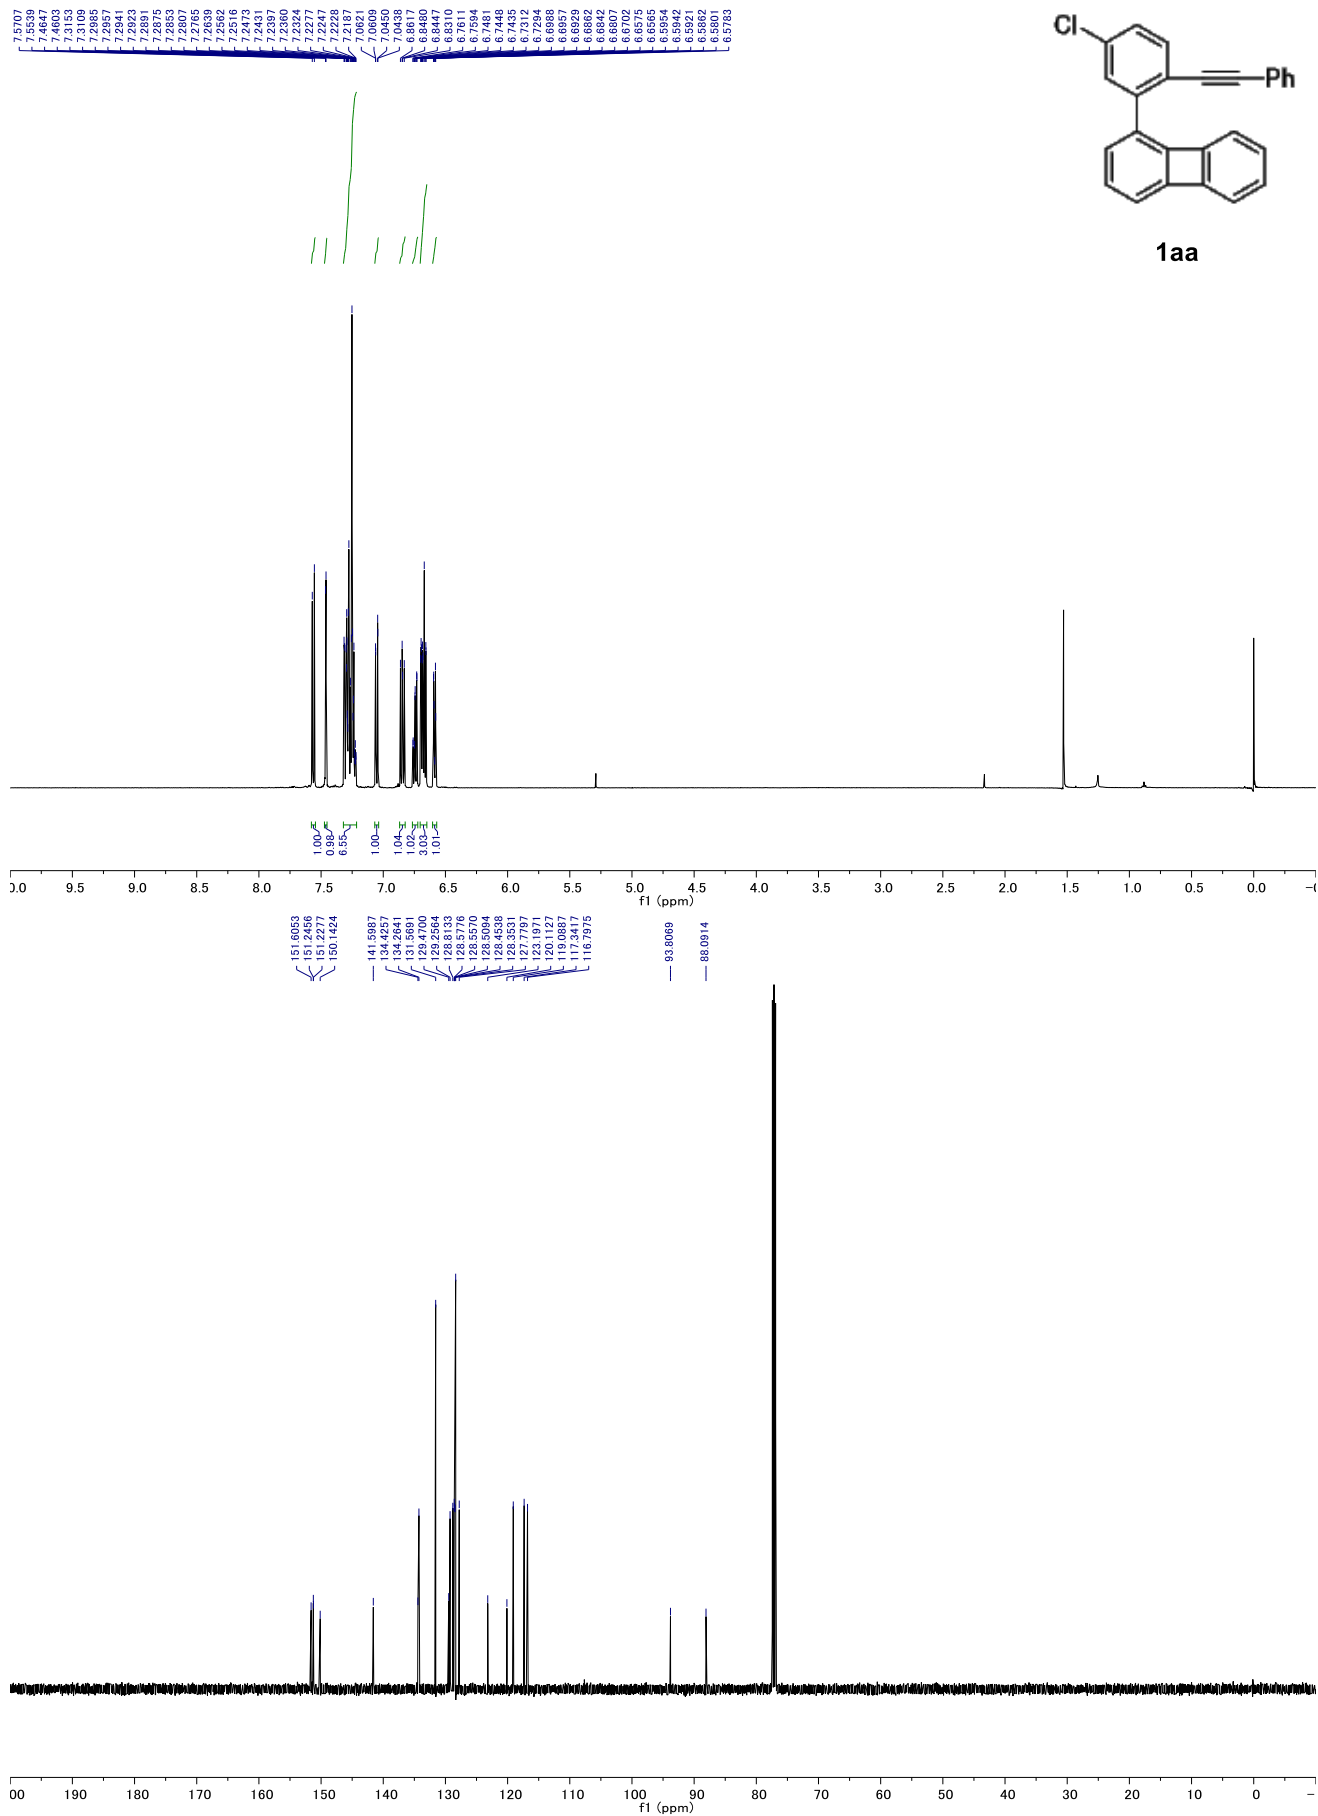

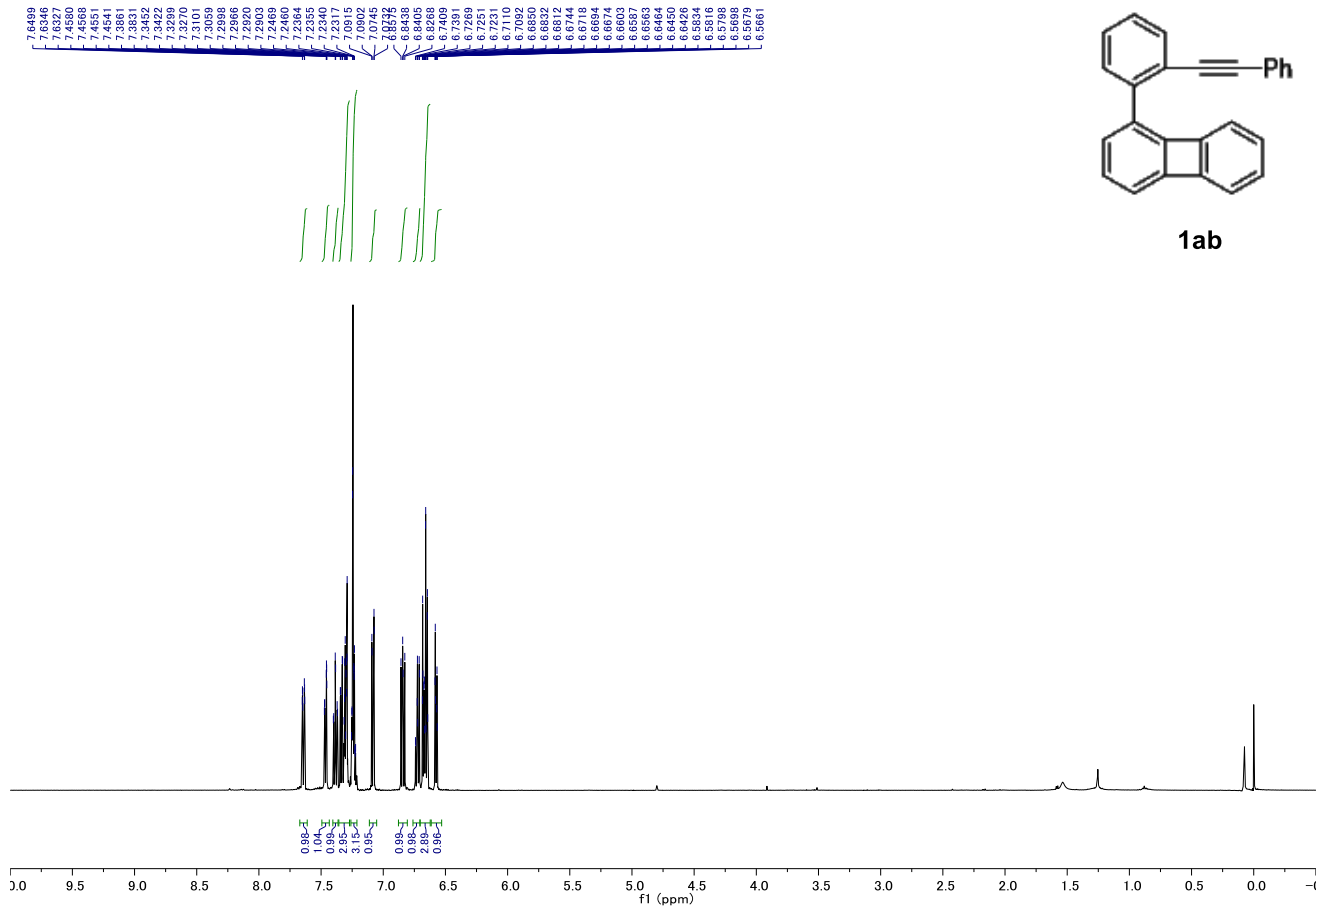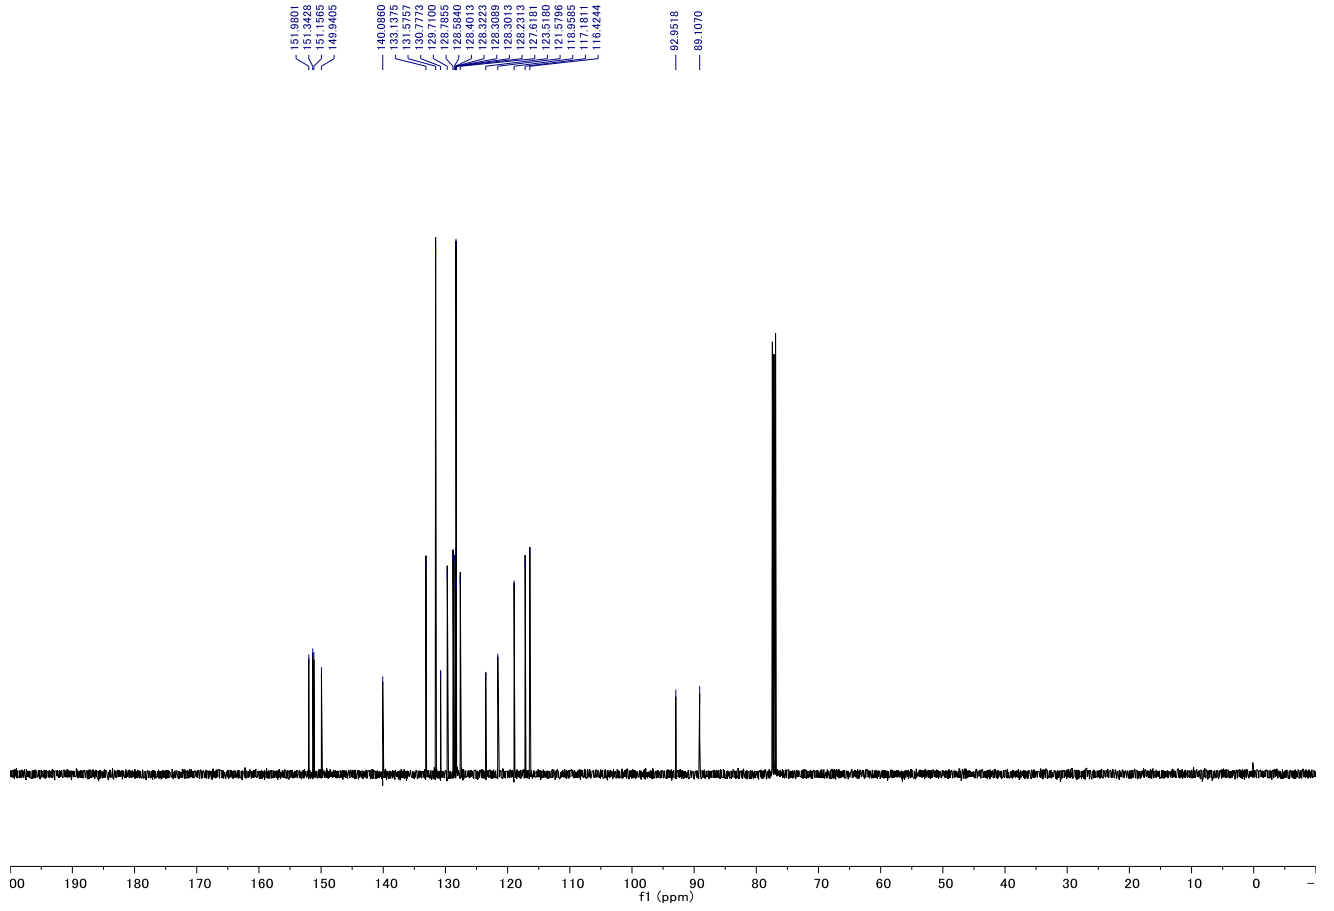



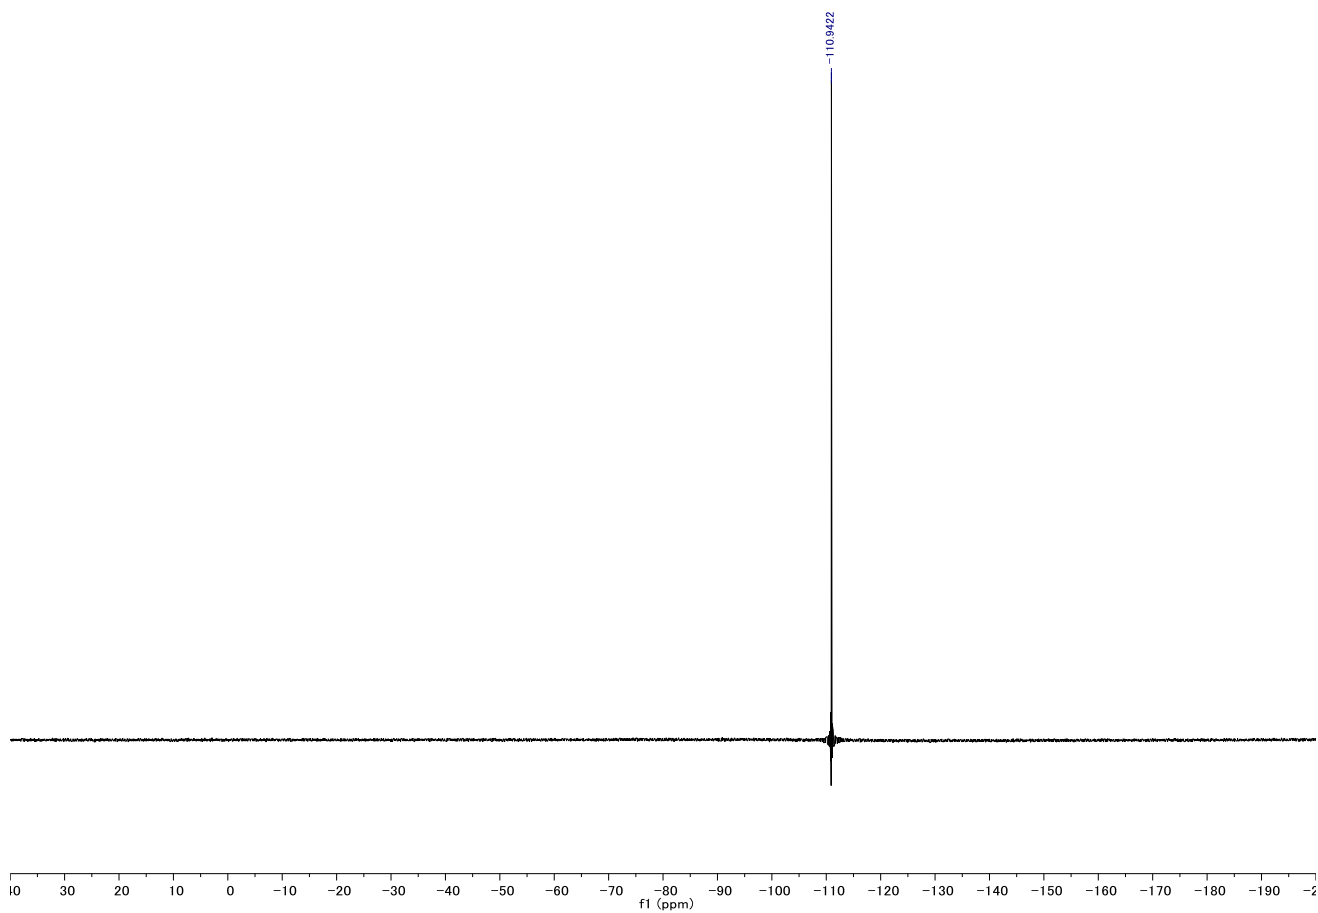



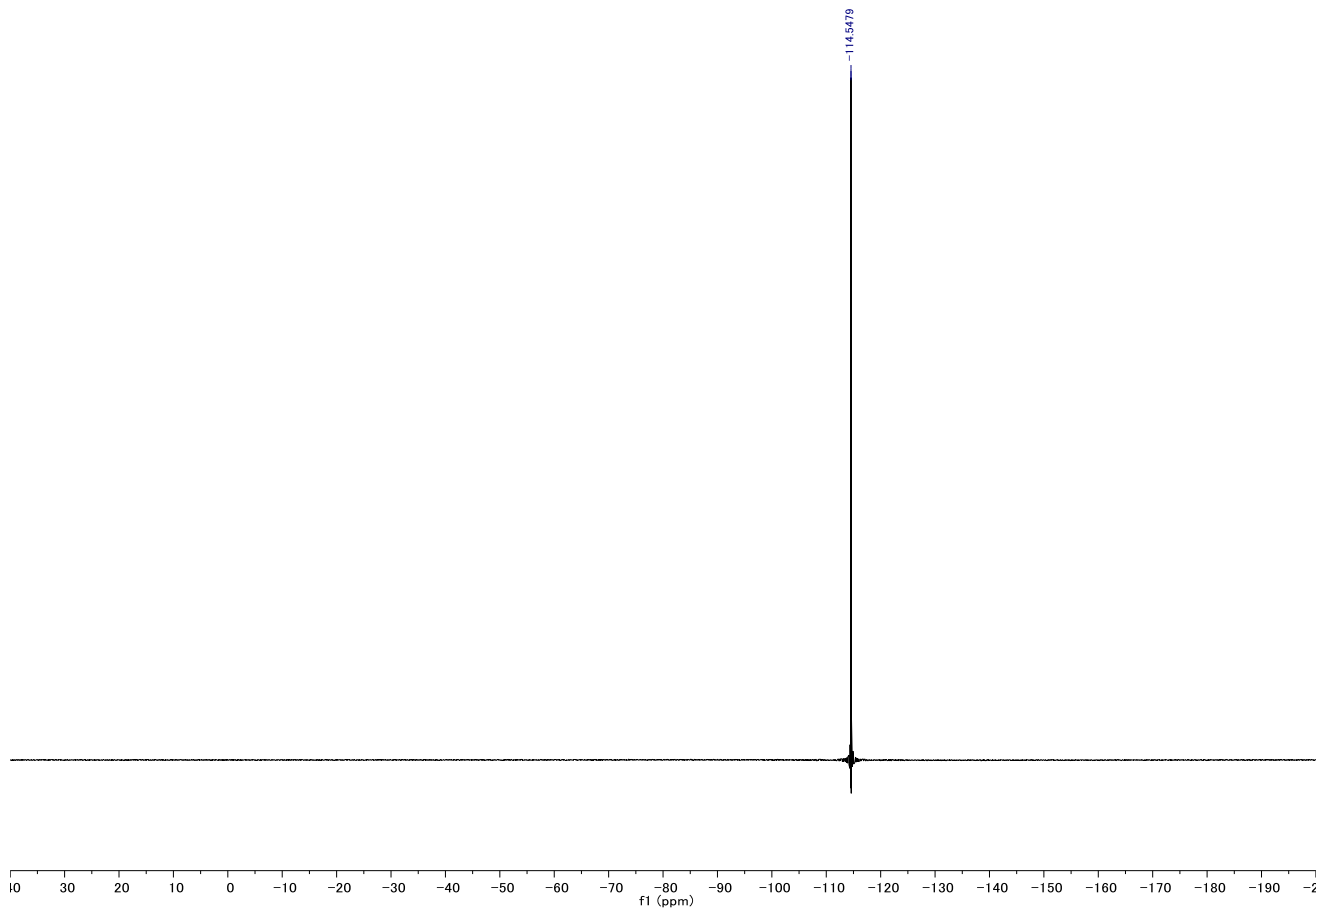

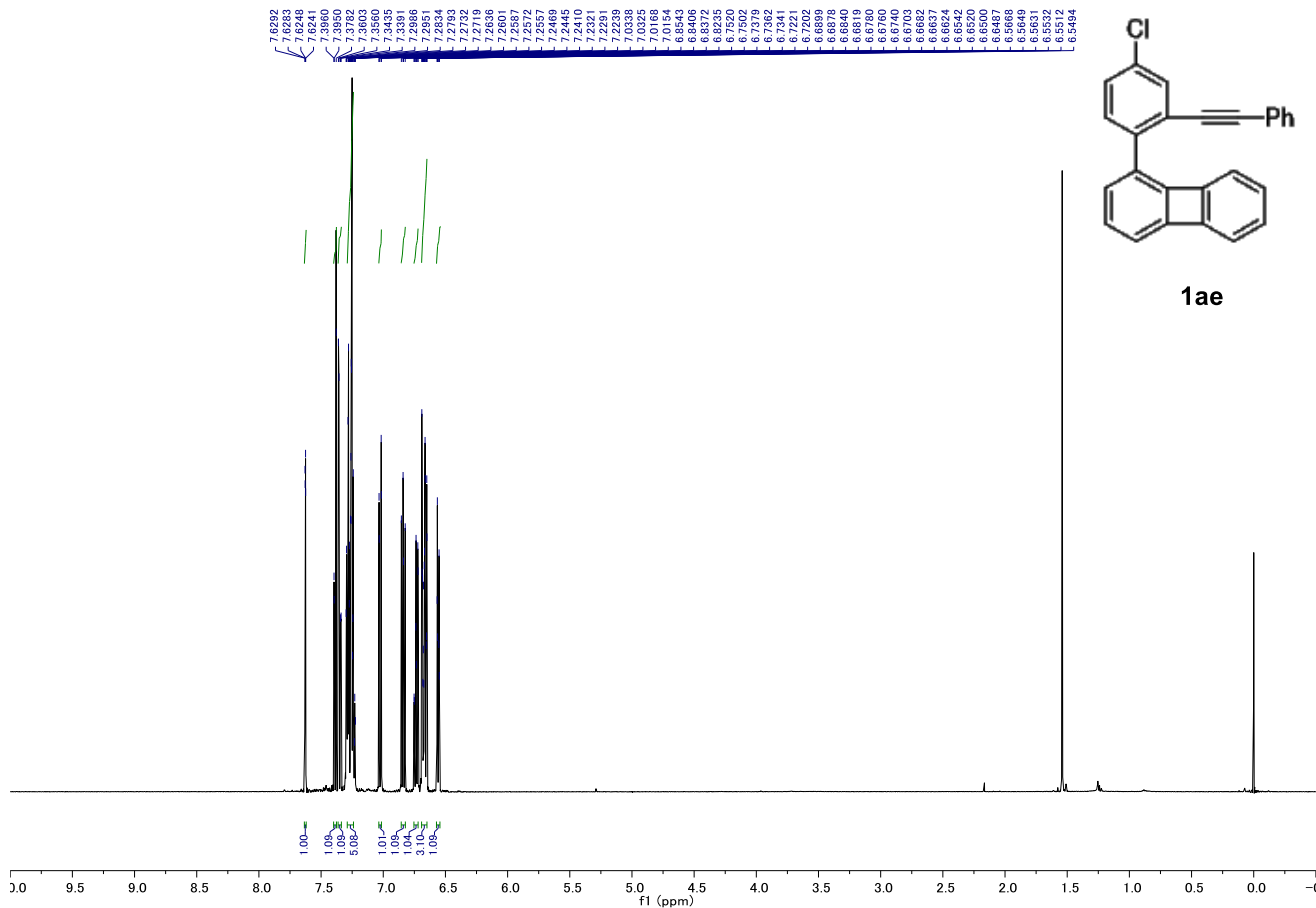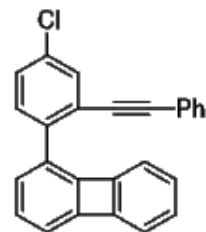

**1ae**

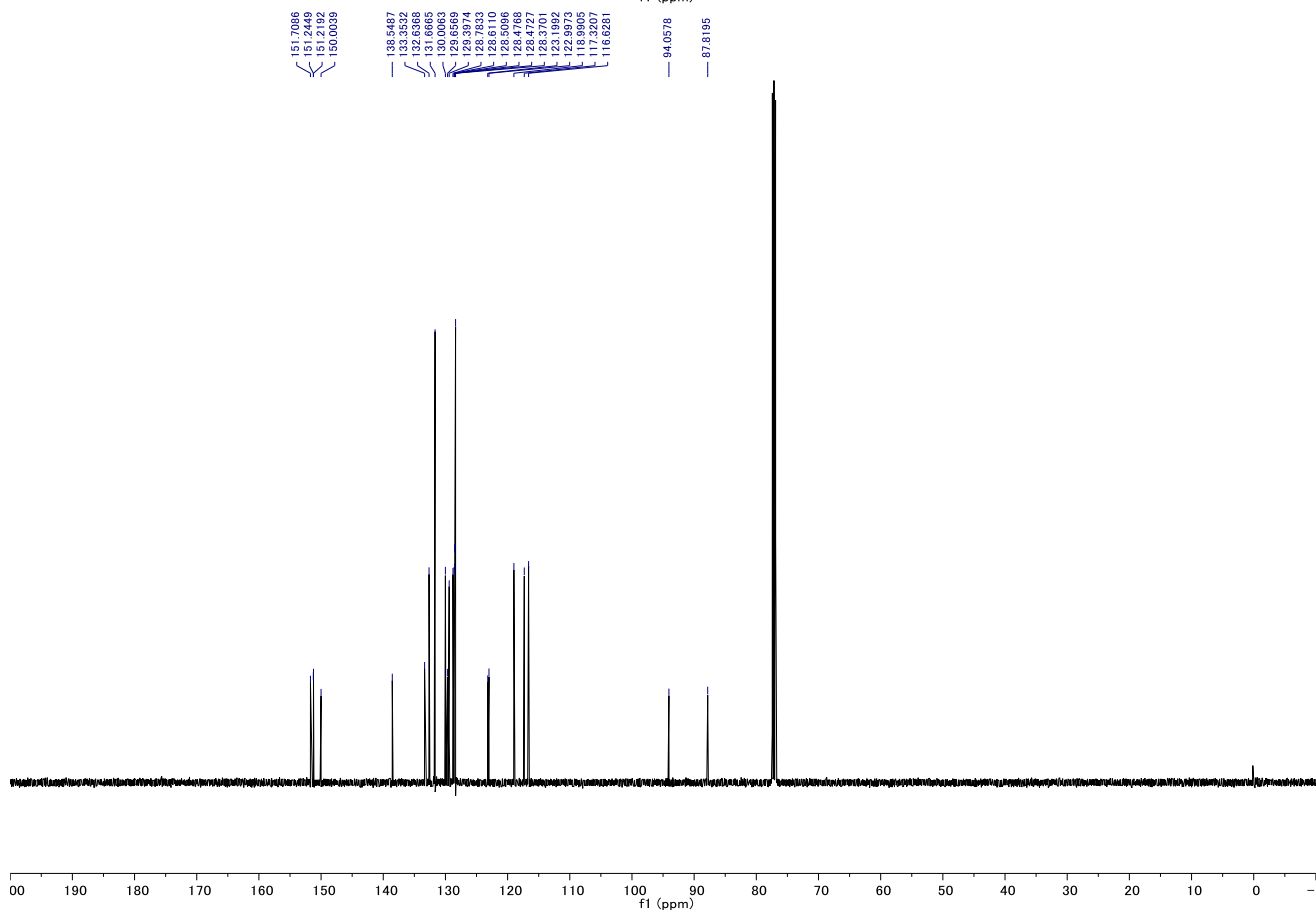

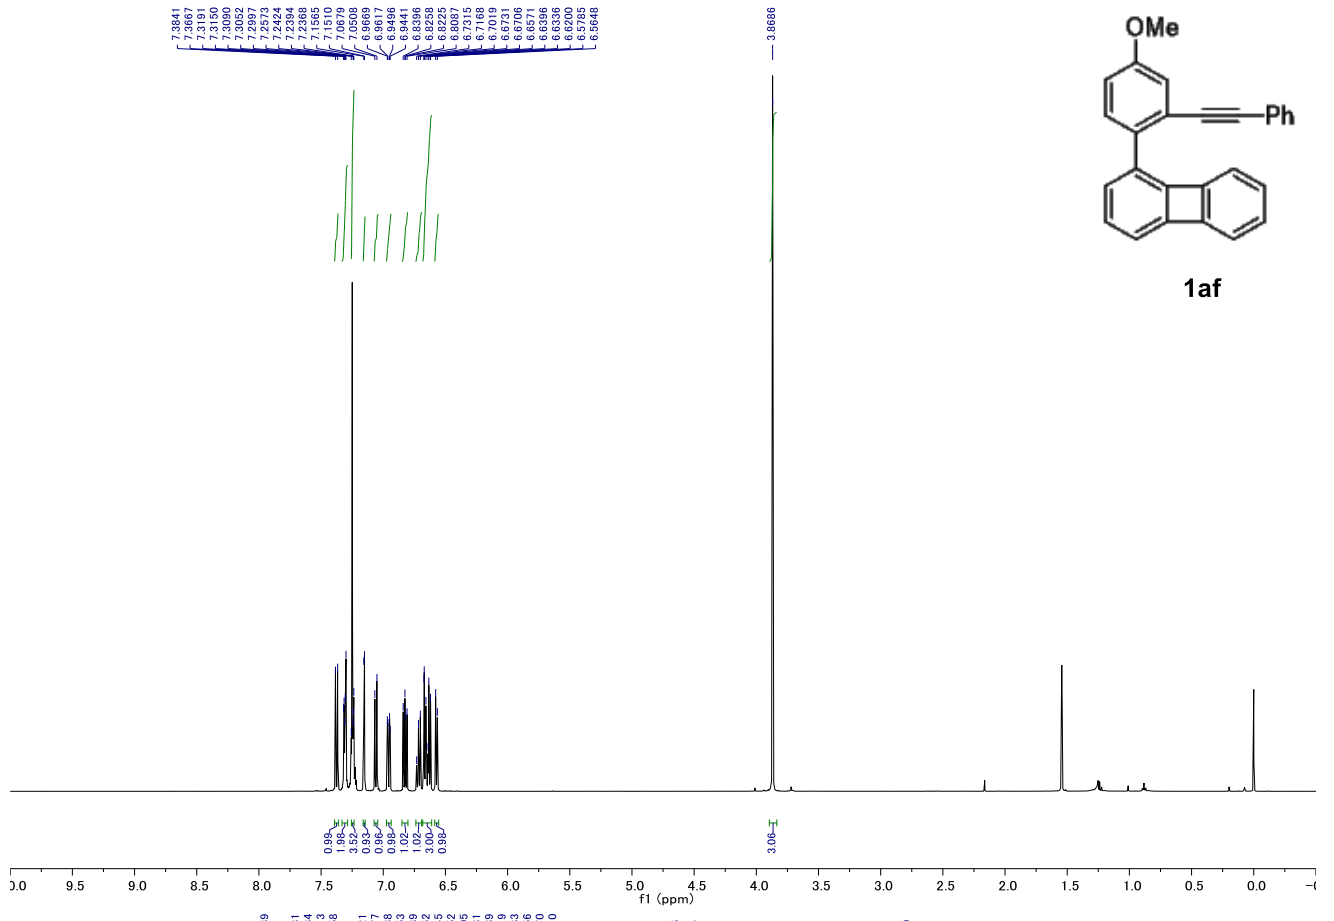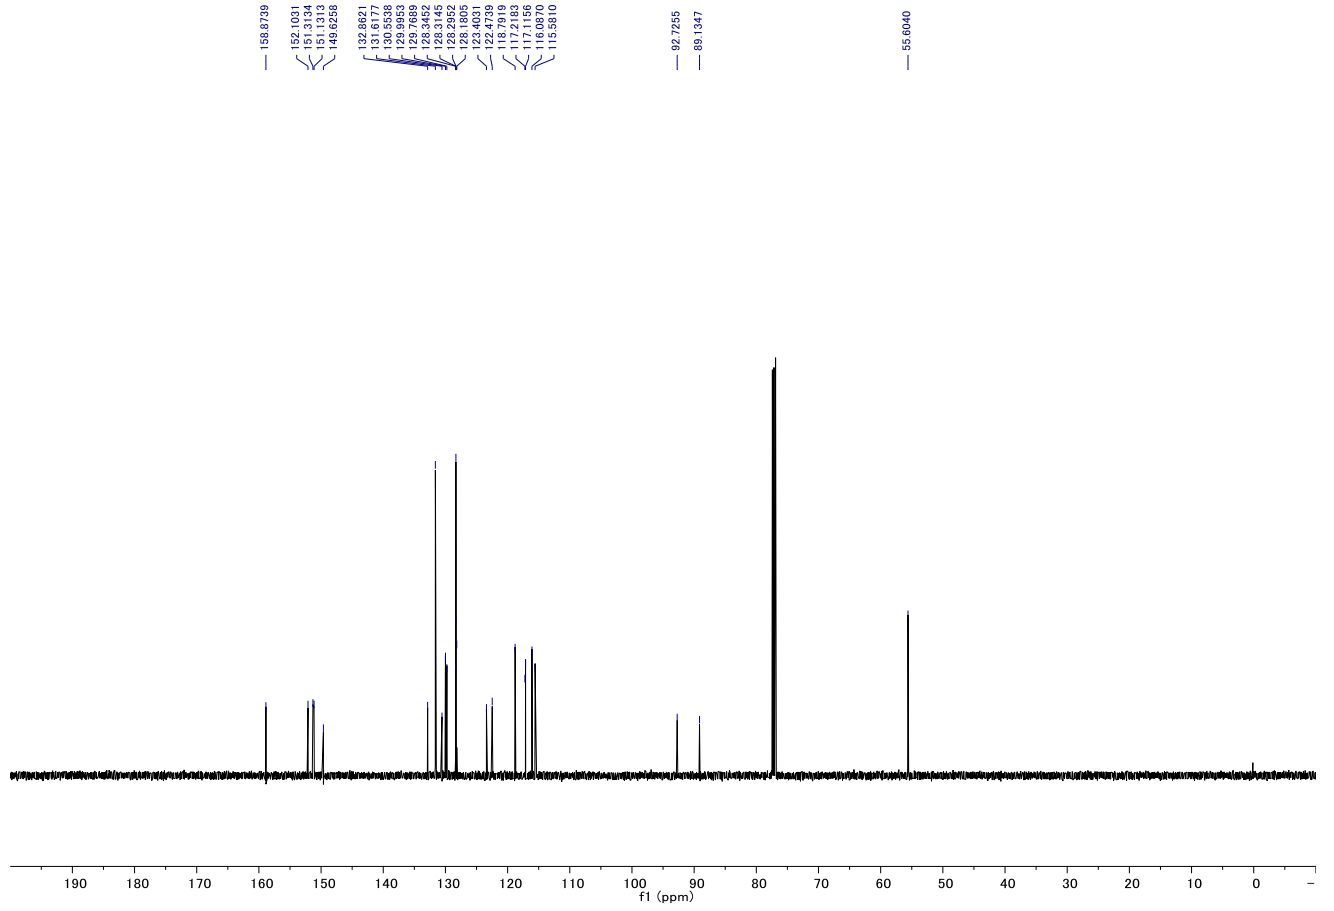



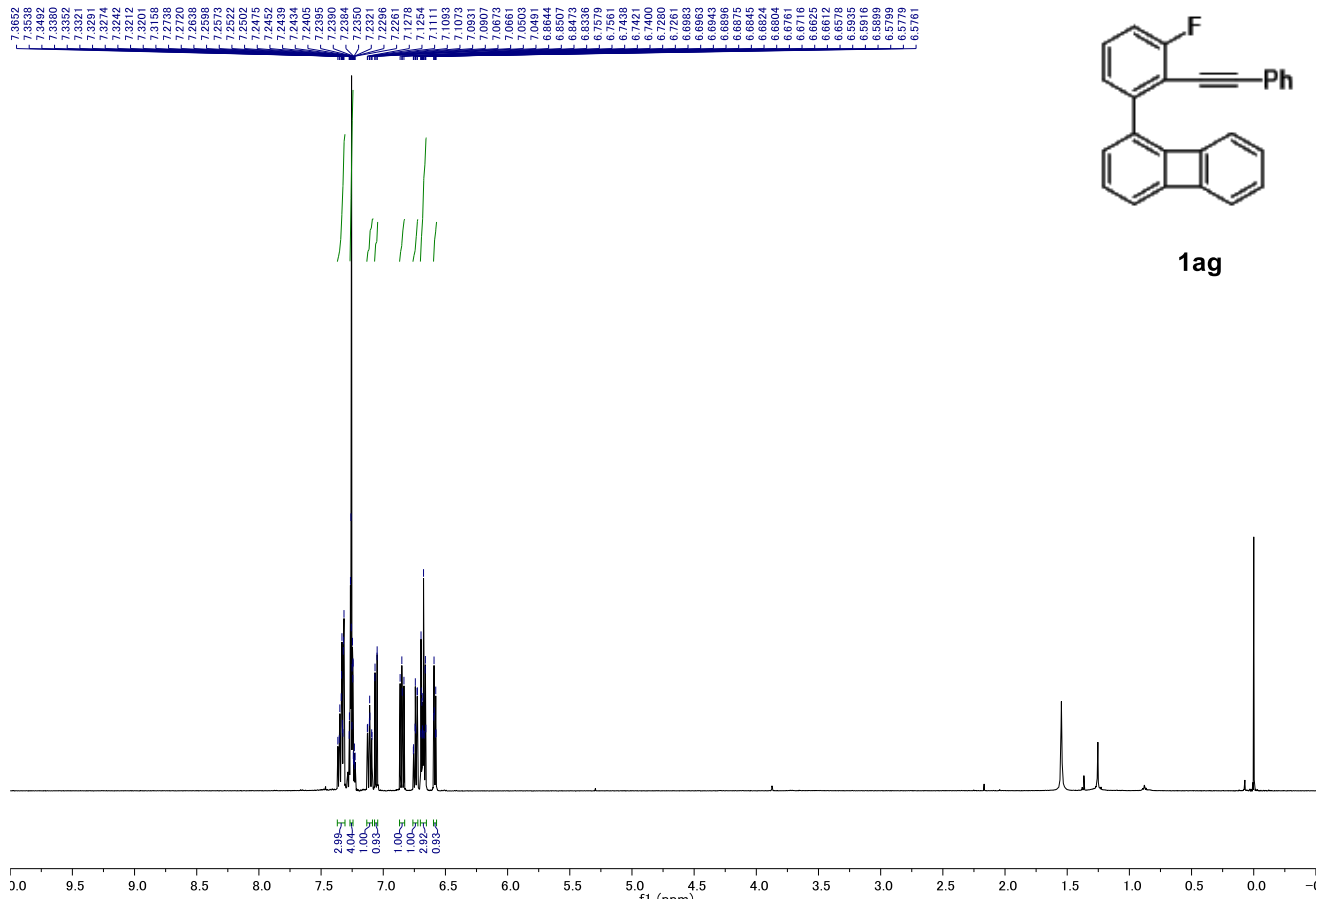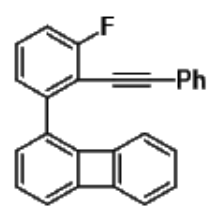

1ag

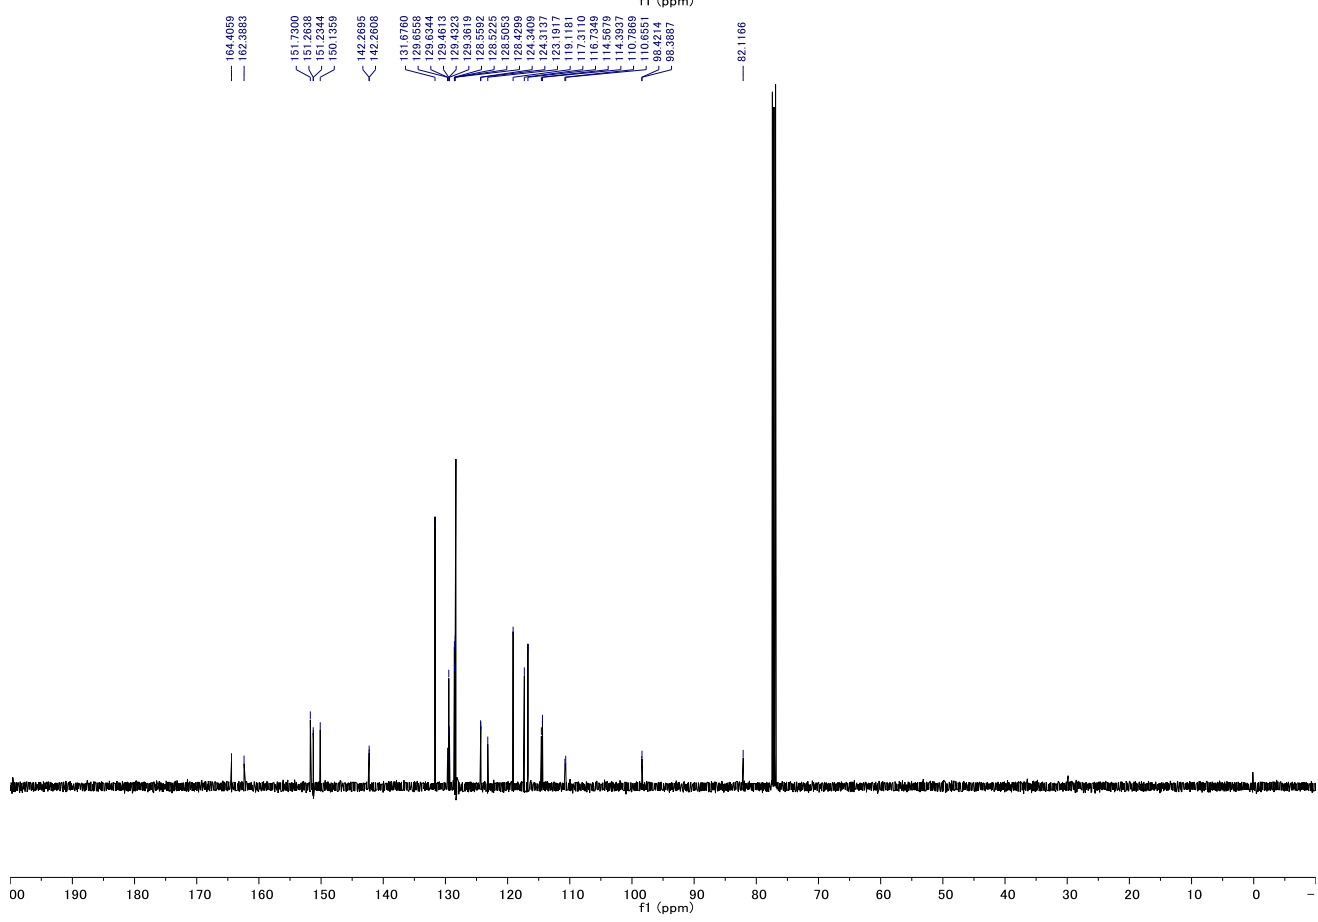

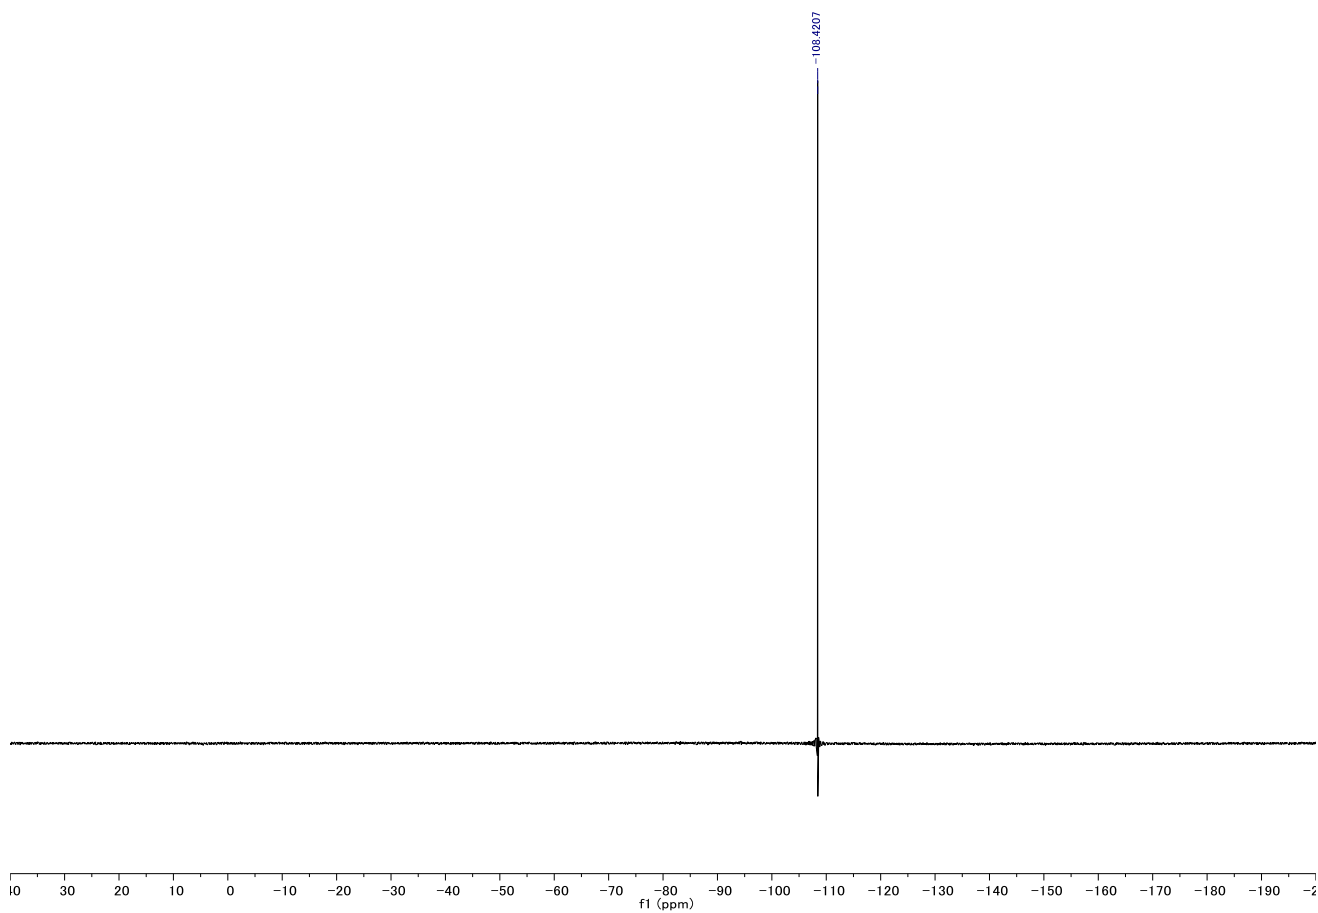

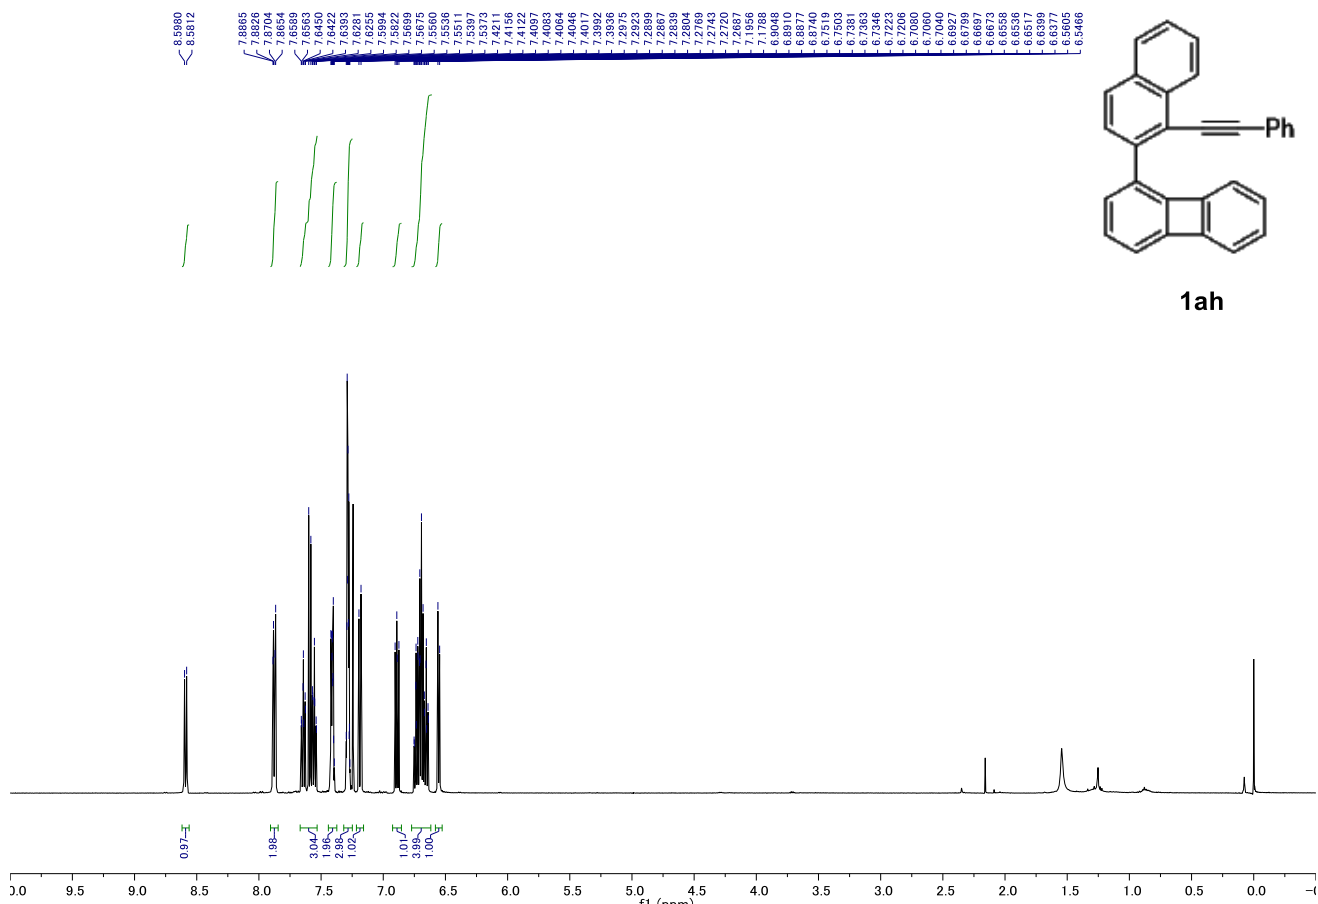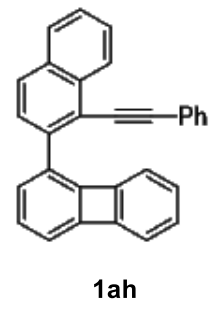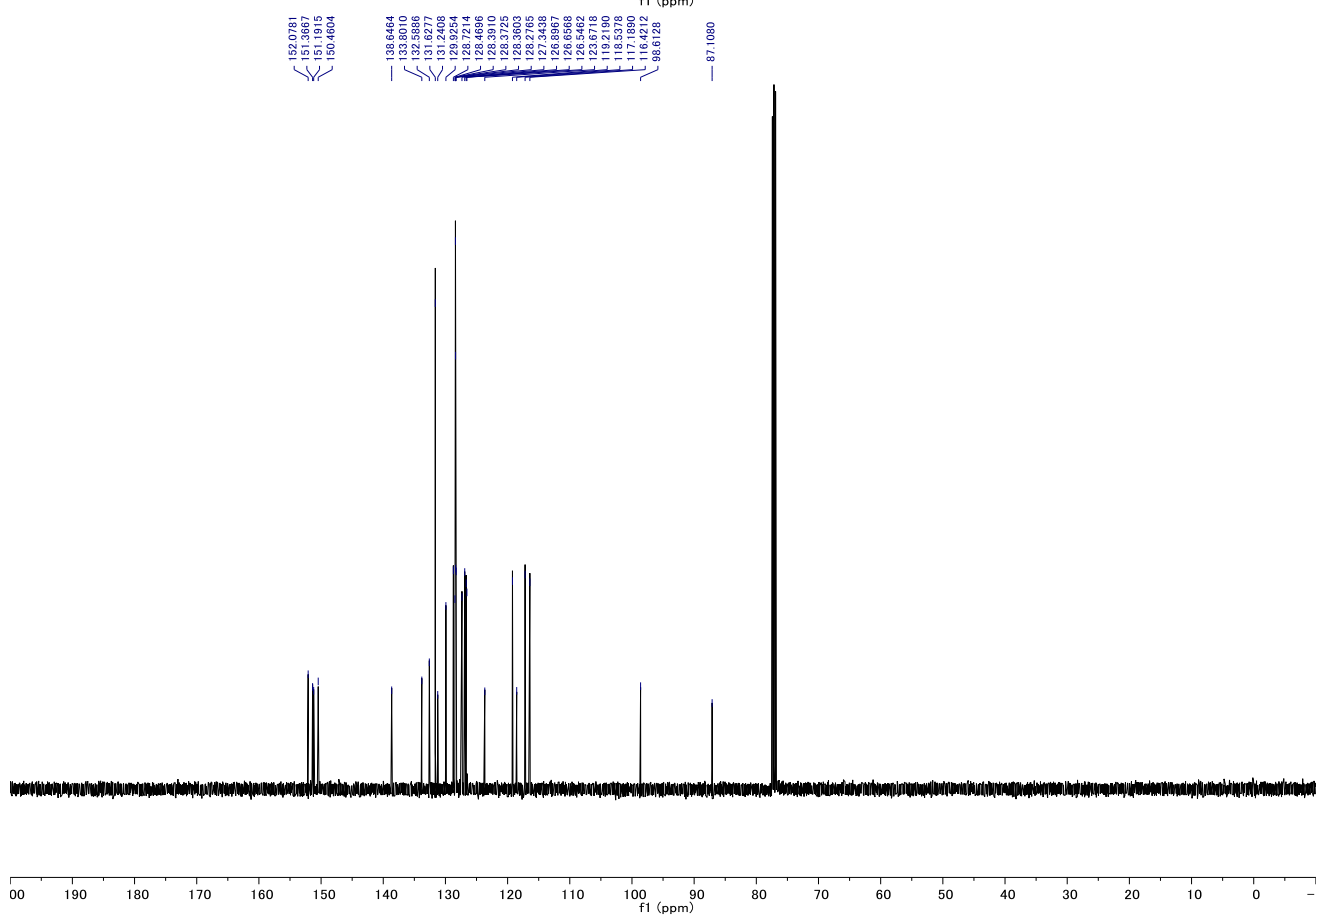

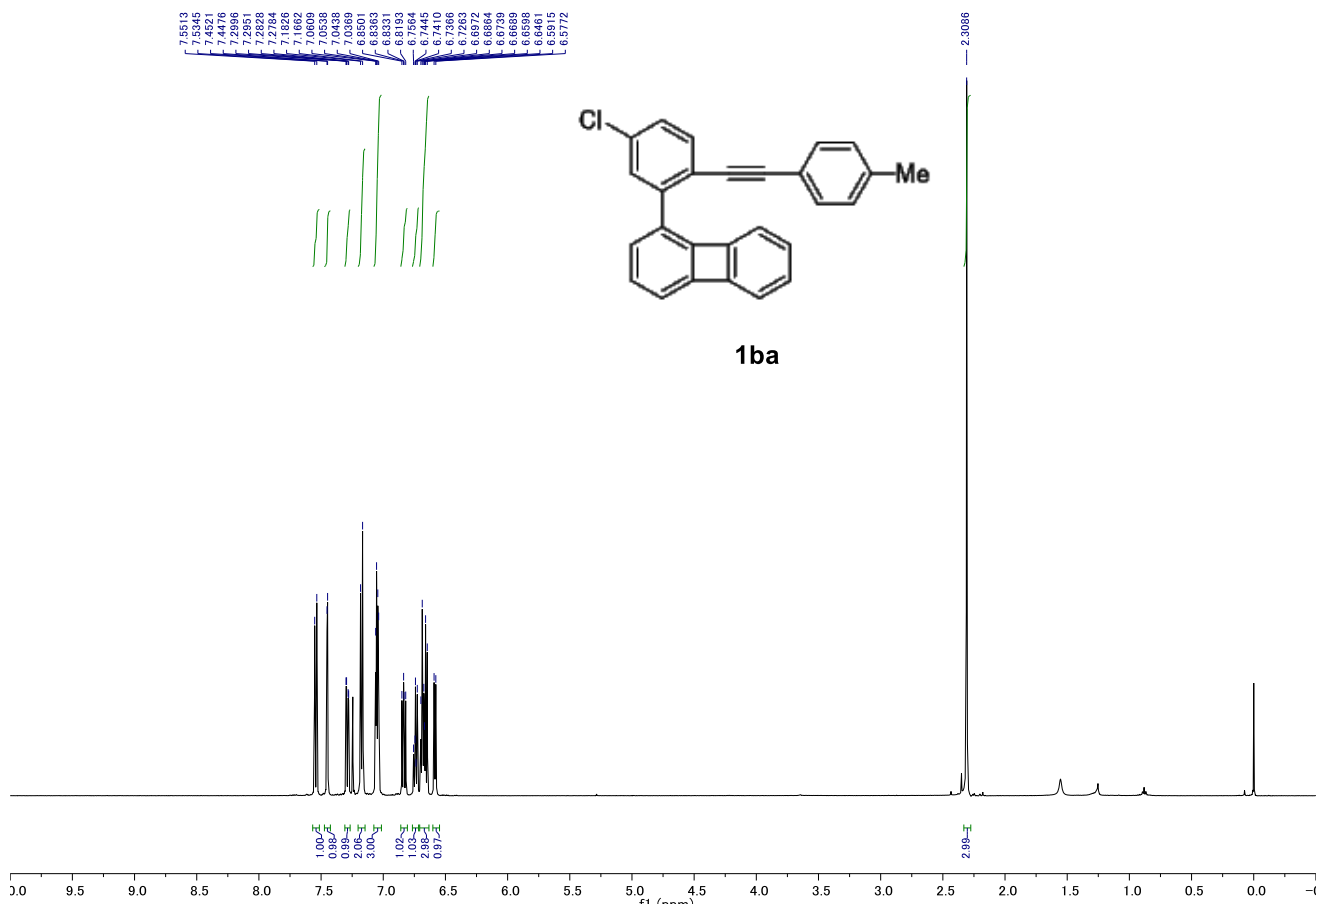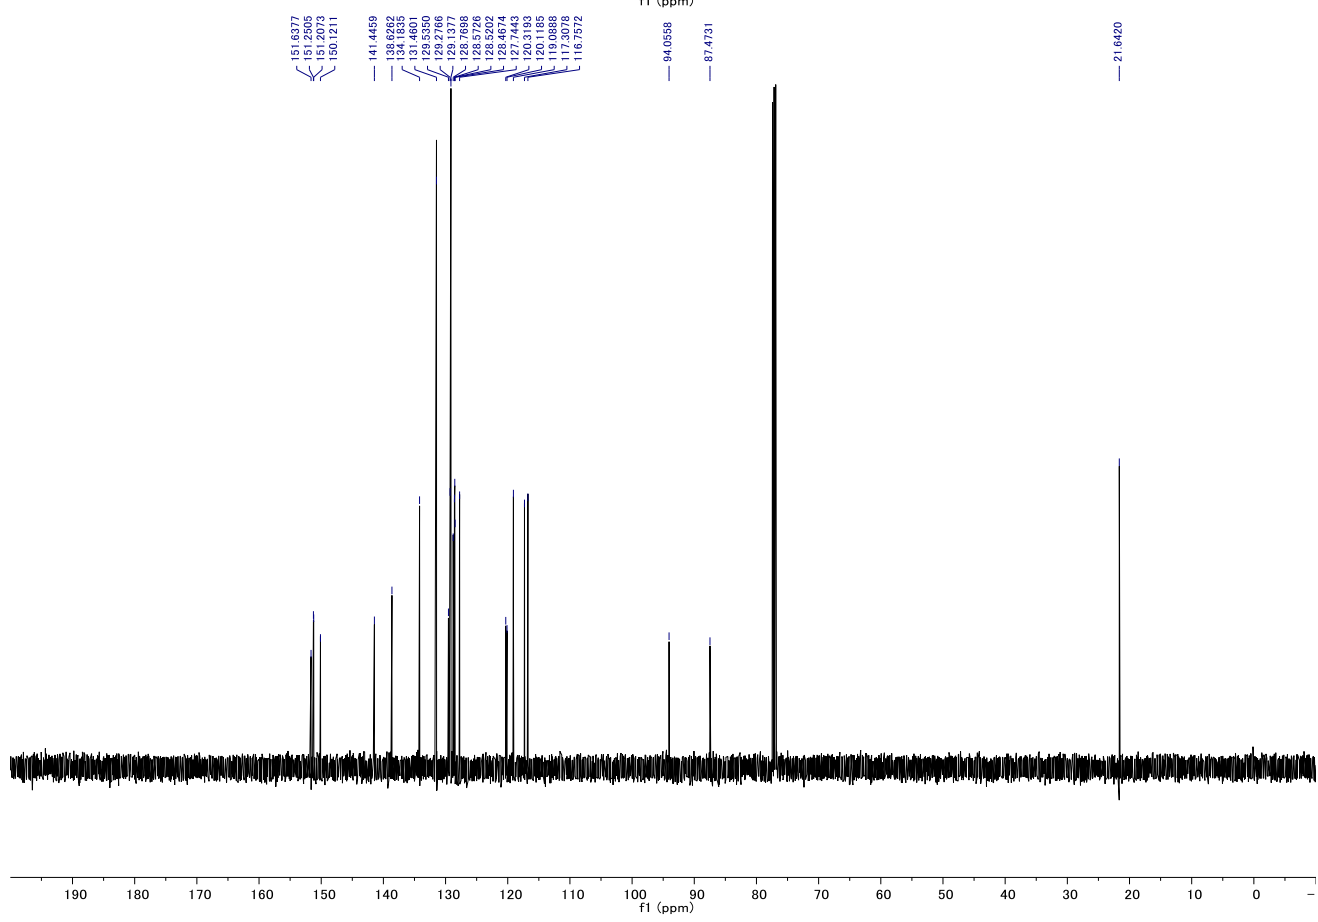

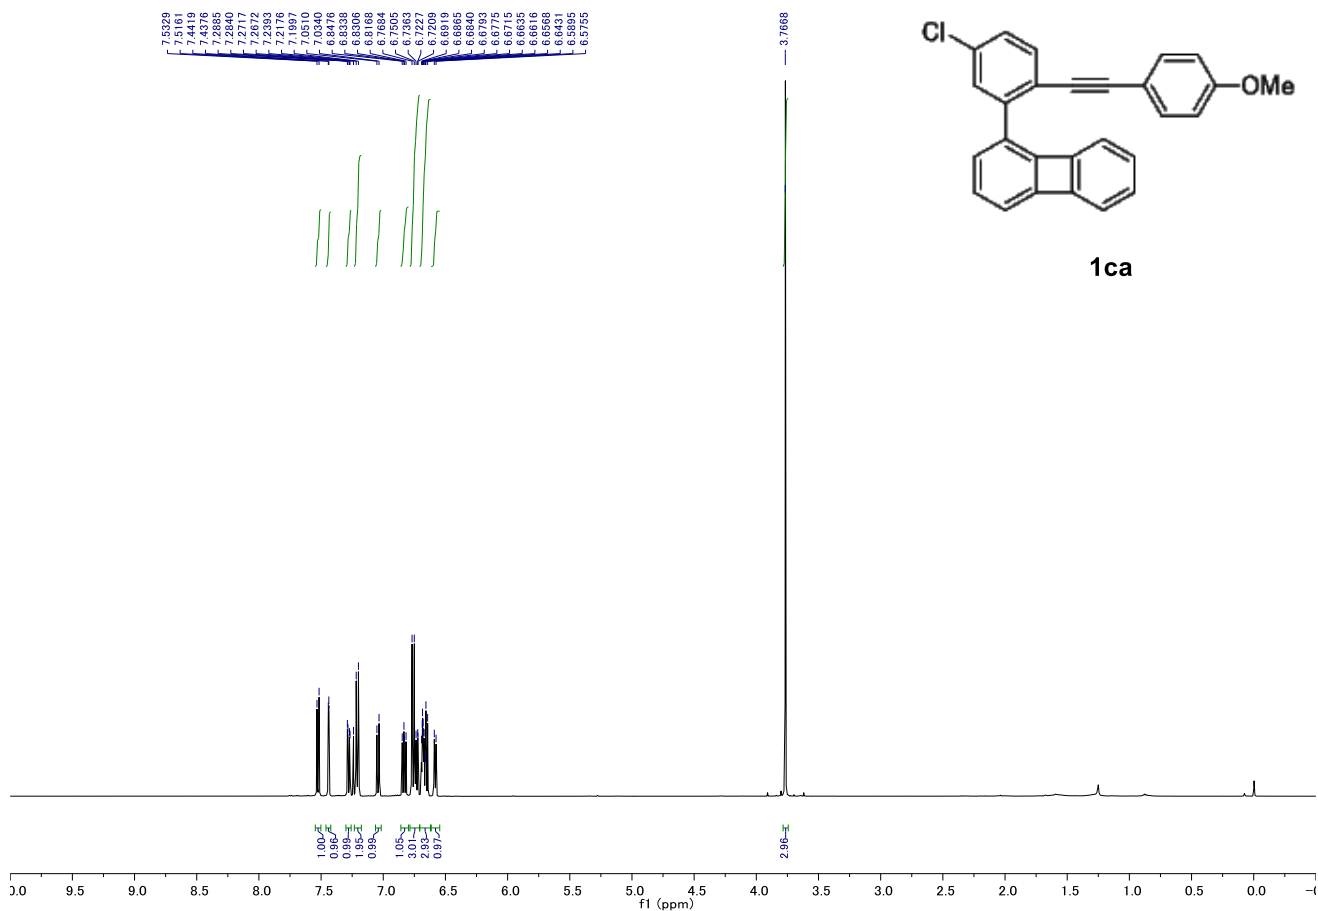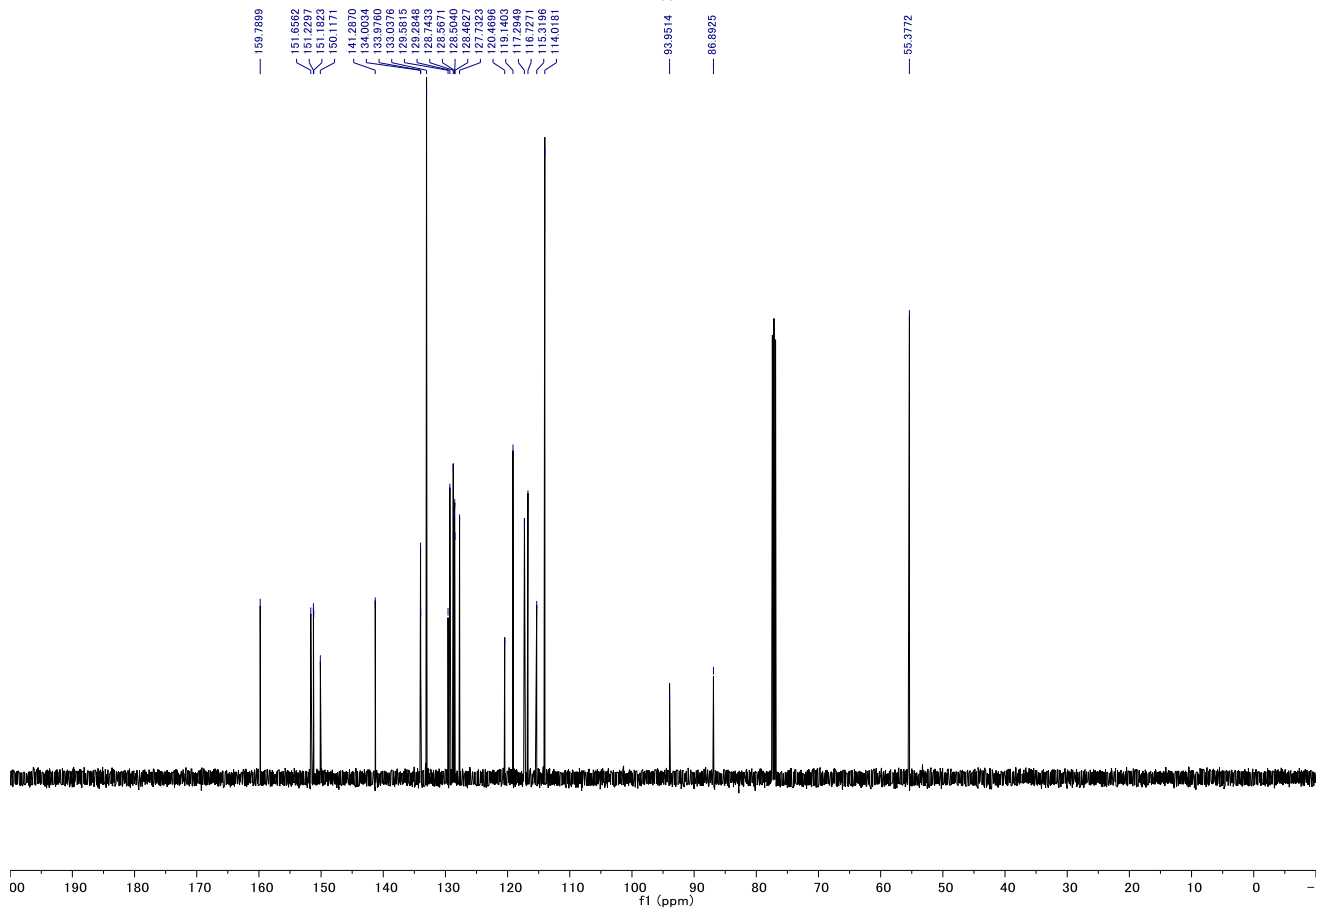

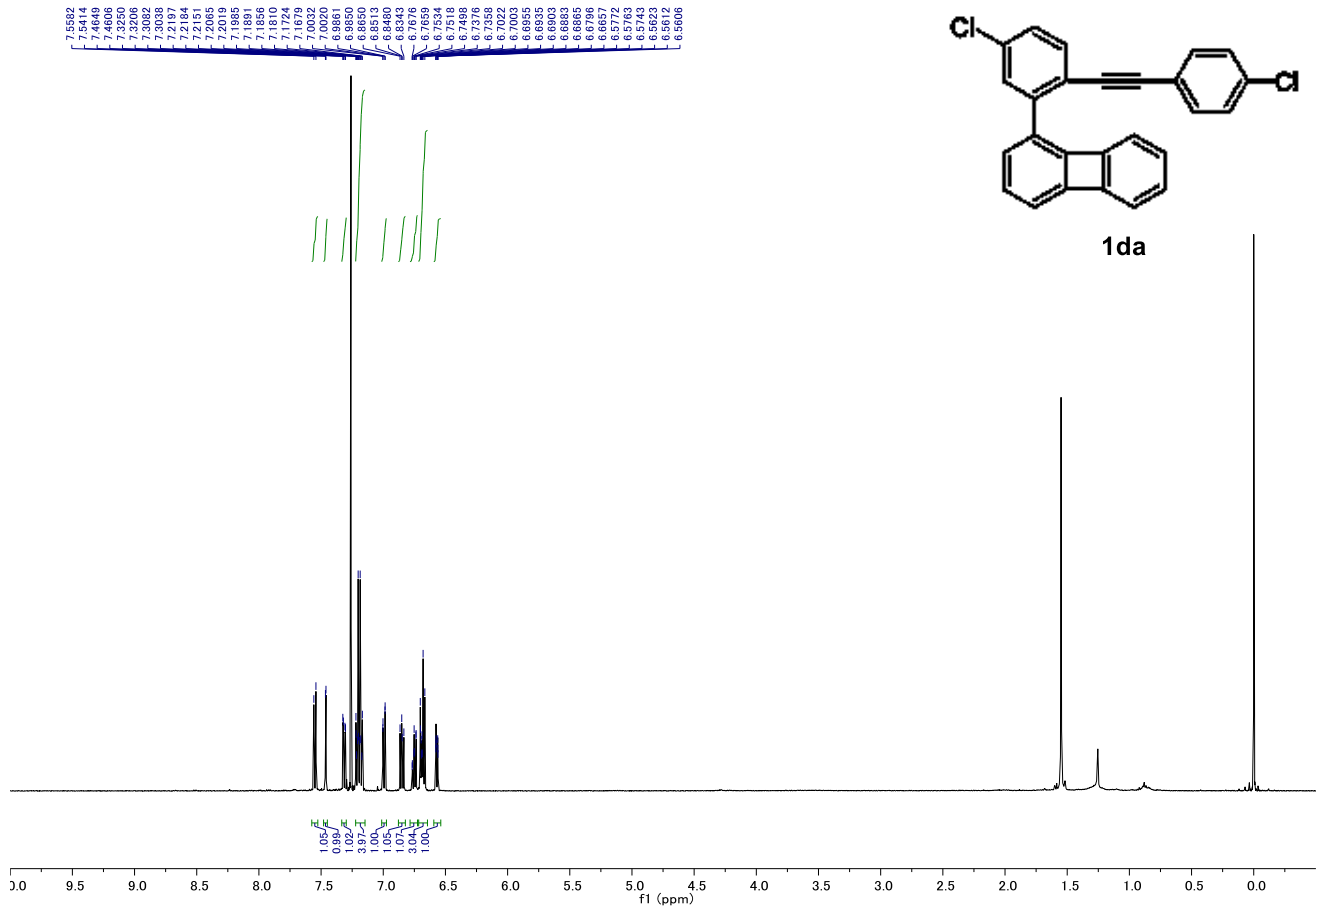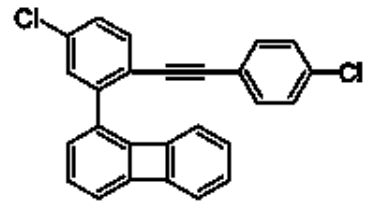

1da

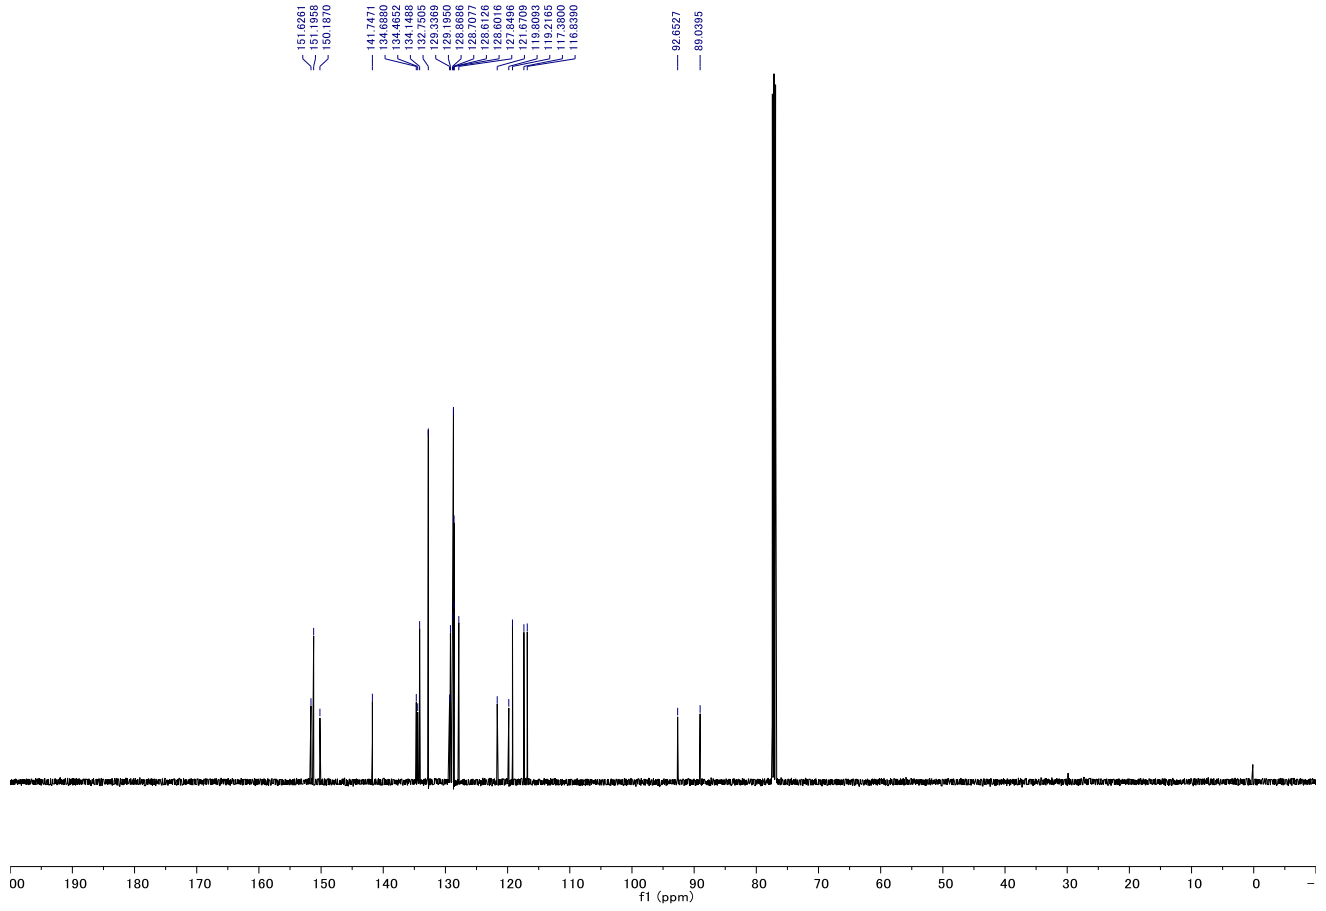

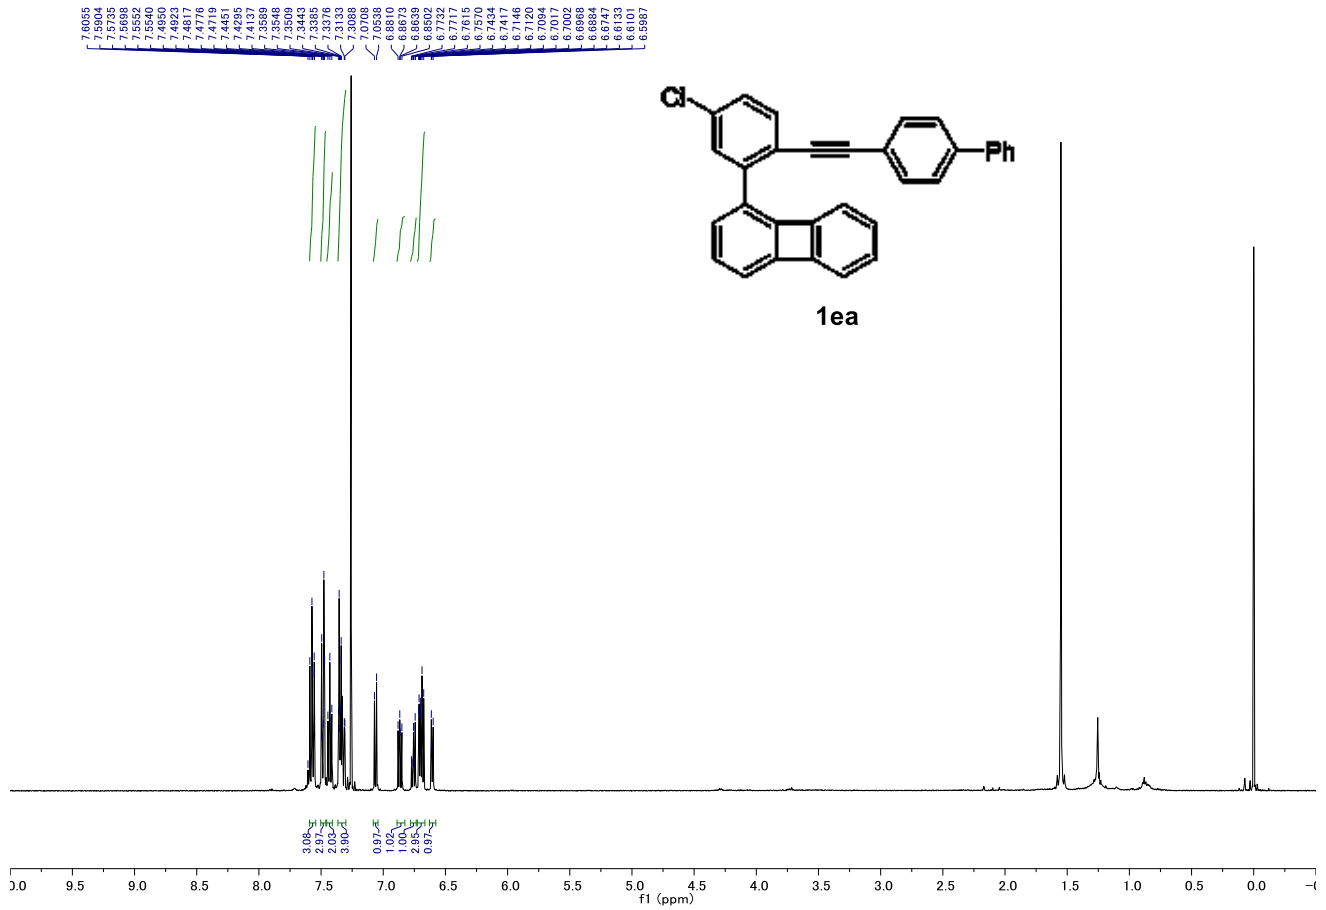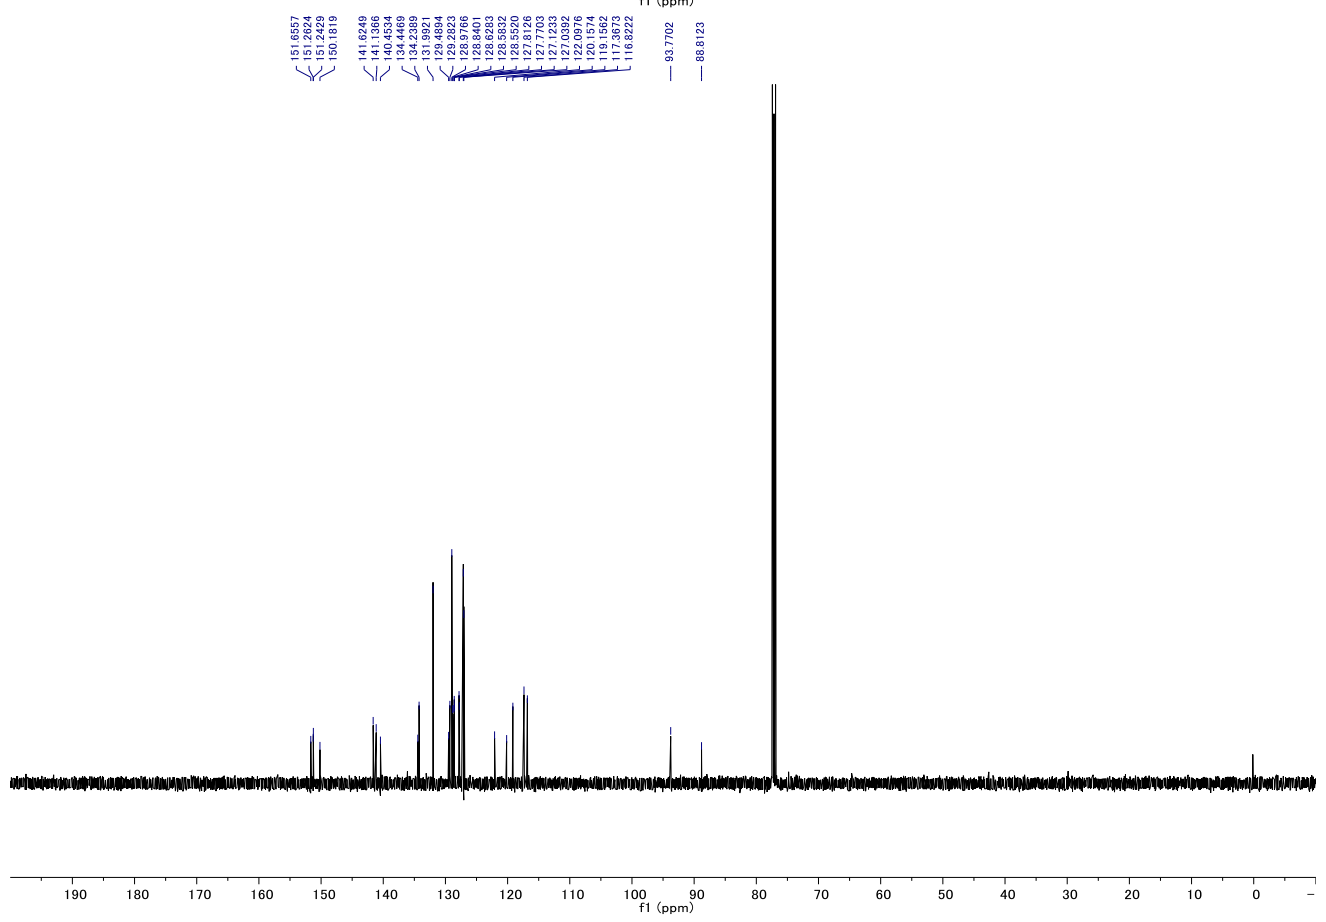

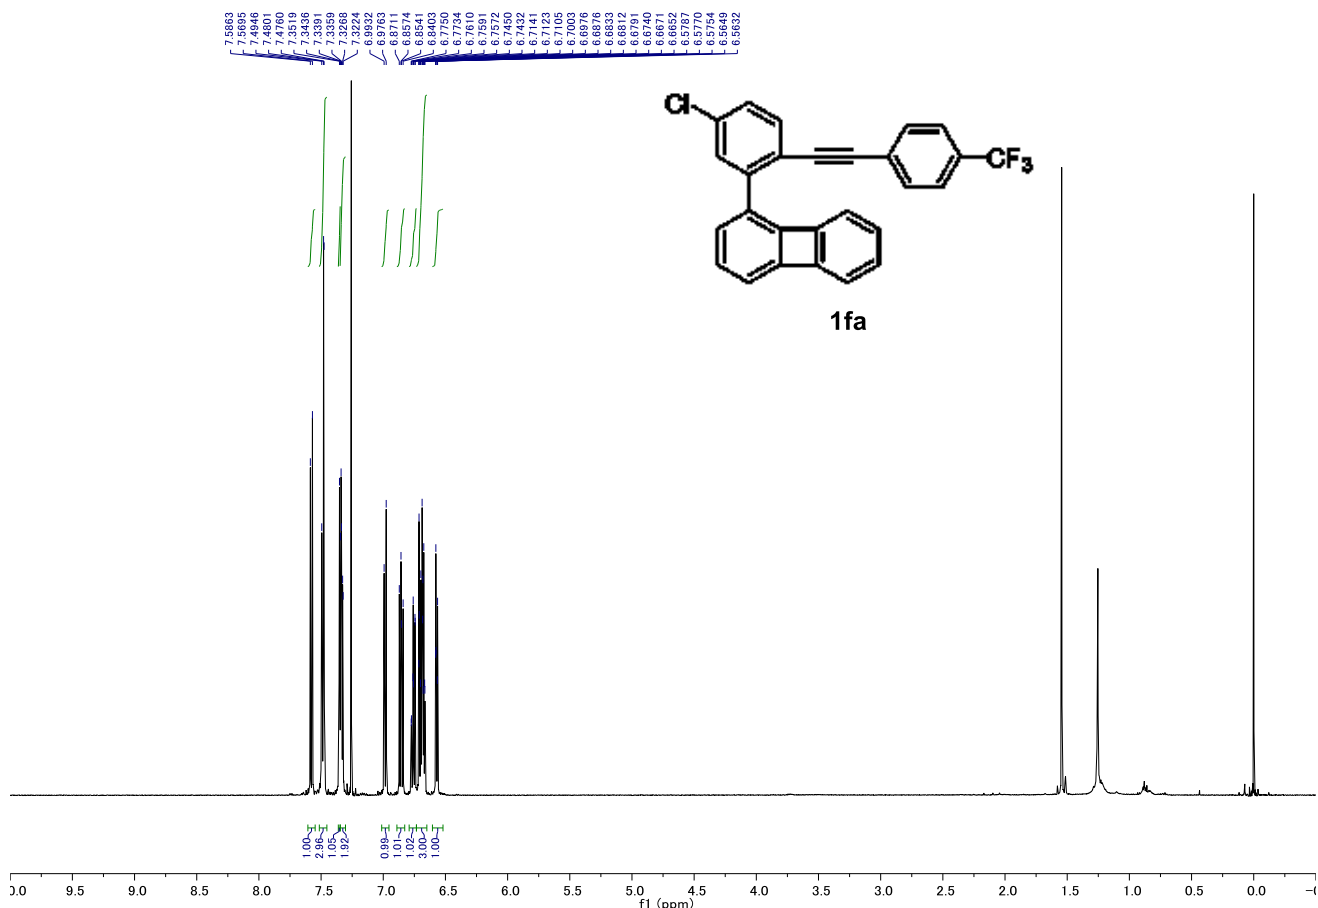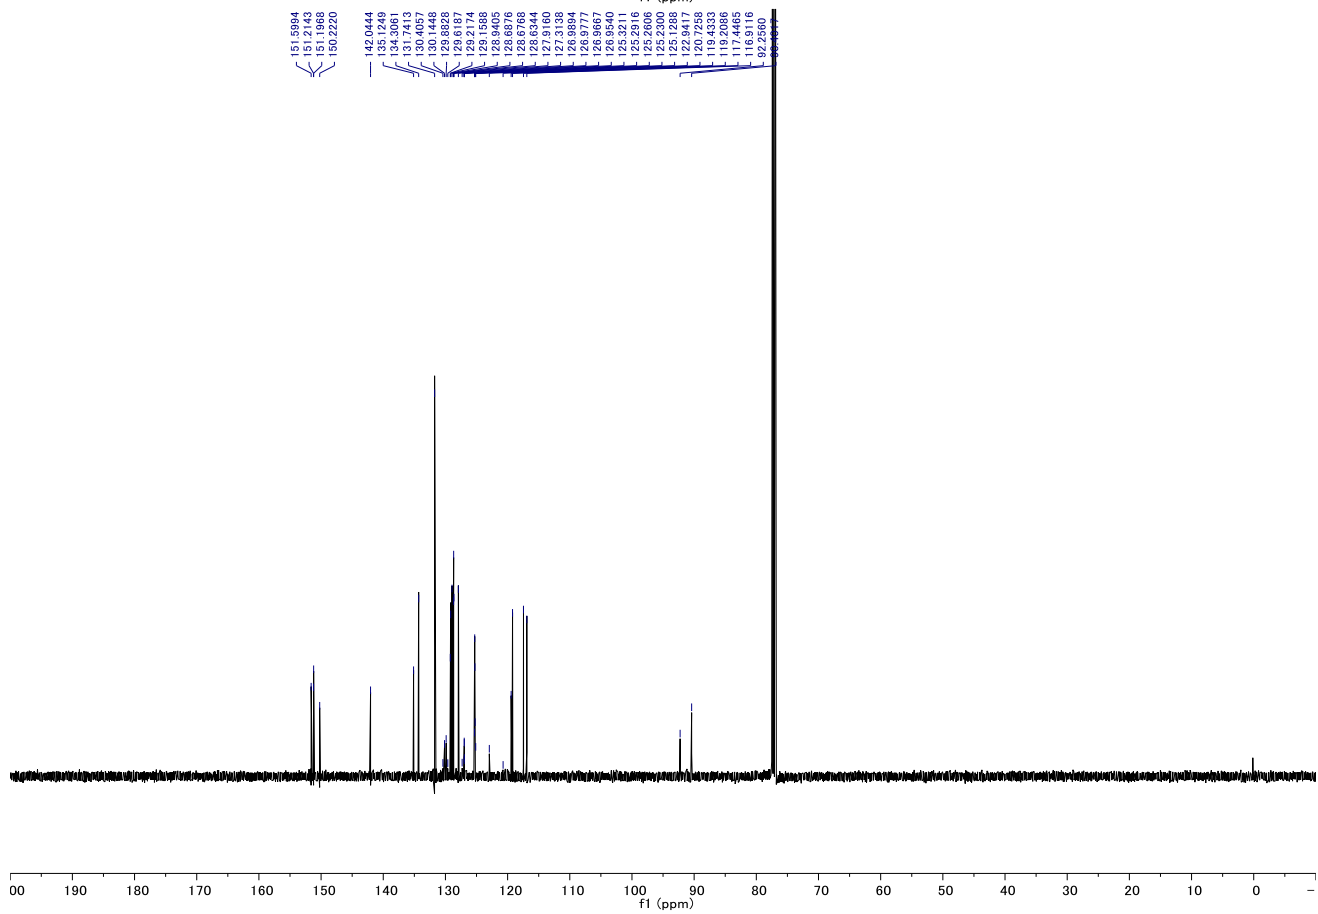



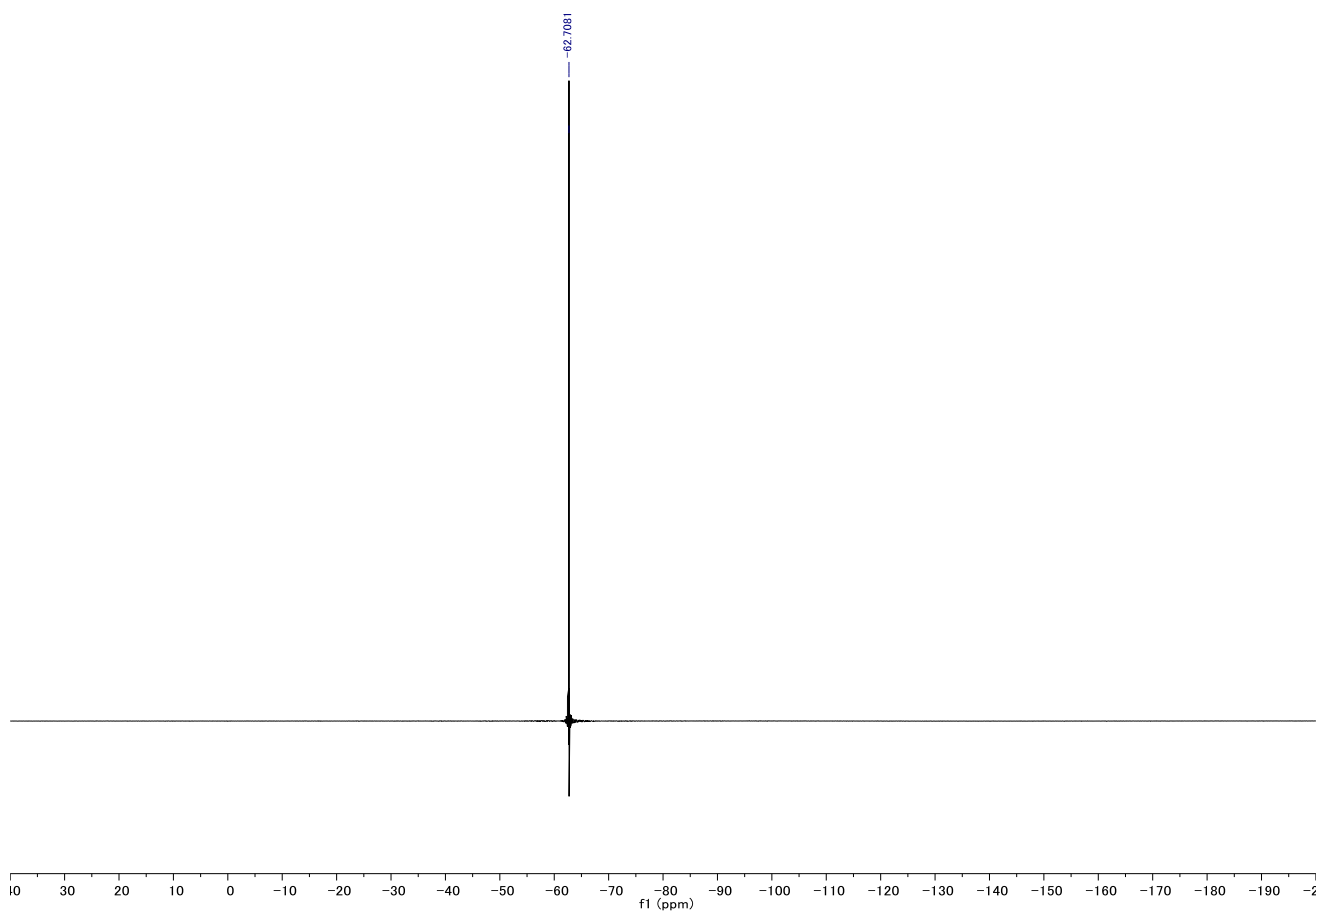

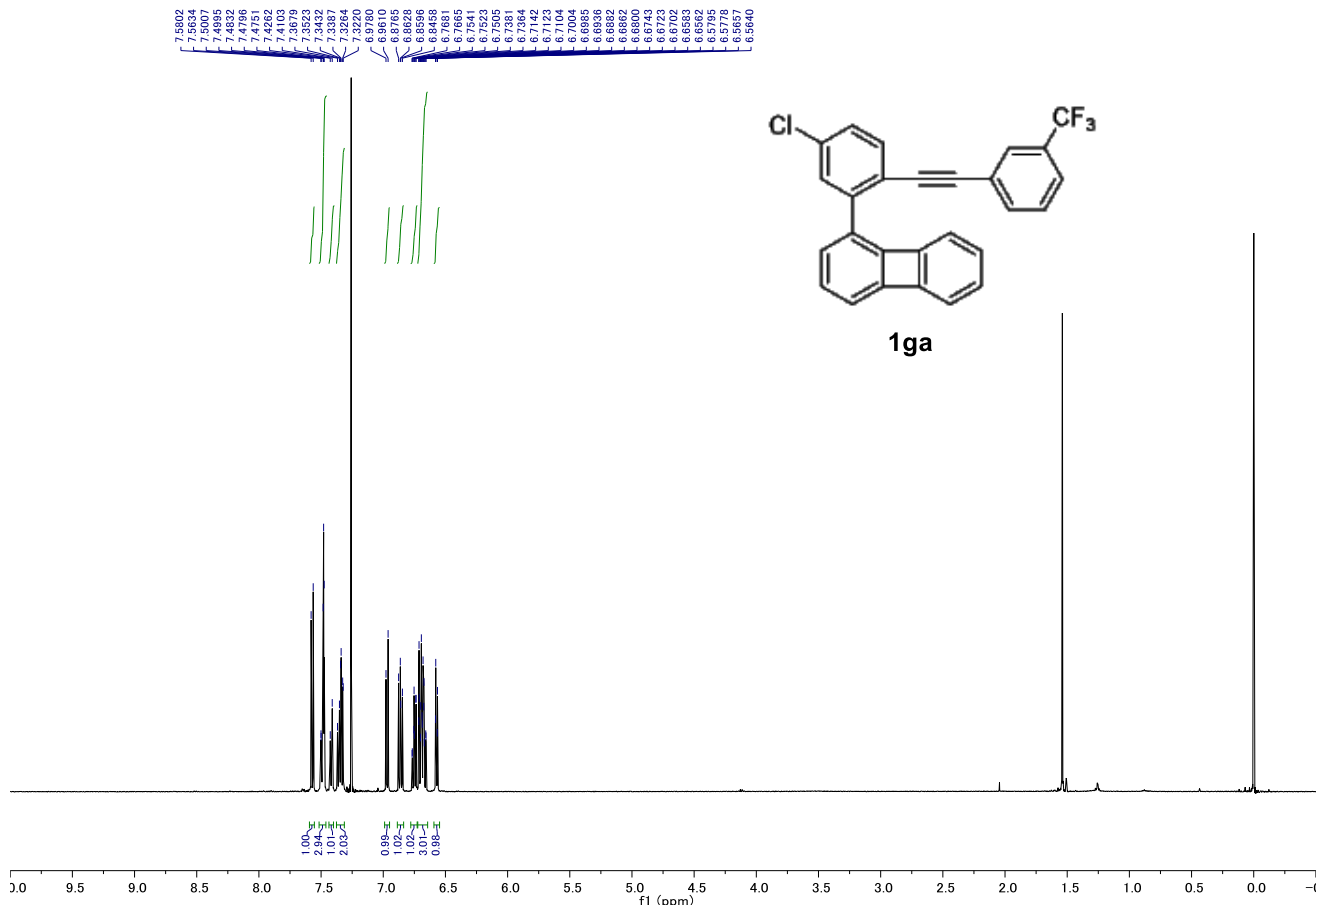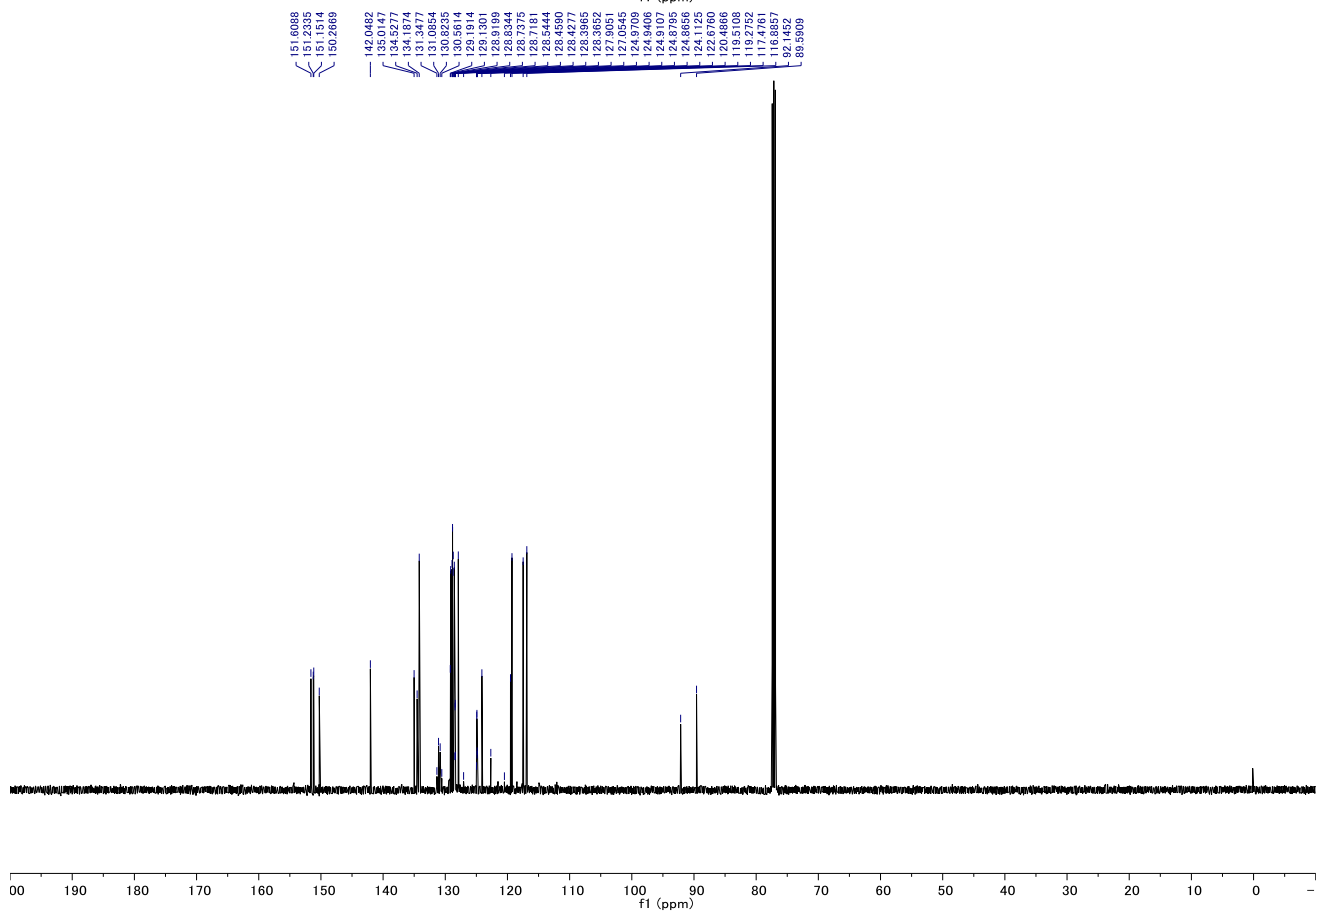

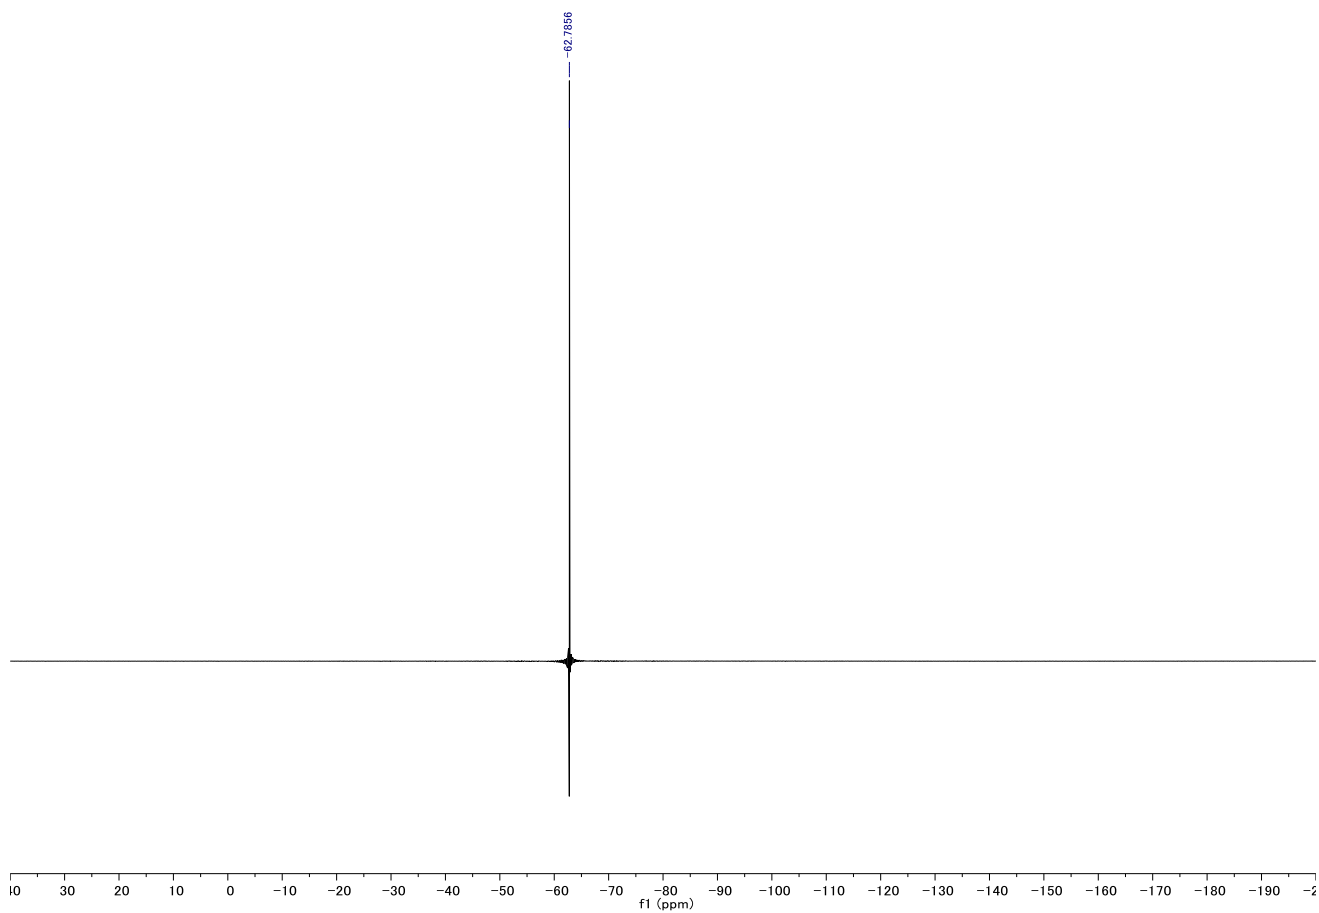

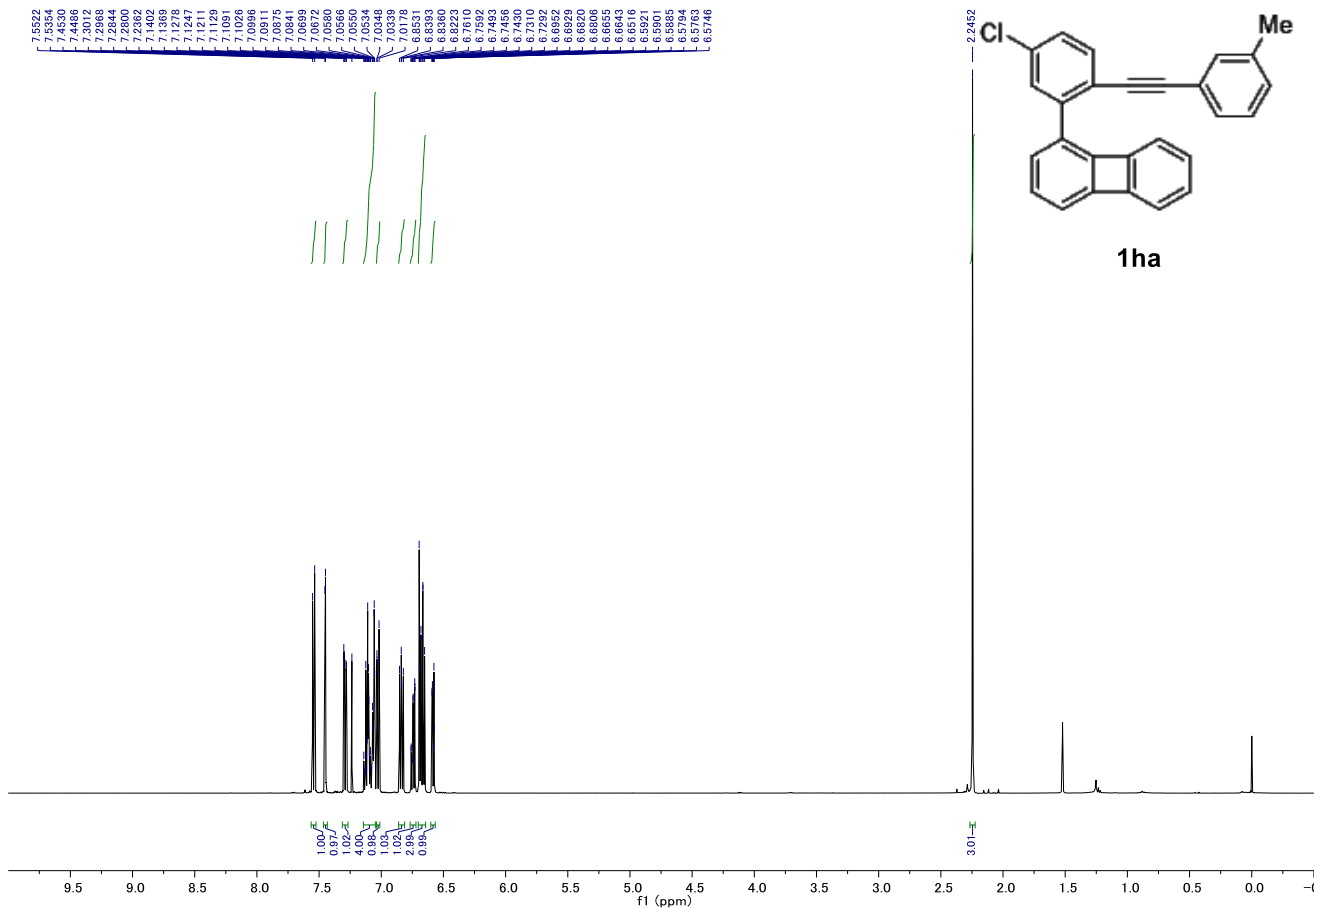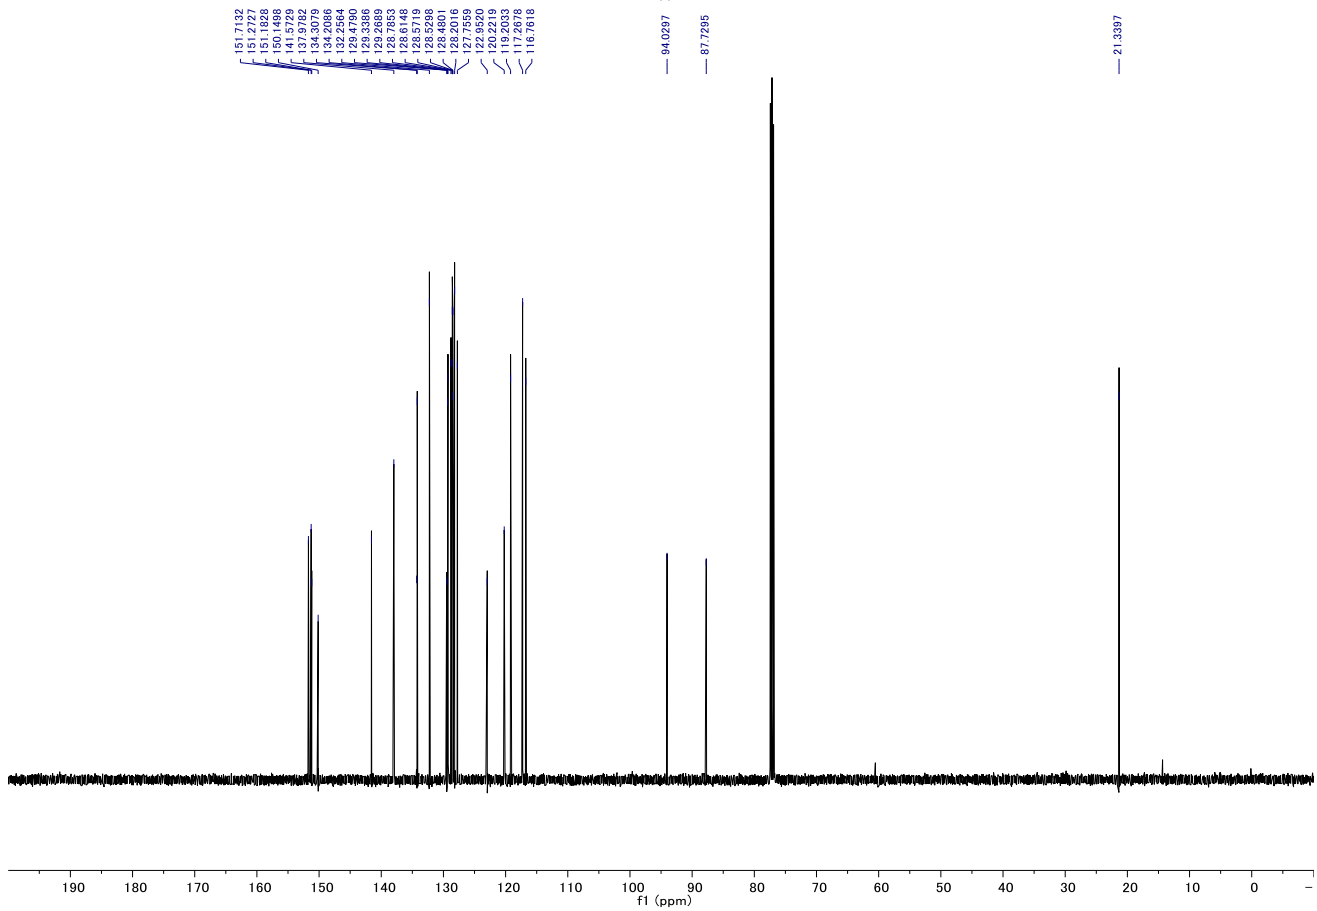

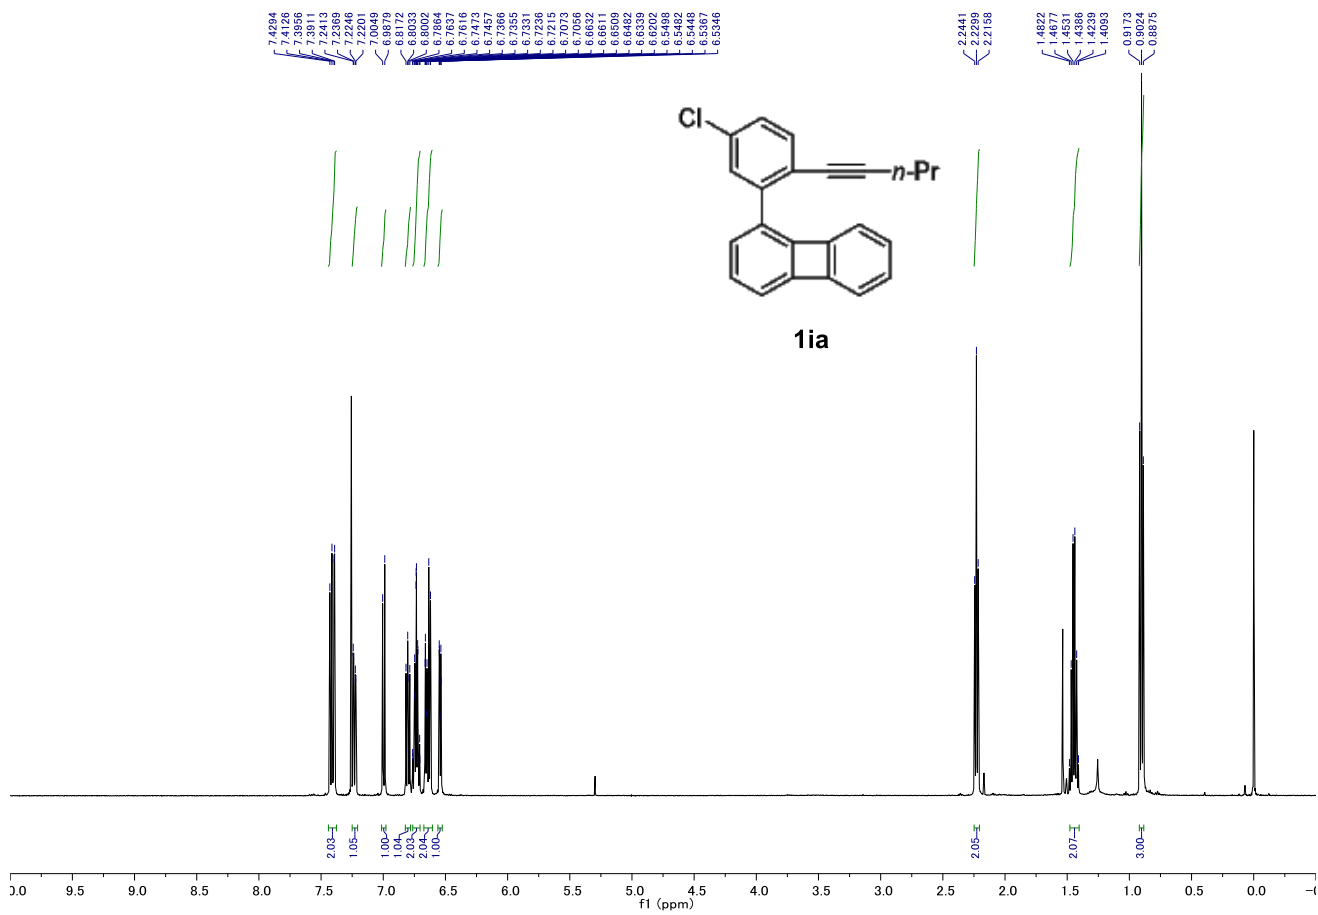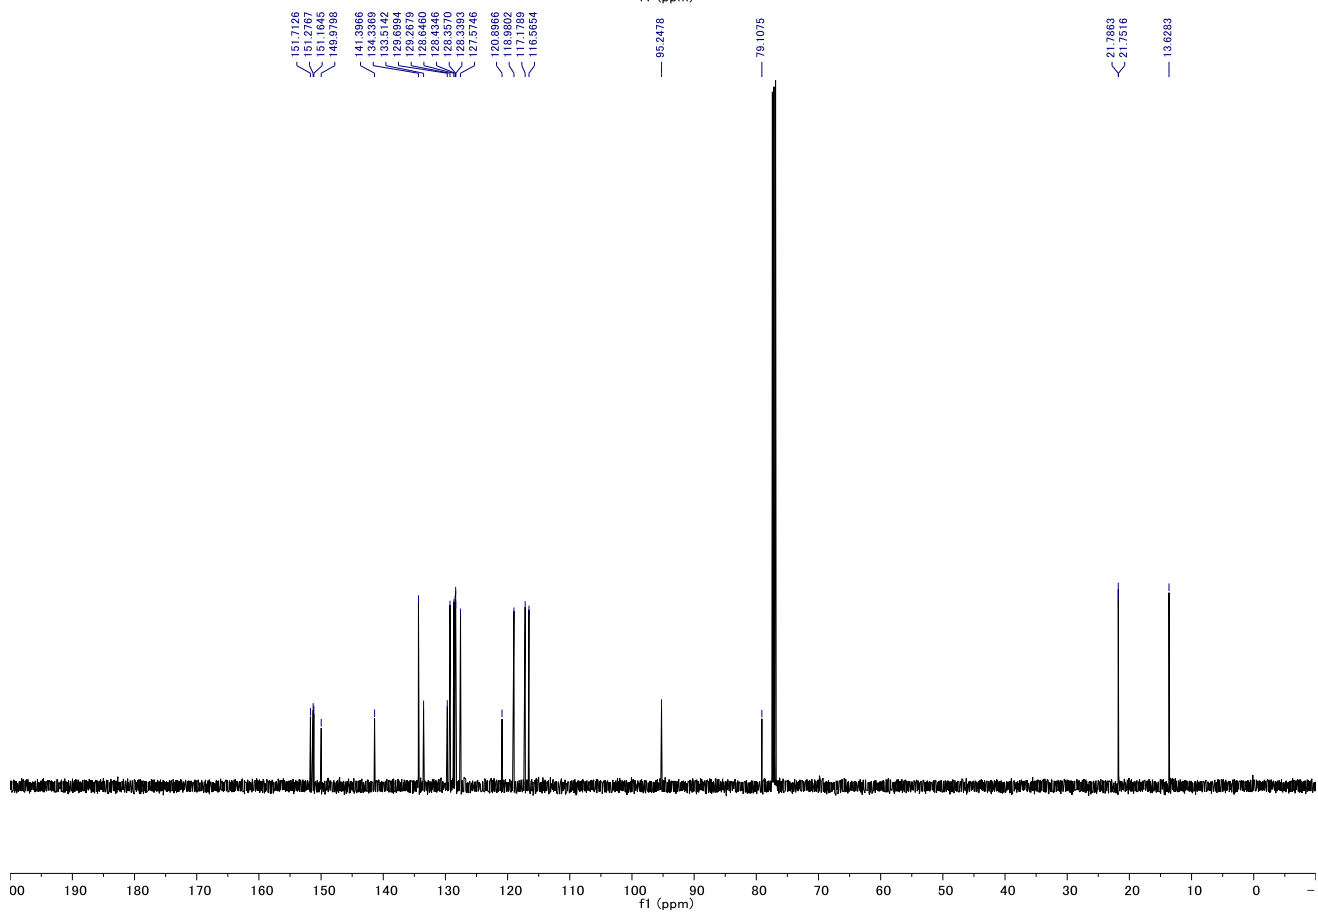

8.7447  
8.7284  
8.5378  
8.0063  
7.9919  
7.9869  
7.8170  
7.8024  
7.7861  
7.7774  
7.7765  
7.7140  
7.7072  
7.7021  
7.6980  
7.6835  
7.6492  
7.6422  
7.6171  
7.6114  
7.6067  
7.6040  
7.5527  
7.5500  
7.5382  
7.5362  
7.5336  
7.5200  
7.4940  
7.4933  
7.4832  
7.4800  
7.0402  
7.0276  
7.0236  
6.8239  
6.8133

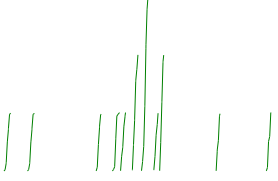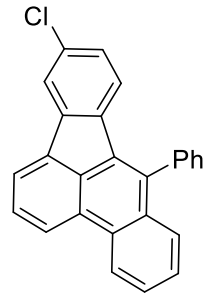

2aa

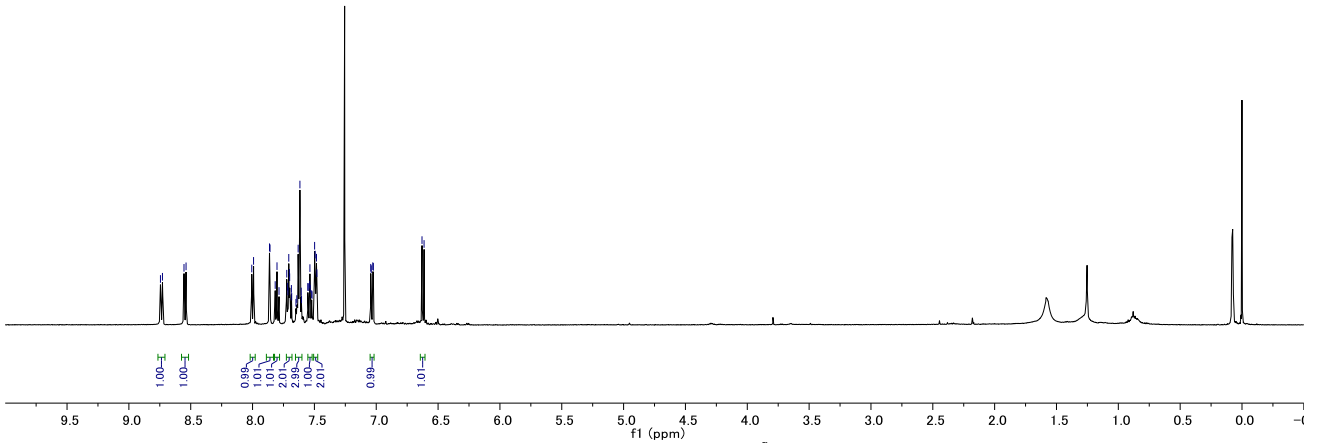

142.4727  
138.0049  
137.6989  
136.9000  
135.8336  
134.5387  
133.6989  
133.6903  
130.7806  
131.4351  
129.8663  
129.8603  
128.8900  
128.3696  
128.2413  
127.5400  
127.5142  
127.2142  
127.0289  
125.0018  
123.2019  
121.5206  
120.8851

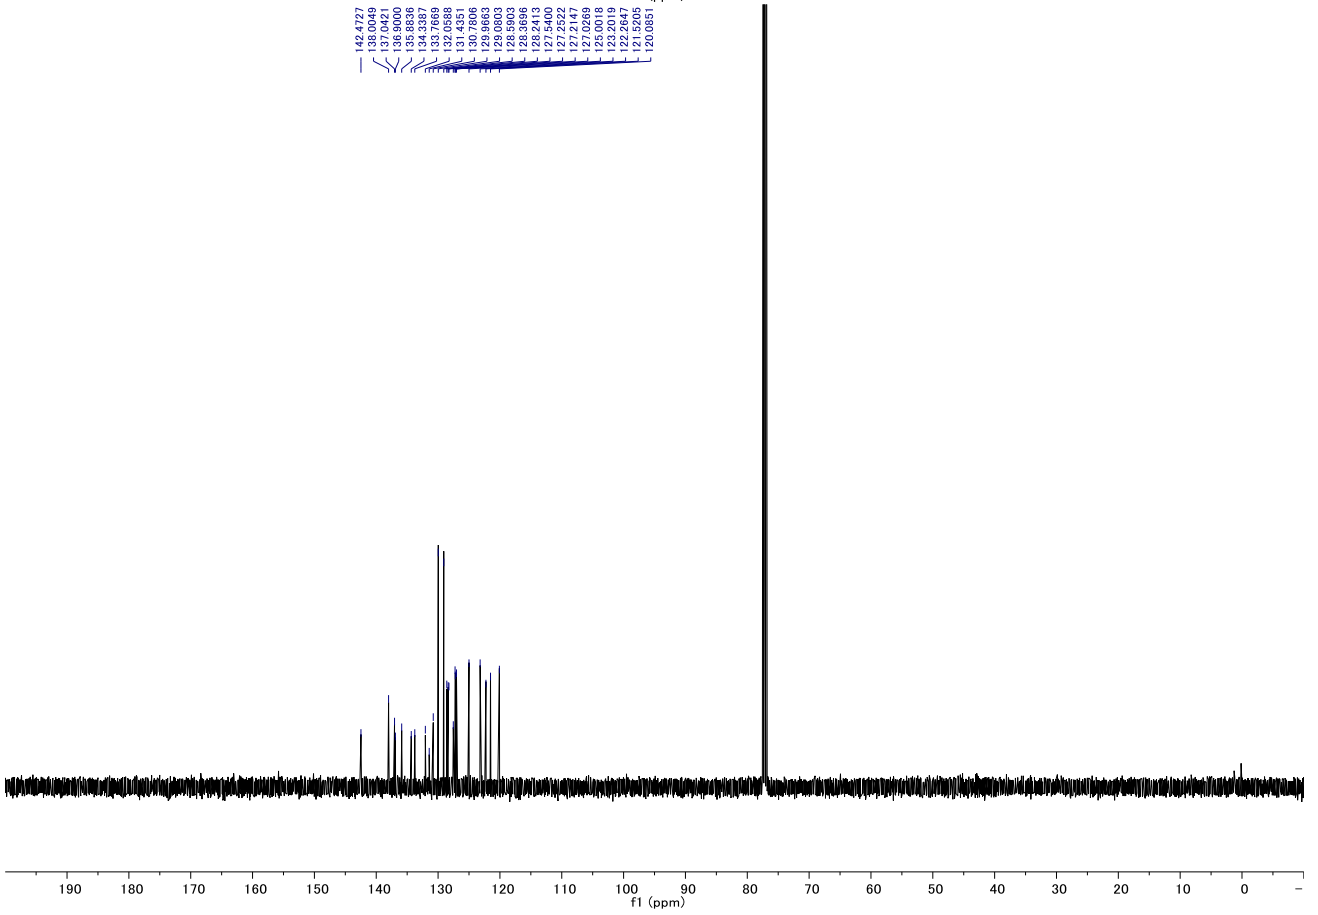

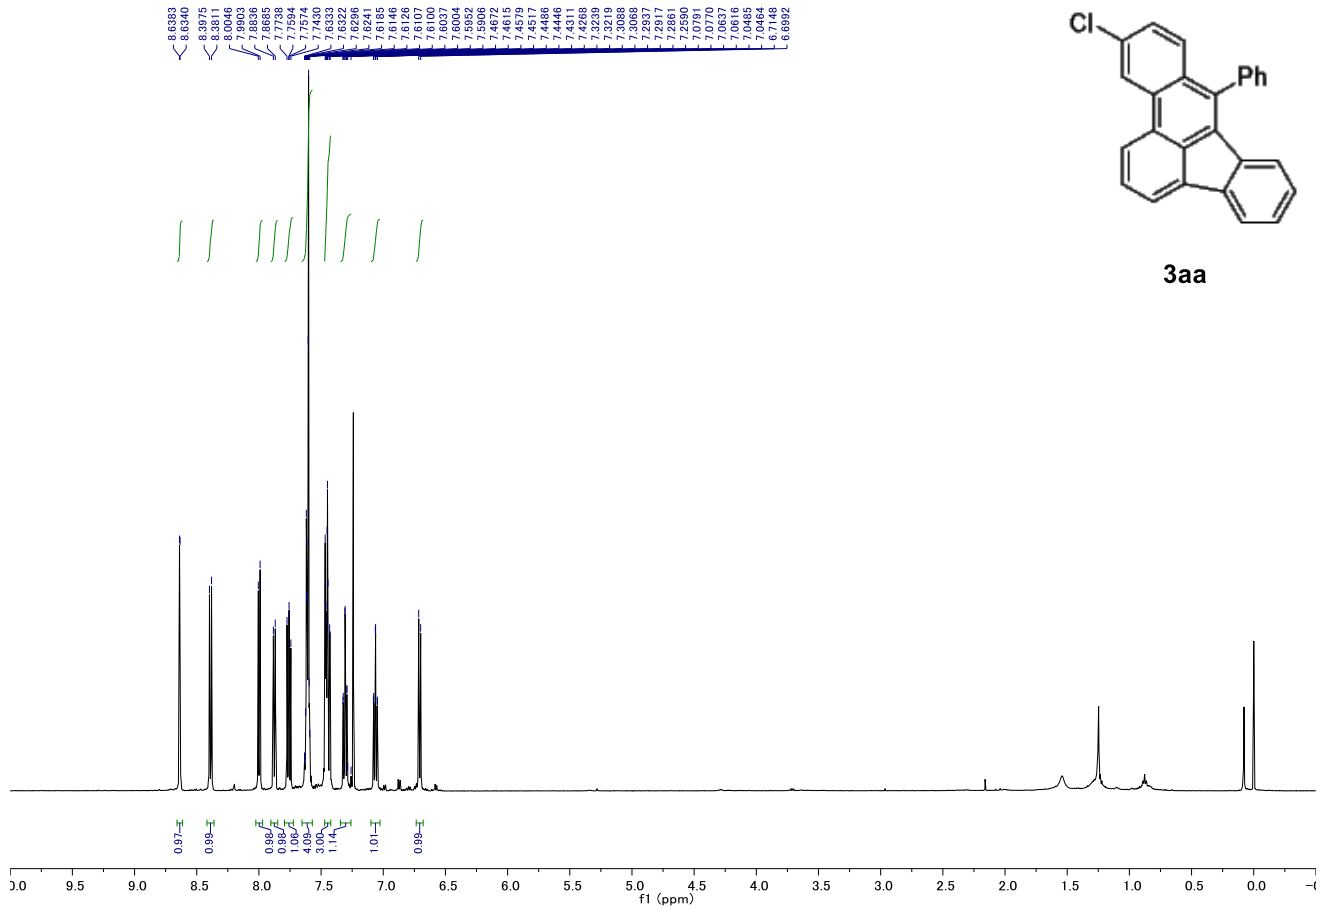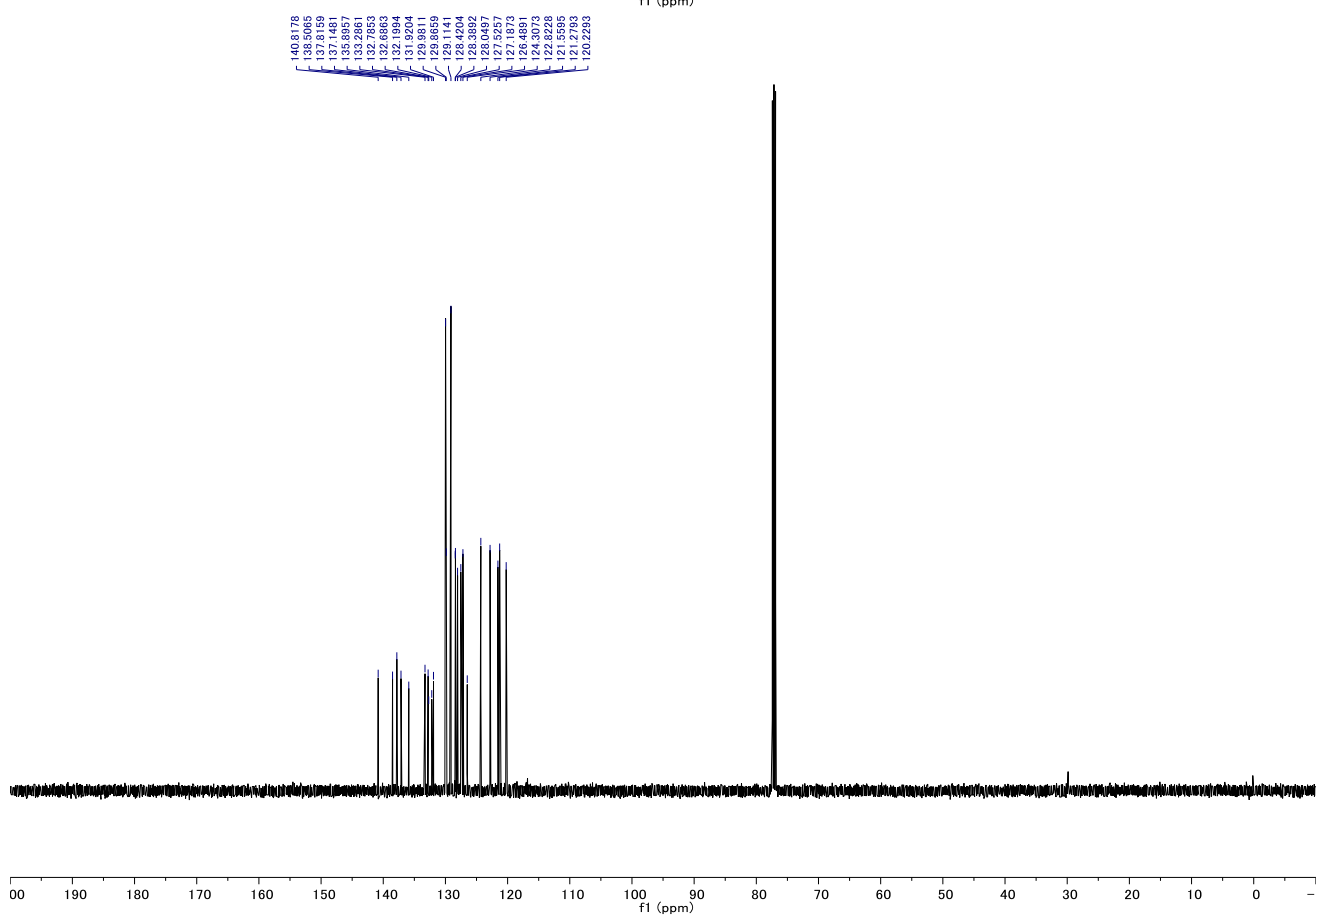

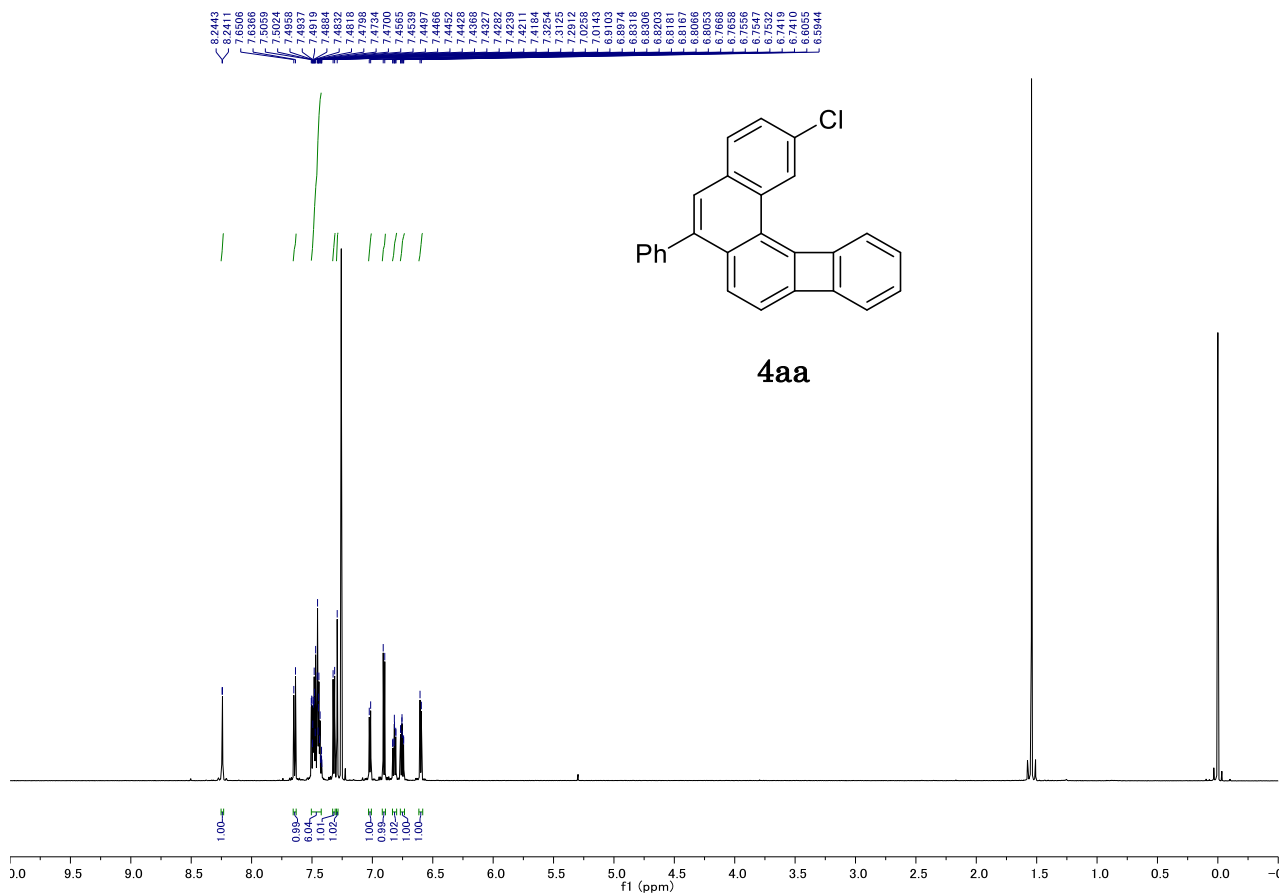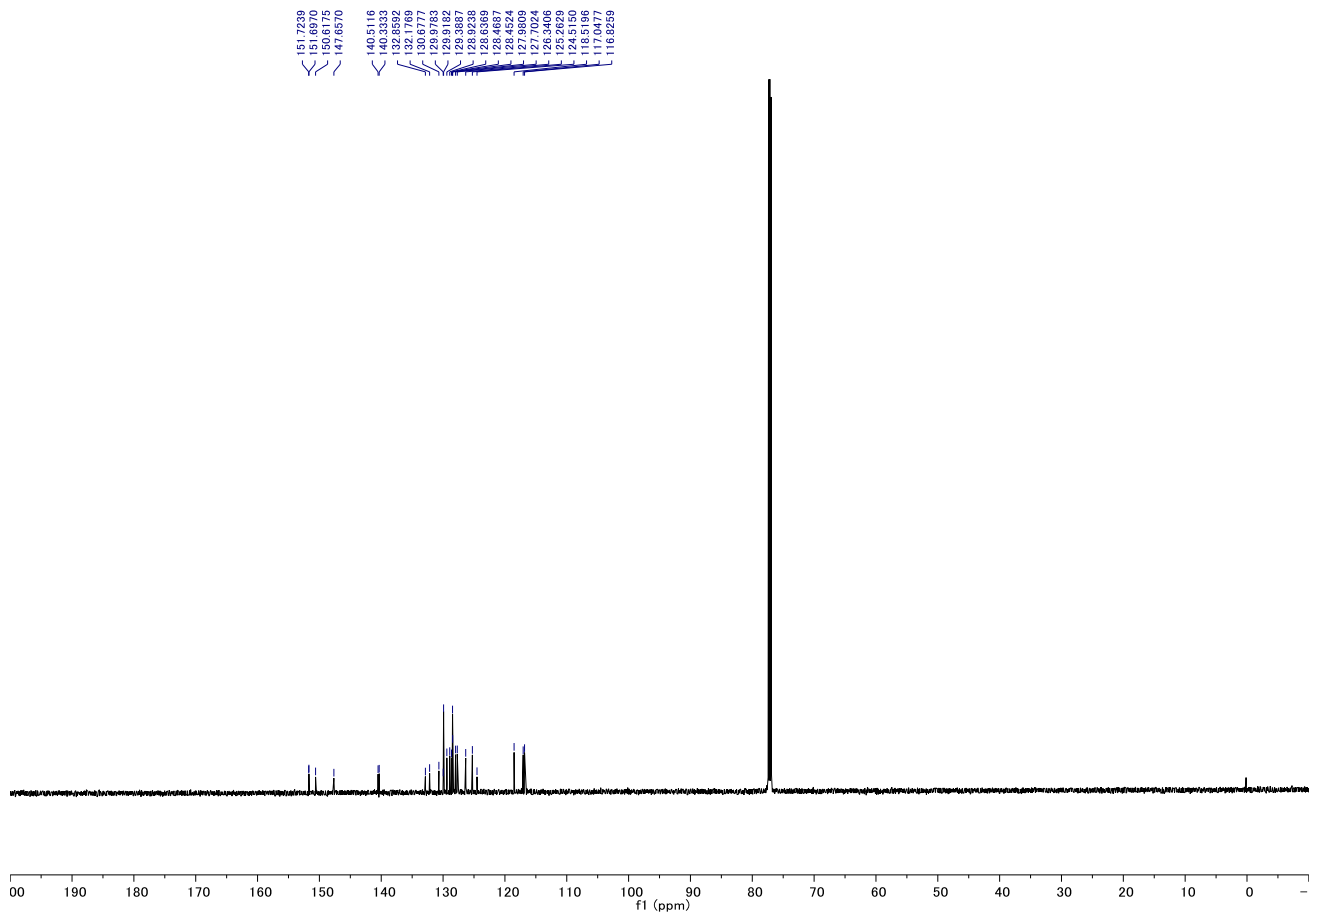



8.7383 8.7230 8.6972 8.6473 8.3086 8.2925 8.0194 7.9971 7.9074 7.8922 7.7970 7.7827 7.7683 7.7202 7.7188 7.7045 7.6888 7.7021 7.6948 7.6823 7.6807 7.6664 7.6759 7.6623 7.6461 7.6461 7.6408 7.6375 7.6285 7.6252 7.6172 7.6149 7.6137 7.6112 7.6112 7.6042 7.5987 7.5971 7.5960 7.5912 7.5812 7.5781 7.5621 7.5585 7.5585 7.5448 7.5358 7.5332 7.5312 7.5163 7.5163 7.5050 7.5033 7.4904 7.4904 7.4752 7.4686 7.4642 7.4395 7.4395 7.4350 7.4279 7.4258 7.4258 7.4249 7.4249 7.4238 7.4238 7.3265 7.3244 7.3244 7.3165 7.3165 7.3094 7.3094 7.2964 7.2942 7.2942 7.1639 7.1639 7.1614 7.1614 7.1314 7.1314 7.0846 7.0824 7.0824 7.0693 7.0693 7.0540 7.0540 7.0242 7.0242 6.9966 6.9966 6.8782 6.7783 6.7666 6.7666 6.7420 6.7420 6.7404 6.7283 6.7249 6.7249 6.6915 6.6915 6.5988 6.5879 6.5879 6.5785 6.5785 6.5748

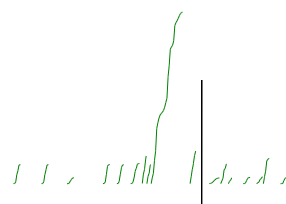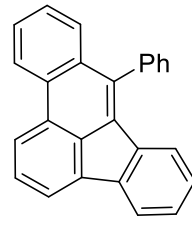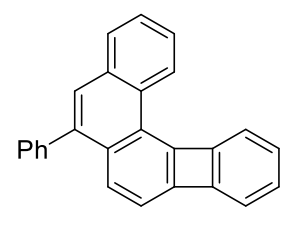

1.06 1.00 0.31 1.01 1.00 1.46 1.01 9.04 1.75 0.36 1.03 0.33 1.31 0.33

f1 (ppm)

152.3098 151.8992 149.6452 147.4752 140.9358 140.8646 139.9888 138.3430 137.0827 136.4861 134.4338 132.4207 132.4085 131.8631 130.8072 129.0174 128.6624 128.5174 128.3893 128.1912 128.1637 128.1394 127.9322 127.5453 127.4542 127.3342 126.9327 126.8255 126.5247 125.9162 124.2779 123.1651 121.5790 121.6050 118.2669 116.6006 116.5485

f1 (ppm)

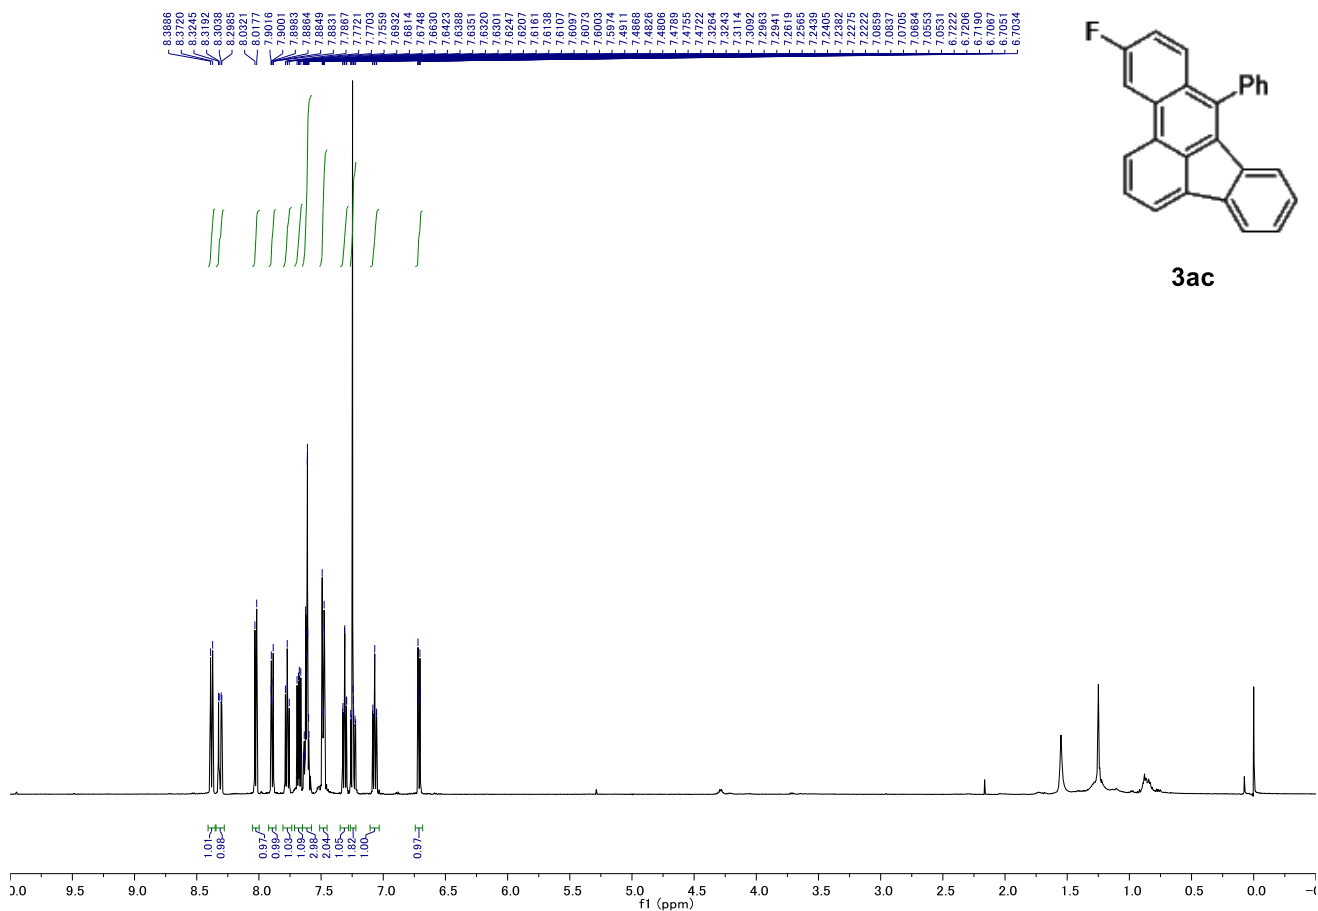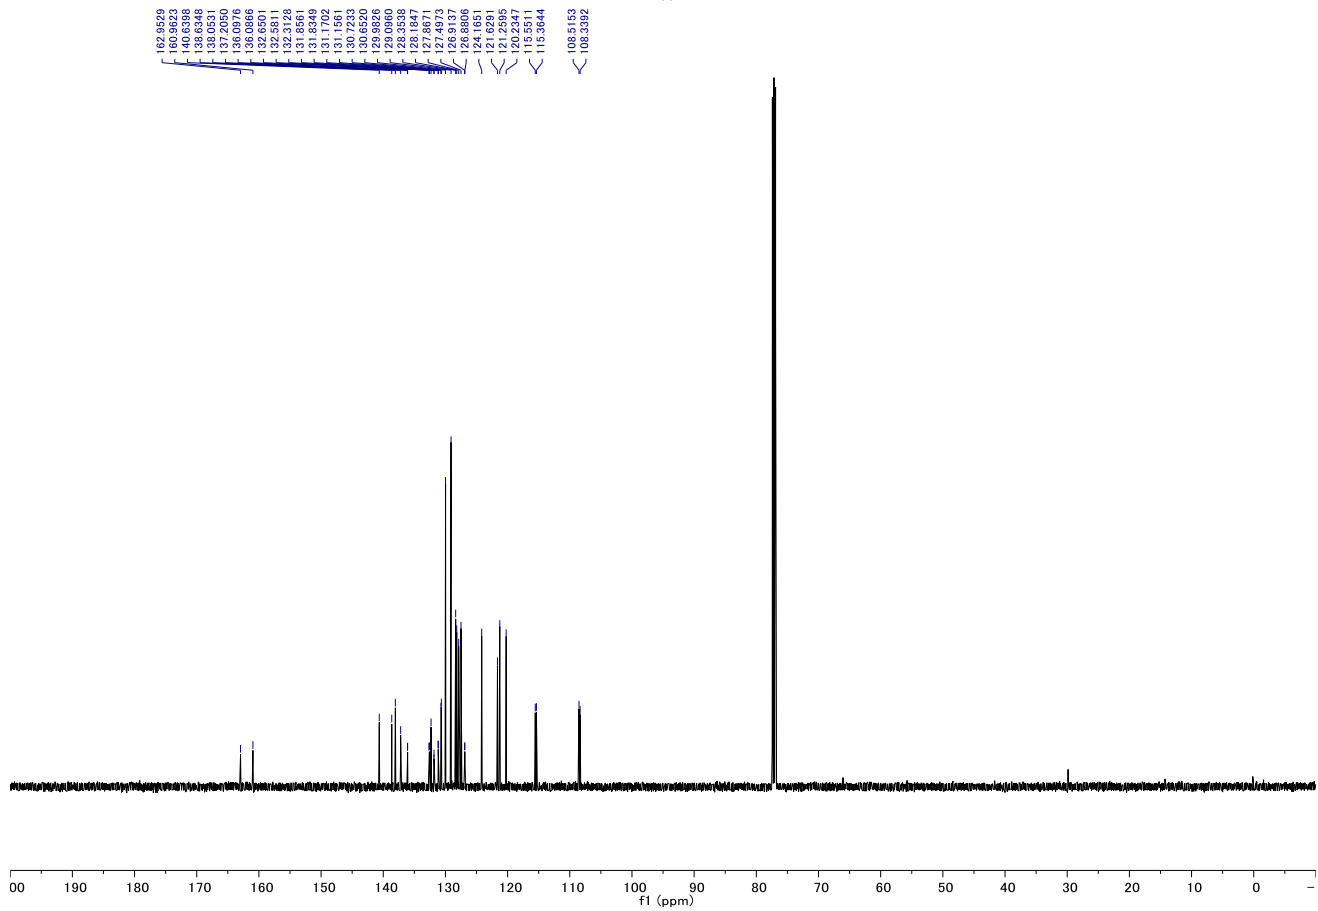

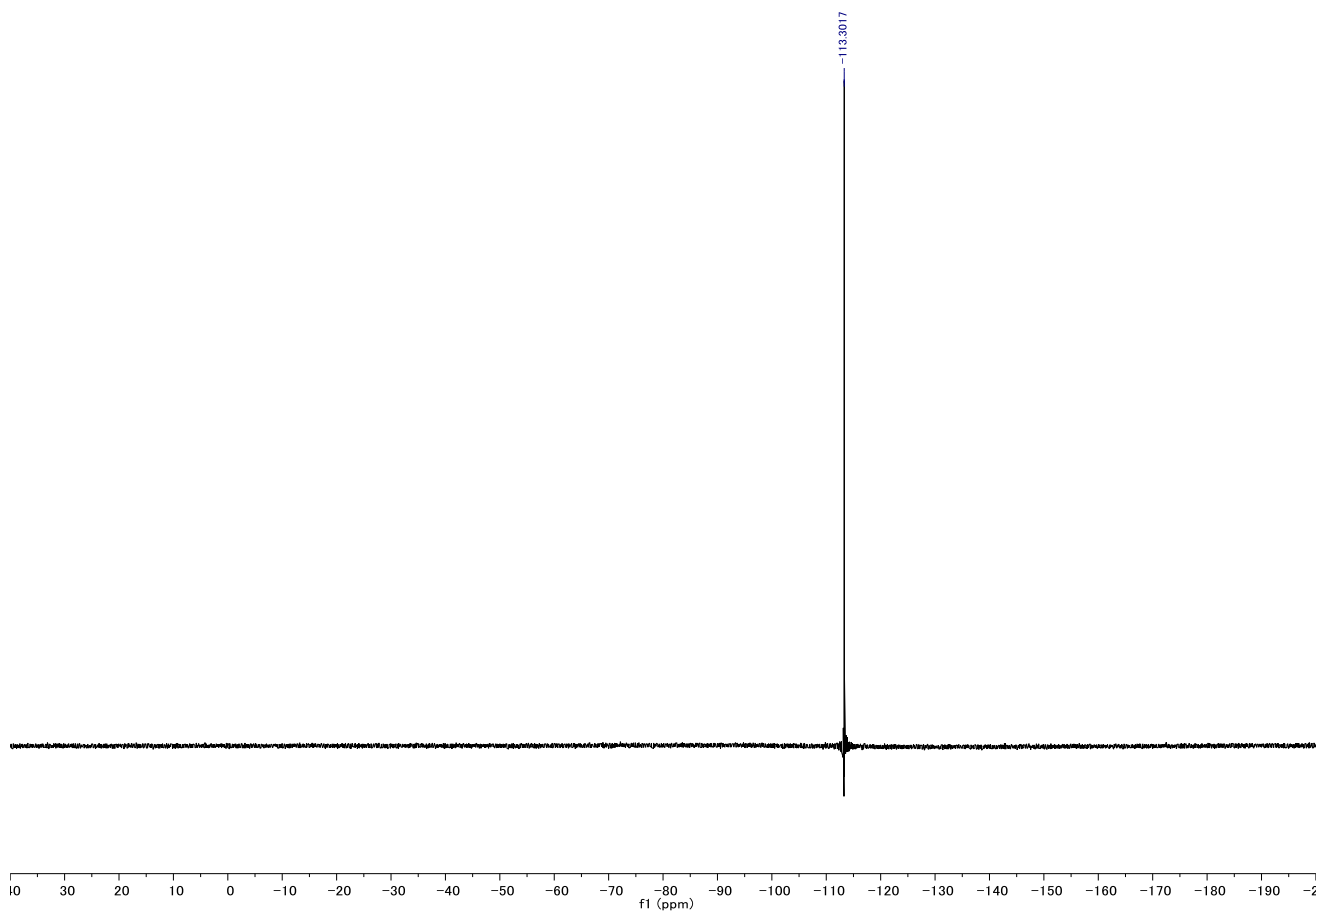

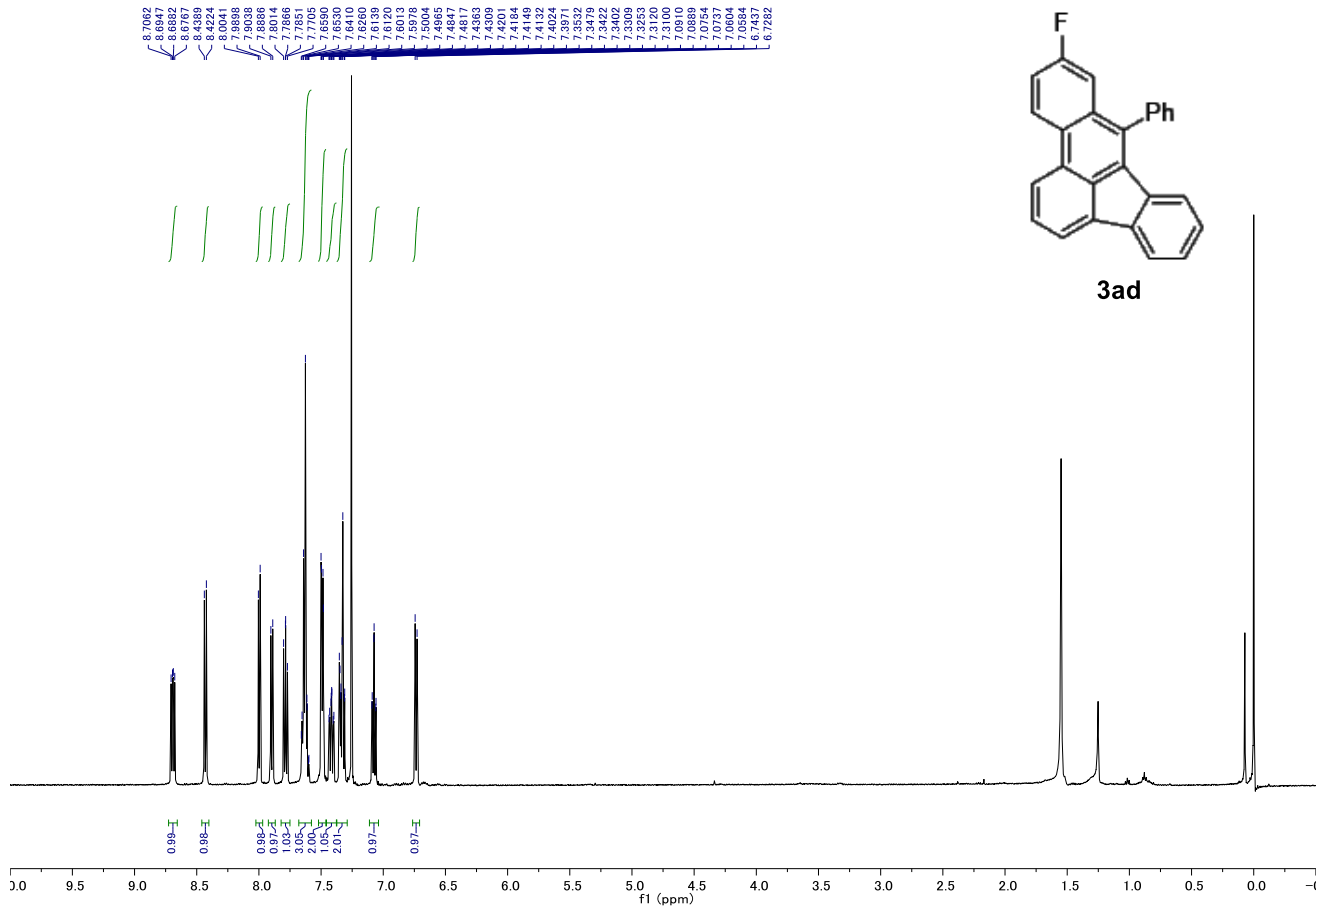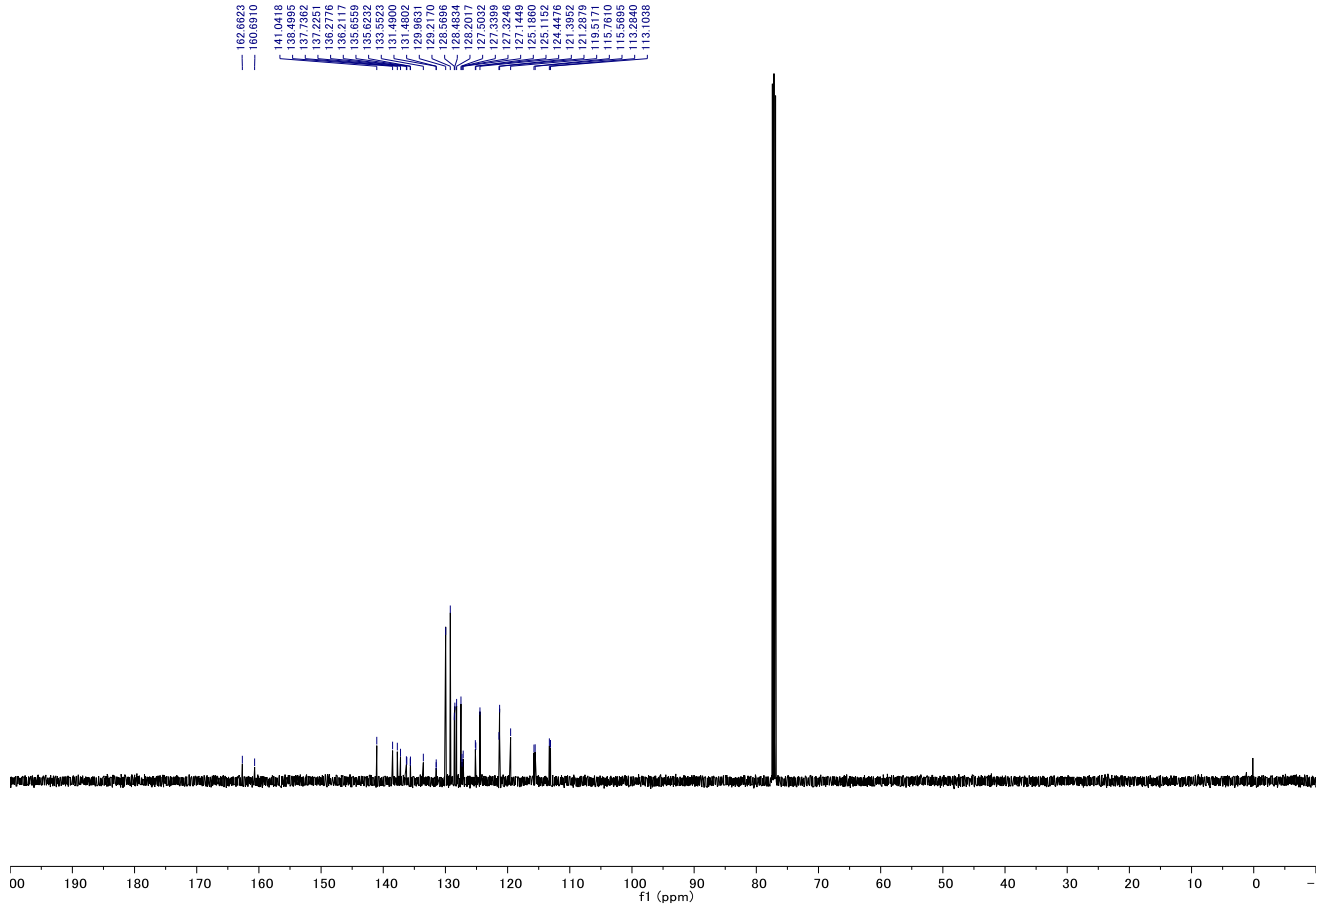

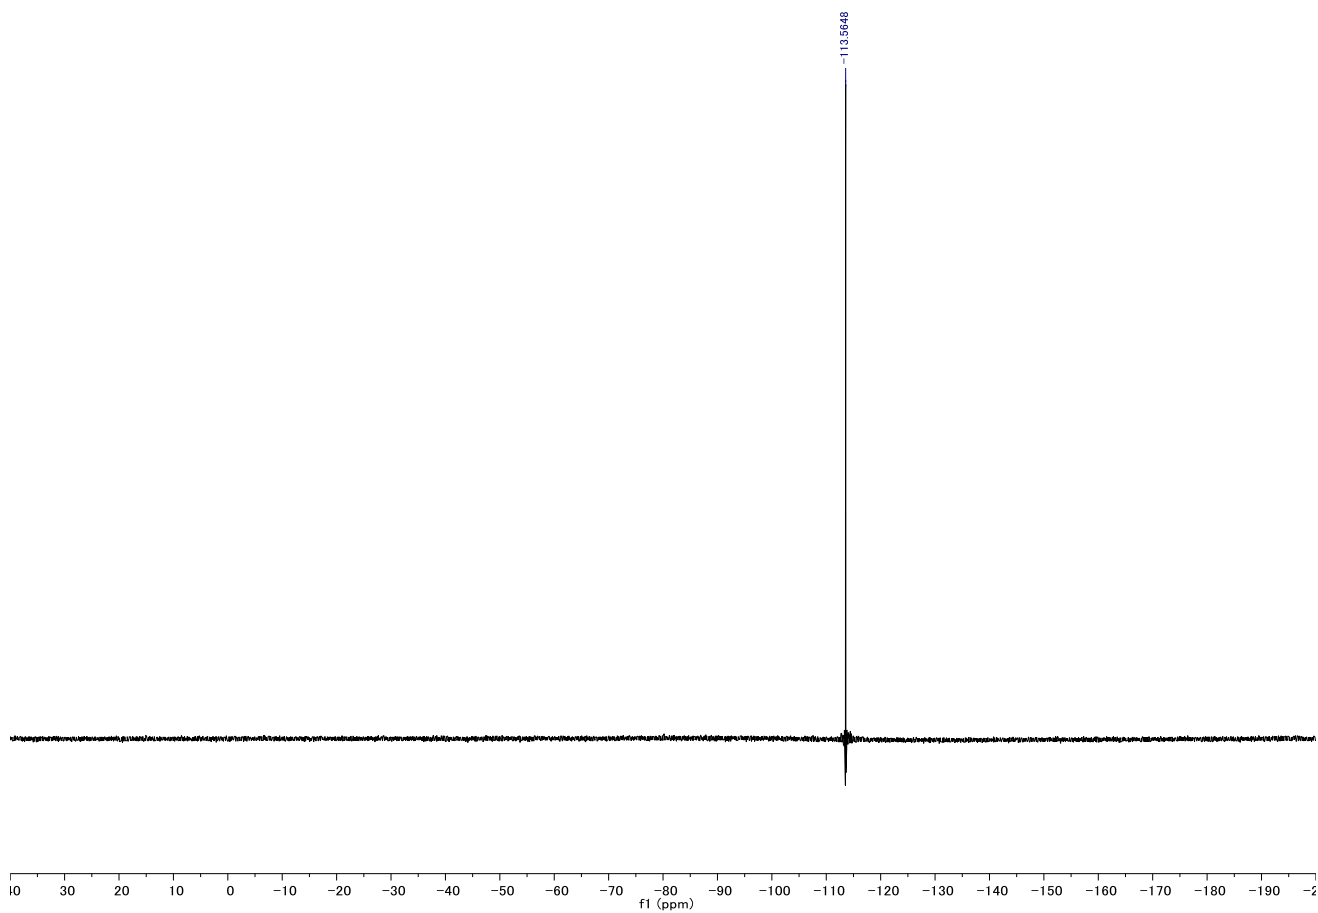

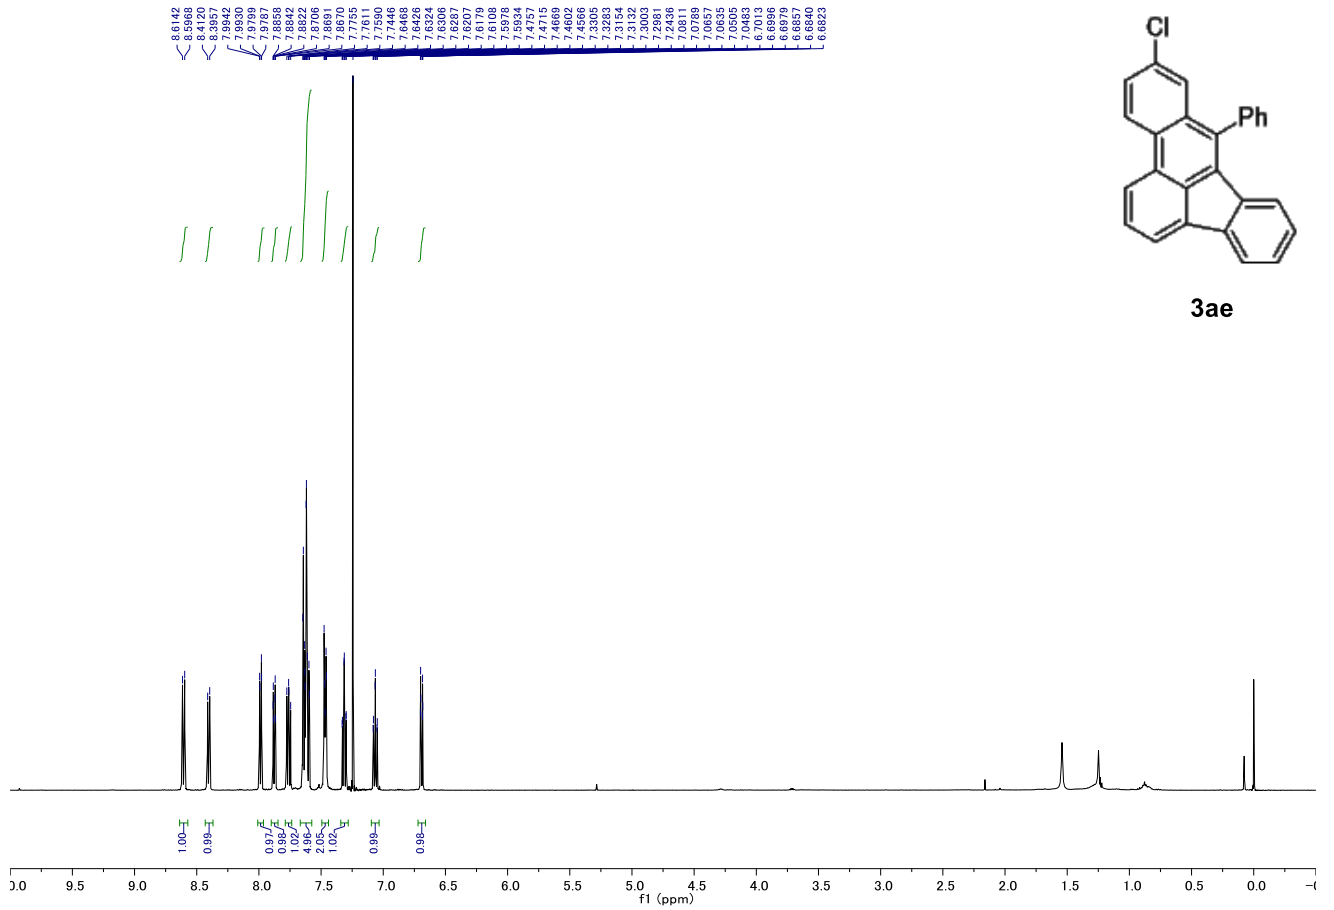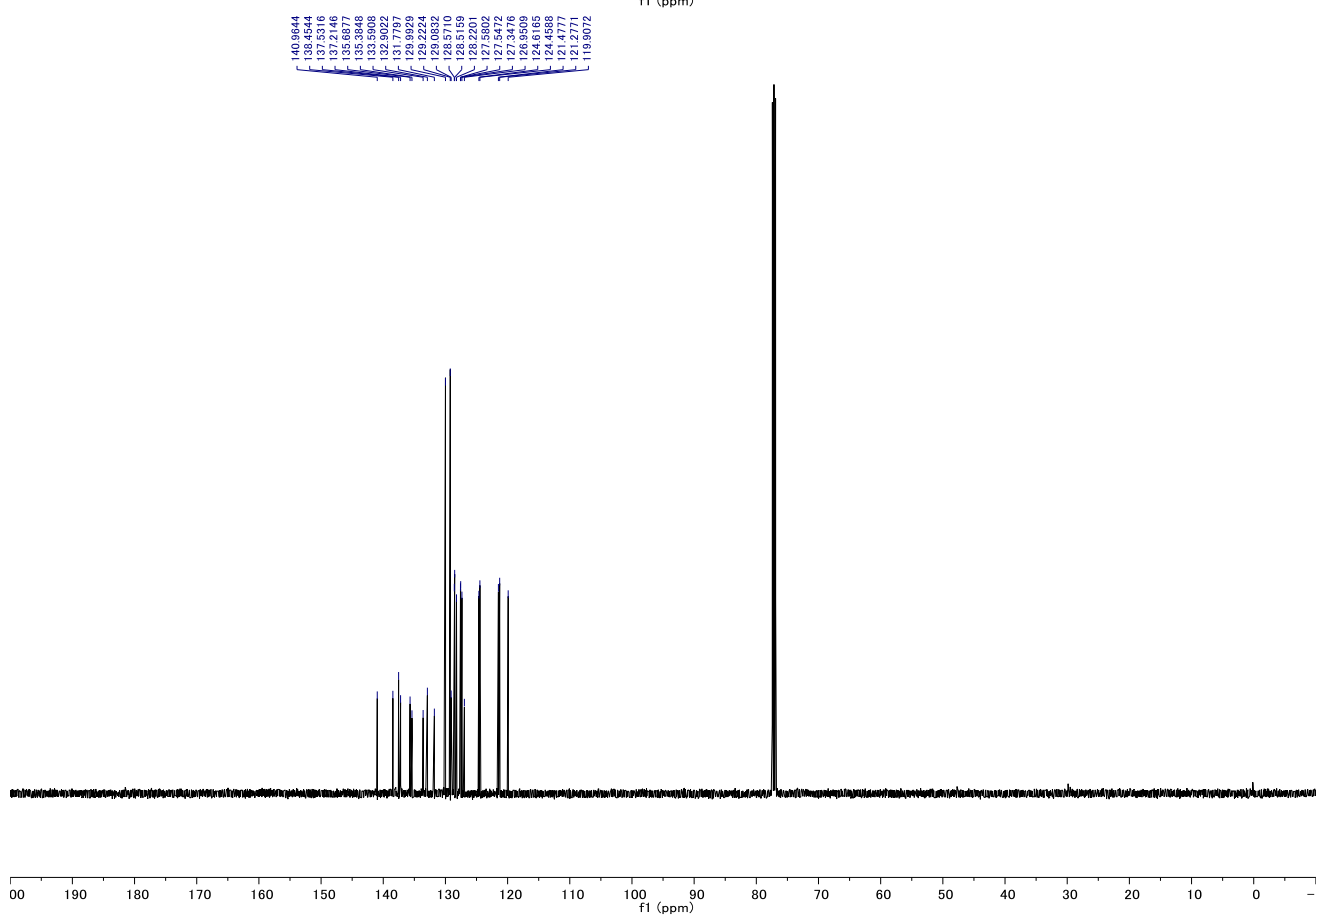

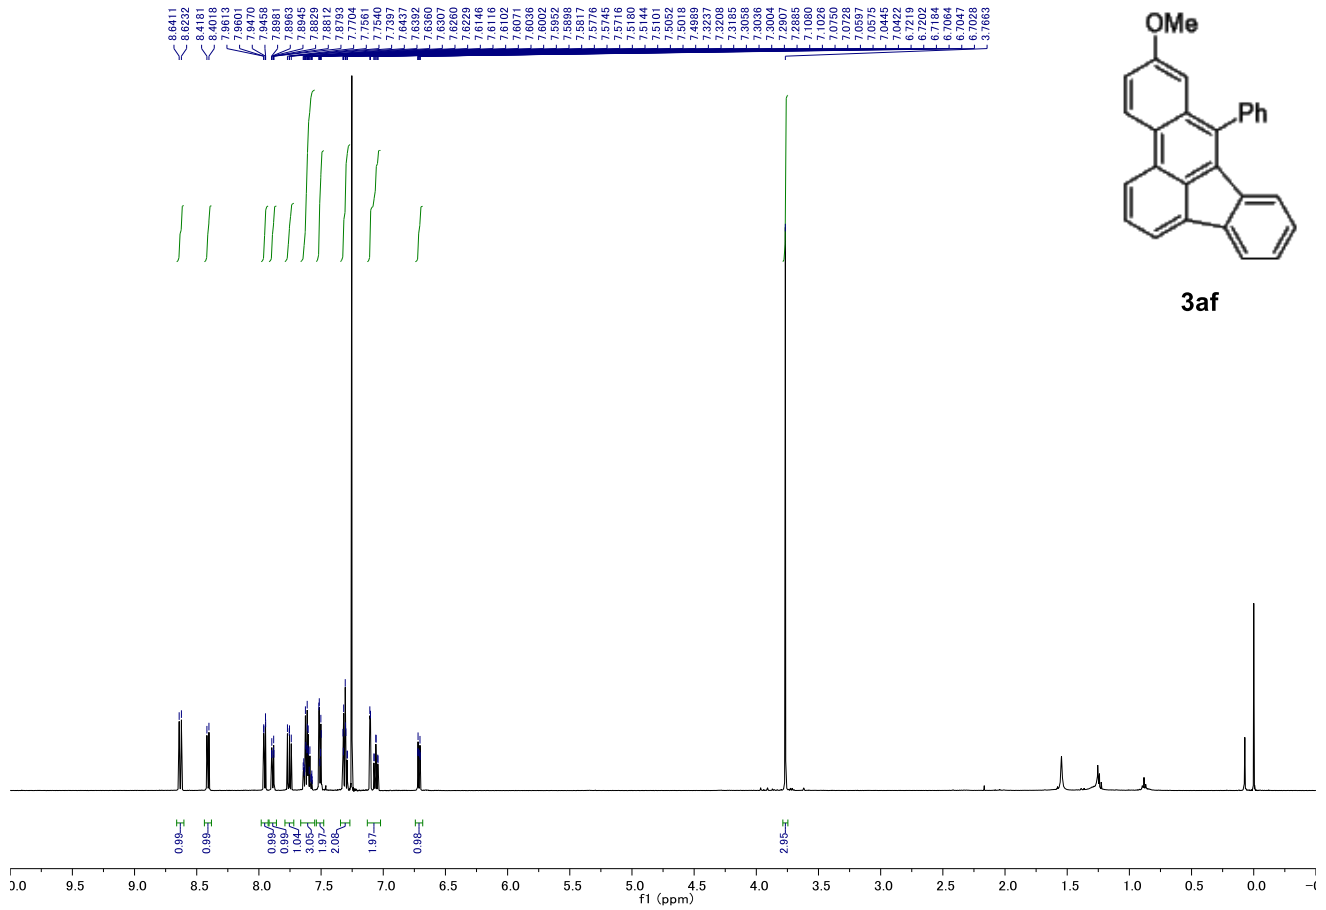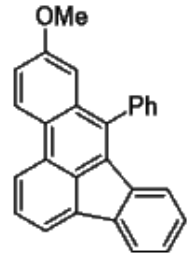

**3af**

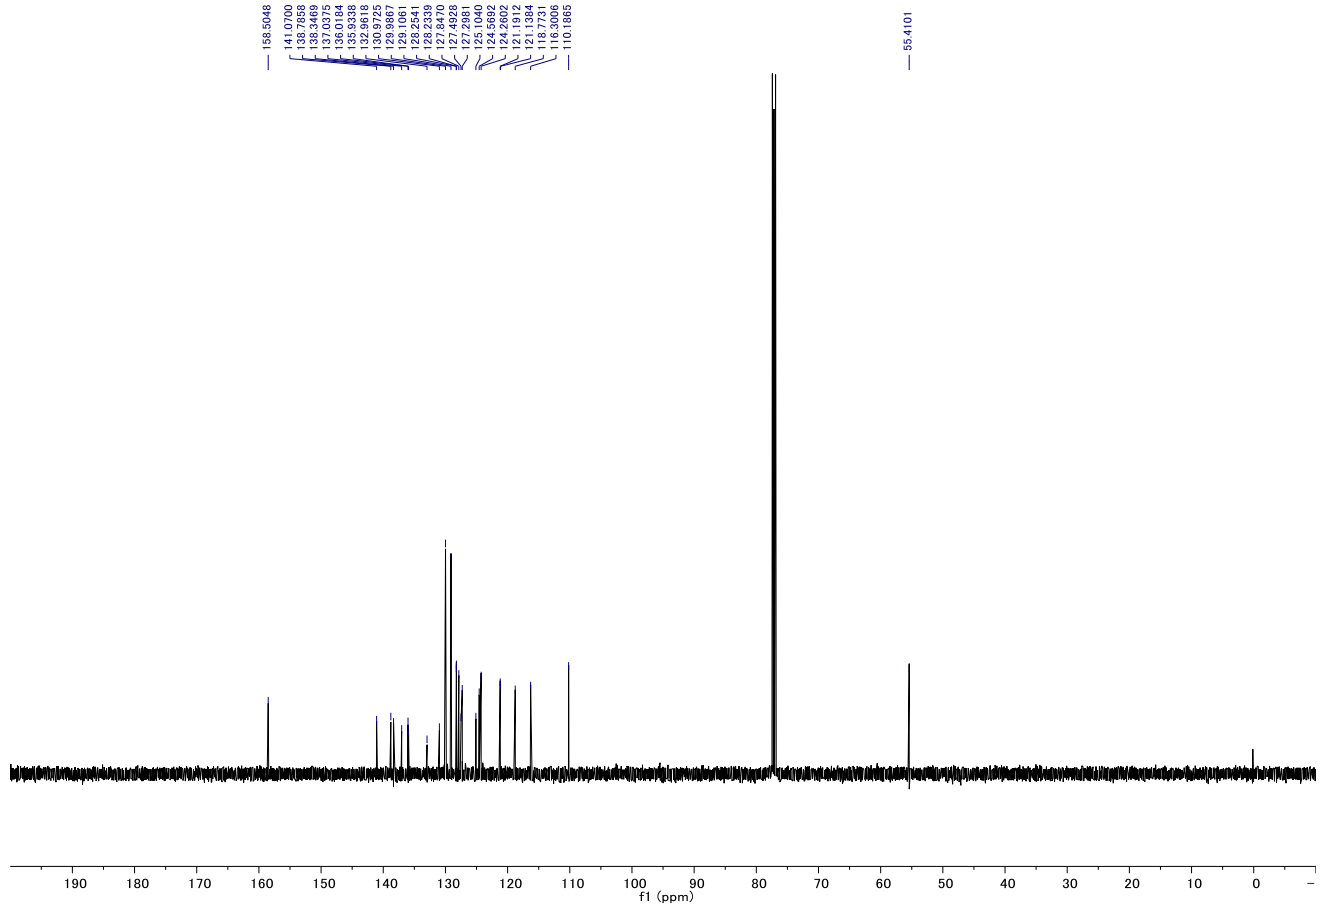

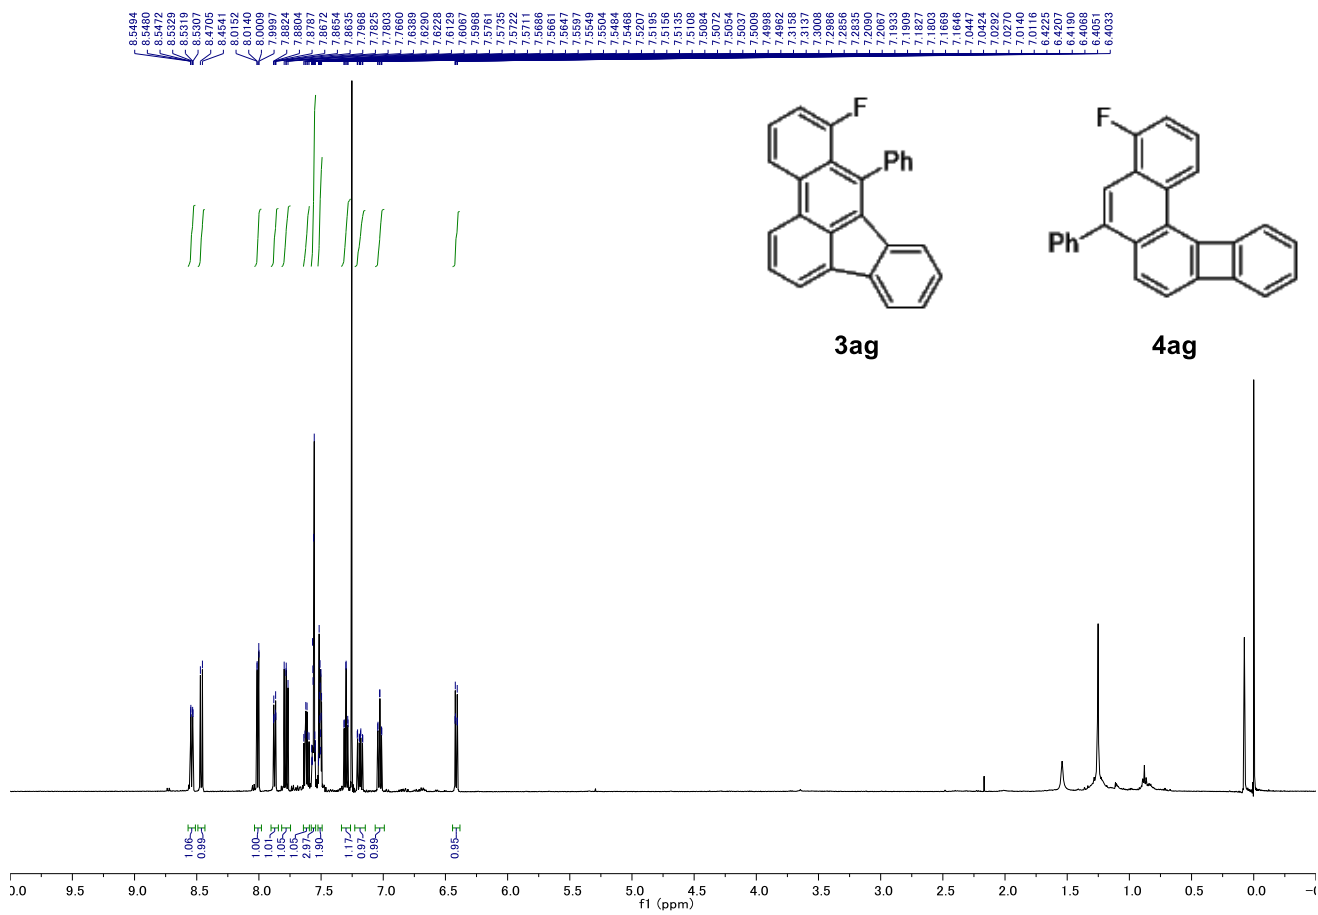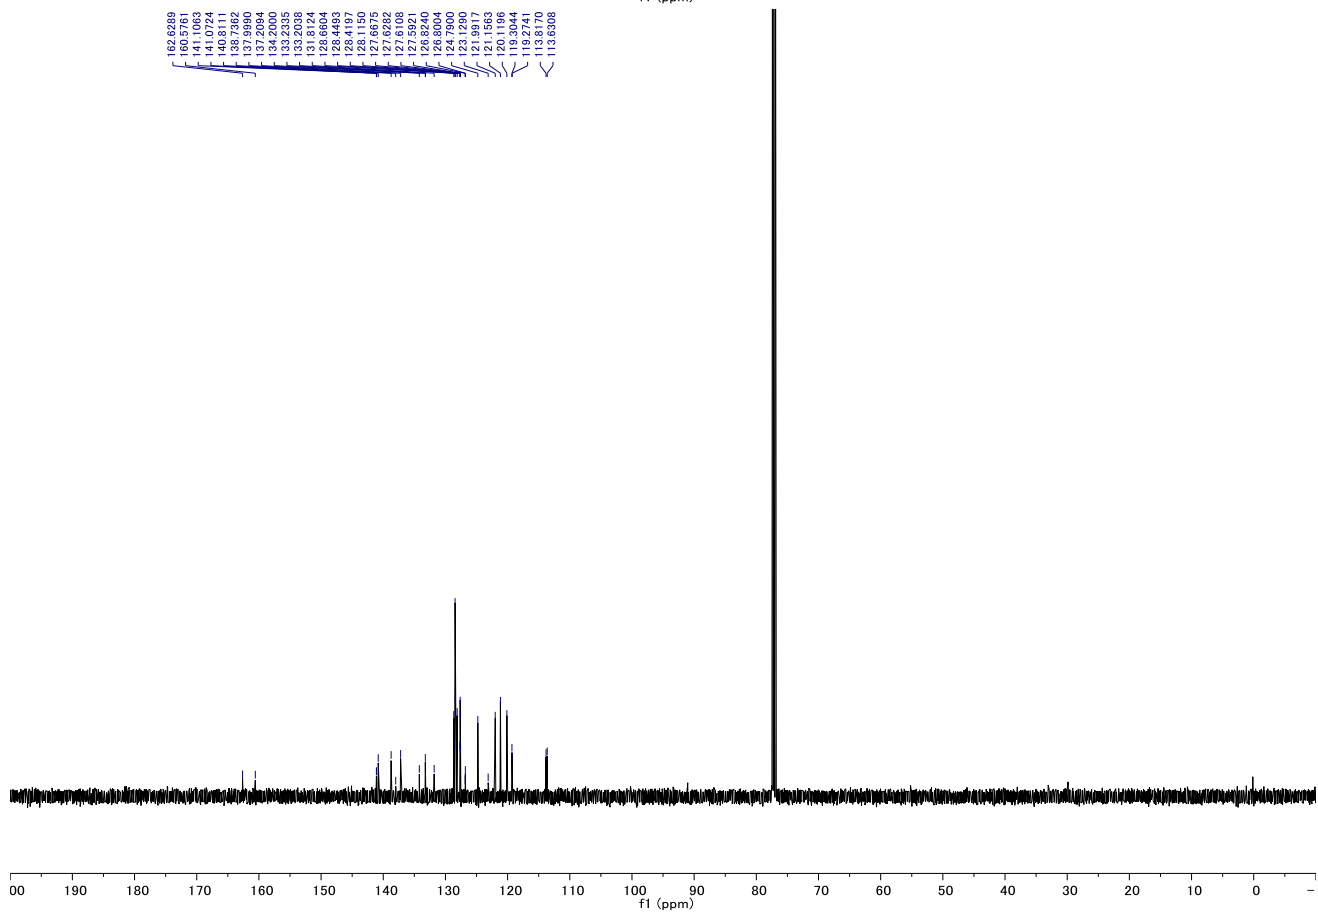



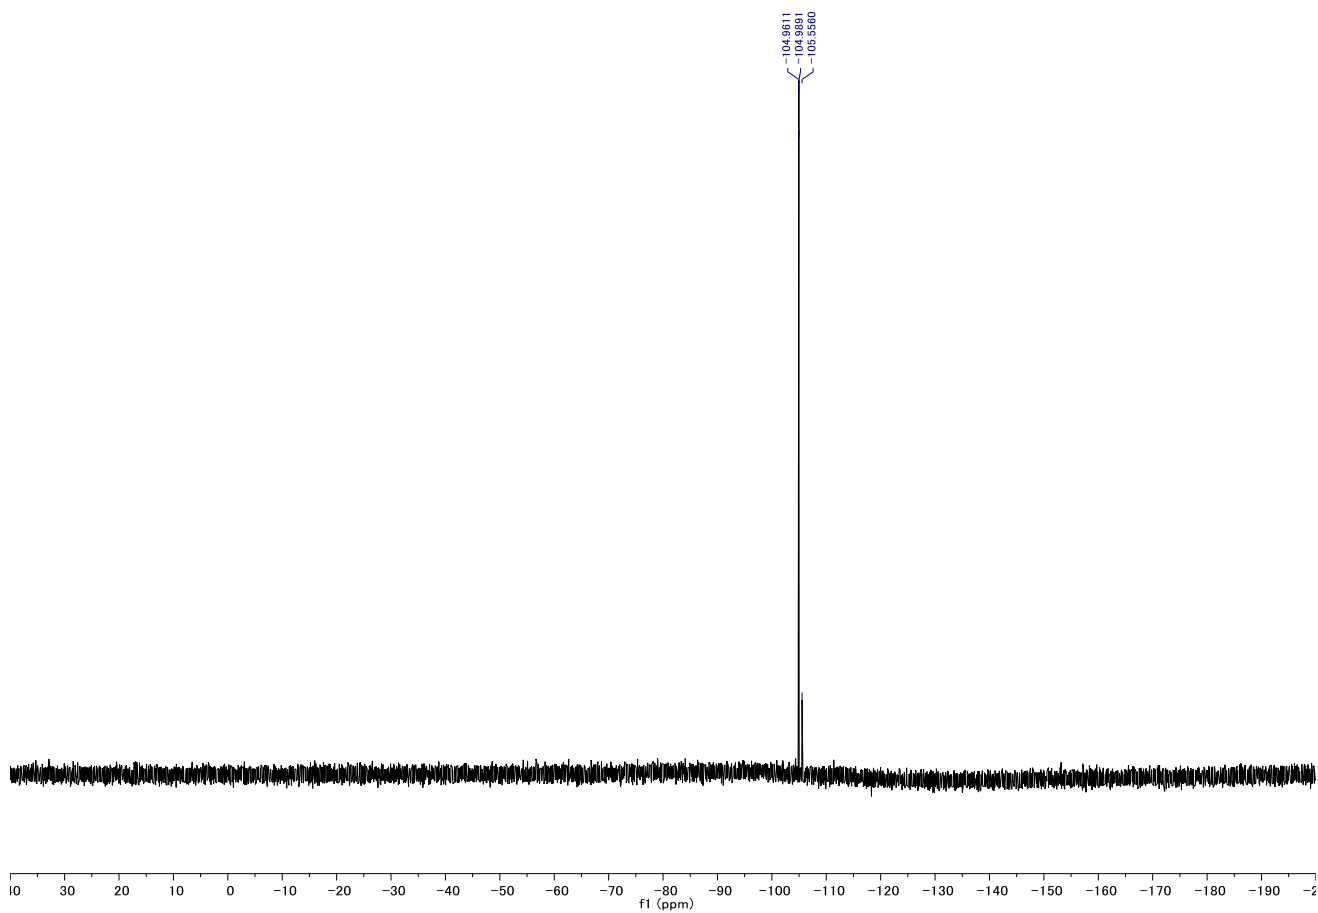

8.8046  
8.7867  
8.7846  
8.7451  
8.7303  
8.7289  
8.6180  
8.5922  
8.5364  
8.5201  
8.0735  
8.0686  
8.0671  
8.0542  
8.0468  
8.0358  
8.0328  
8.0278  
7.9469  
7.9335  
7.9301  
7.9113  
7.9106  
7.8884  
7.8864  
7.8706  
7.8539  
7.8521  
7.8231  
7.8205  
7.8064  
7.8034  
7.8029  
7.7871  
7.7727  
7.7585  
7.7554  
7.7544  
7.7029  
7.6913  
7.6880  
7.6867  
7.6654  
7.6710  
7.6642  
7.6613  
7.6582  
7.6552  
7.6037  
7.6088  
7.5985  
7.5976  
7.5936  
7.5833  
7.5803  
7.5773  
7.5755  
7.5725  
7.5697  
7.5641  
7.5316  
7.5296  
7.5196  
7.5148  
7.5120  
7.5006  
7.4981  
7.4858  
7.4539  
7.4520  
7.4500  
7.4480  
7.4380  
7.4360  
7.3017  
7.2886  
7.2866  
7.2736  
7.2716  
7.2094  
7.2057  
7.1942  
7.1442  
7.1340  
7.1304  
7.1286  
7.1196  
7.1129  
7.0405  
7.0382  
7.0251  
7.0231  
7.0097  
7.0075  
6.8231  
6.8215  
6.8172  
6.8172  
6.8143  
6.8047  
6.8019  
6.5919  
6.3711

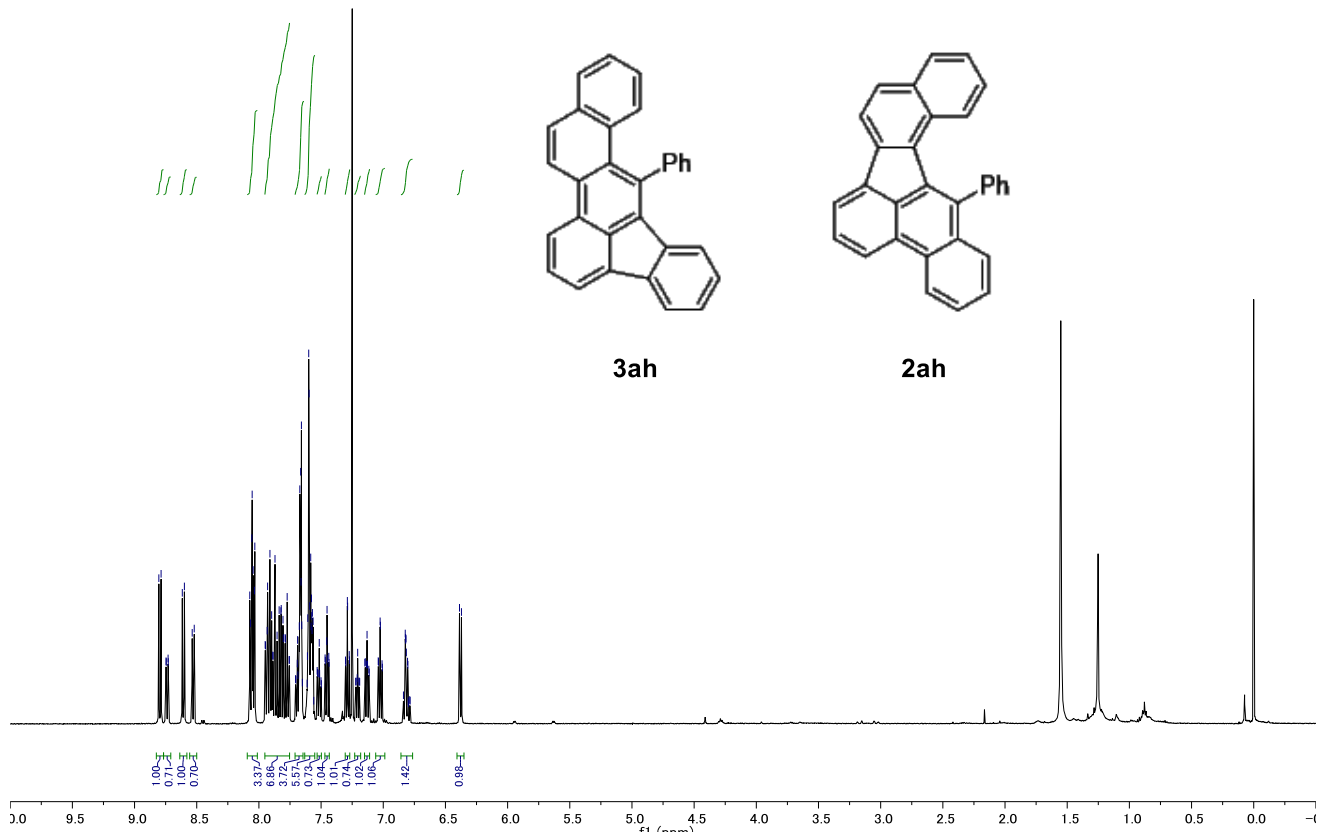

143.0476  
141.4275  
140.5676  
140.3635  
137.5211  
137.1229  
136.8142  
134.8694  
134.7788  
134.6427  
134.0582  
132.5330  
131.7016  
131.7066  
131.2244  
130.8572  
130.5751  
130.1912  
129.9292  
129.5706  
129.5706  
129.2733  
129.0778  
129.0131  
128.9111  
128.9271  
128.3412  
128.2083  
128.0952  
127.8989  
127.8989  
127.5034  
127.4572  
127.3472  
127.2747  
126.8340  
126.8113  
125.7392  
125.7246  
125.6443  
124.6443  
124.6033  
122.8310  
122.5506  
121.9147  
121.9155  
121.1952  
119.7656  
119.3480  
119.2450

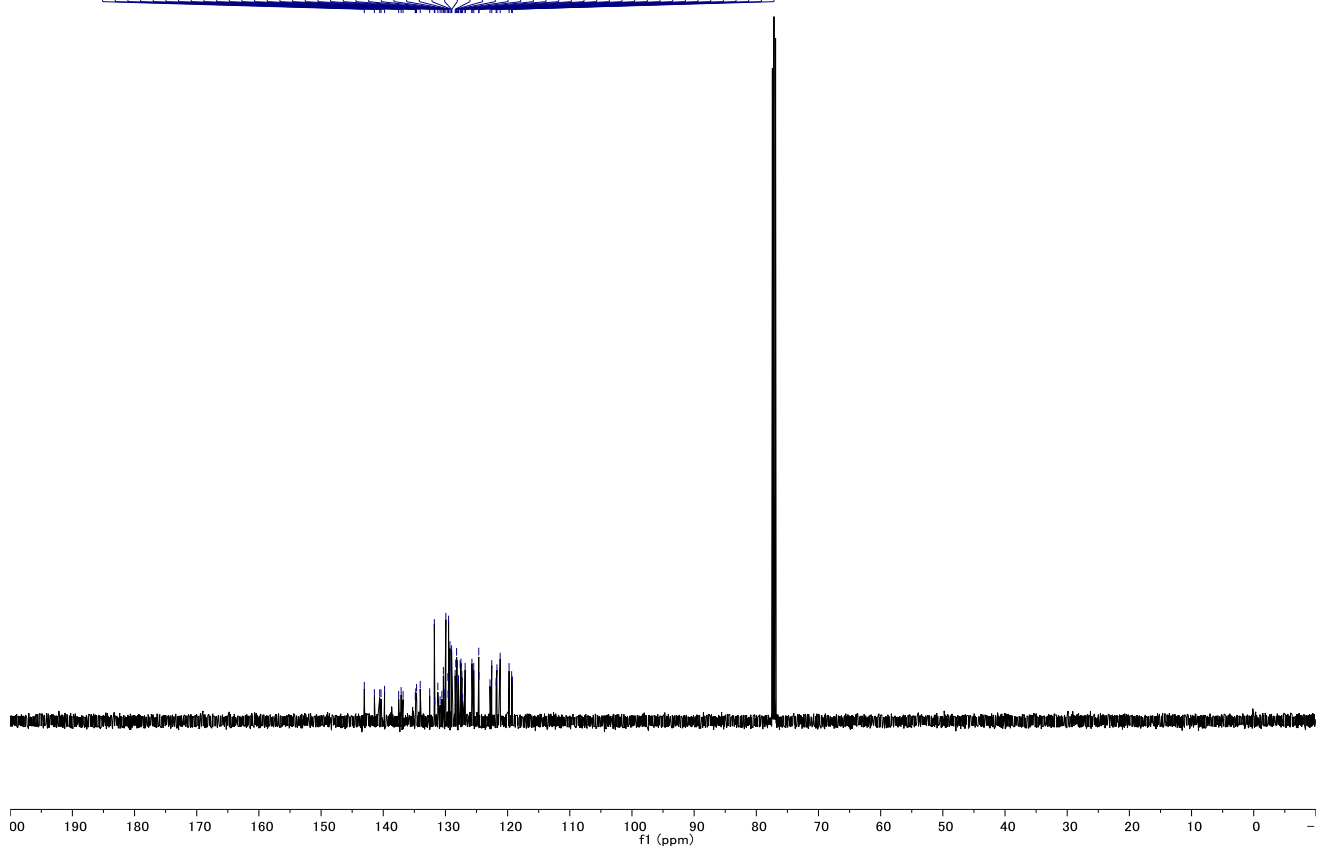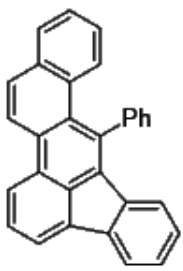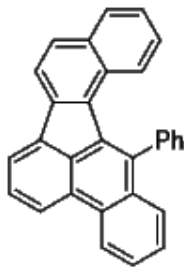

**3ah**

**2ah**

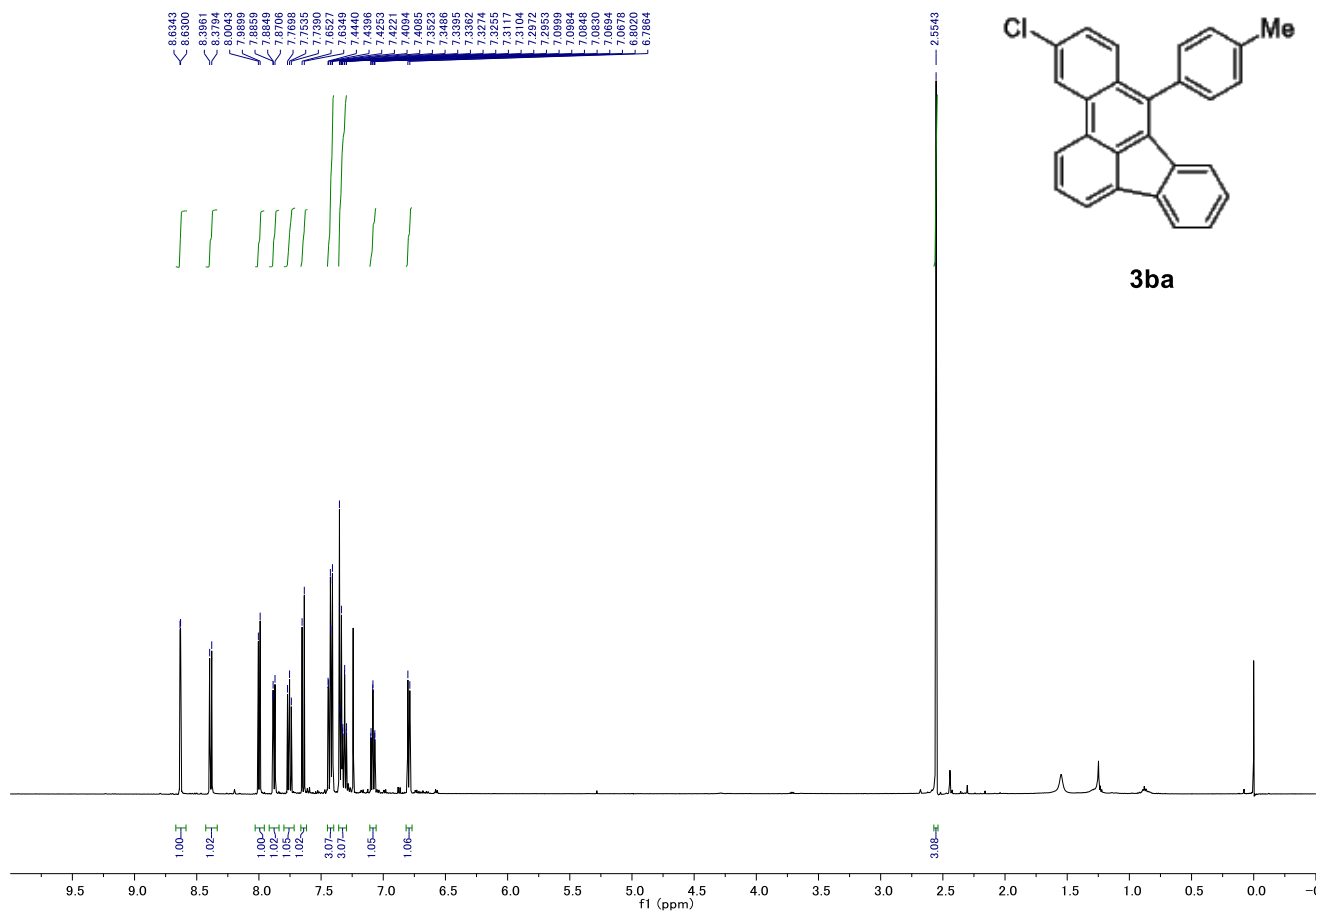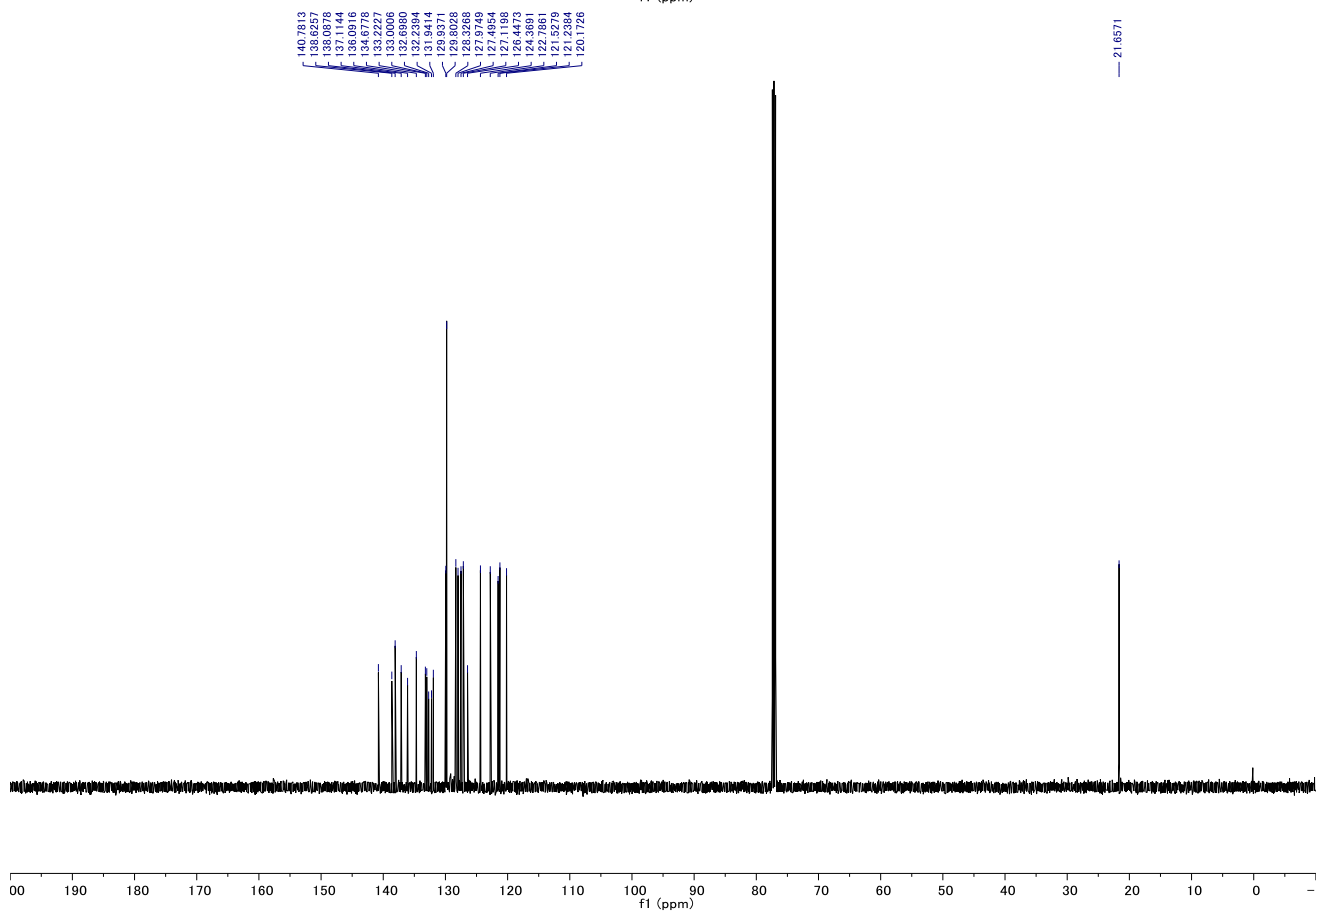

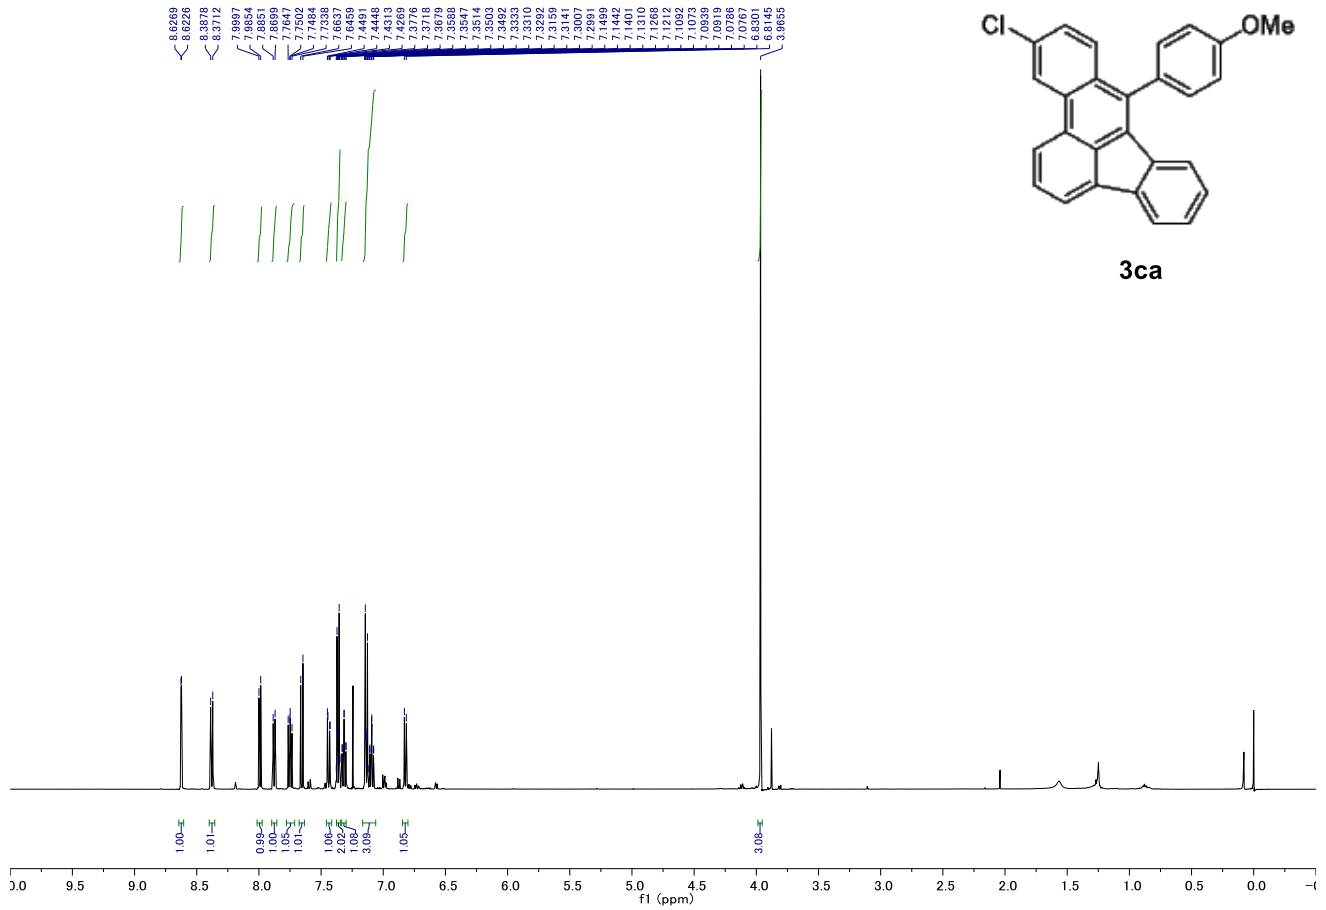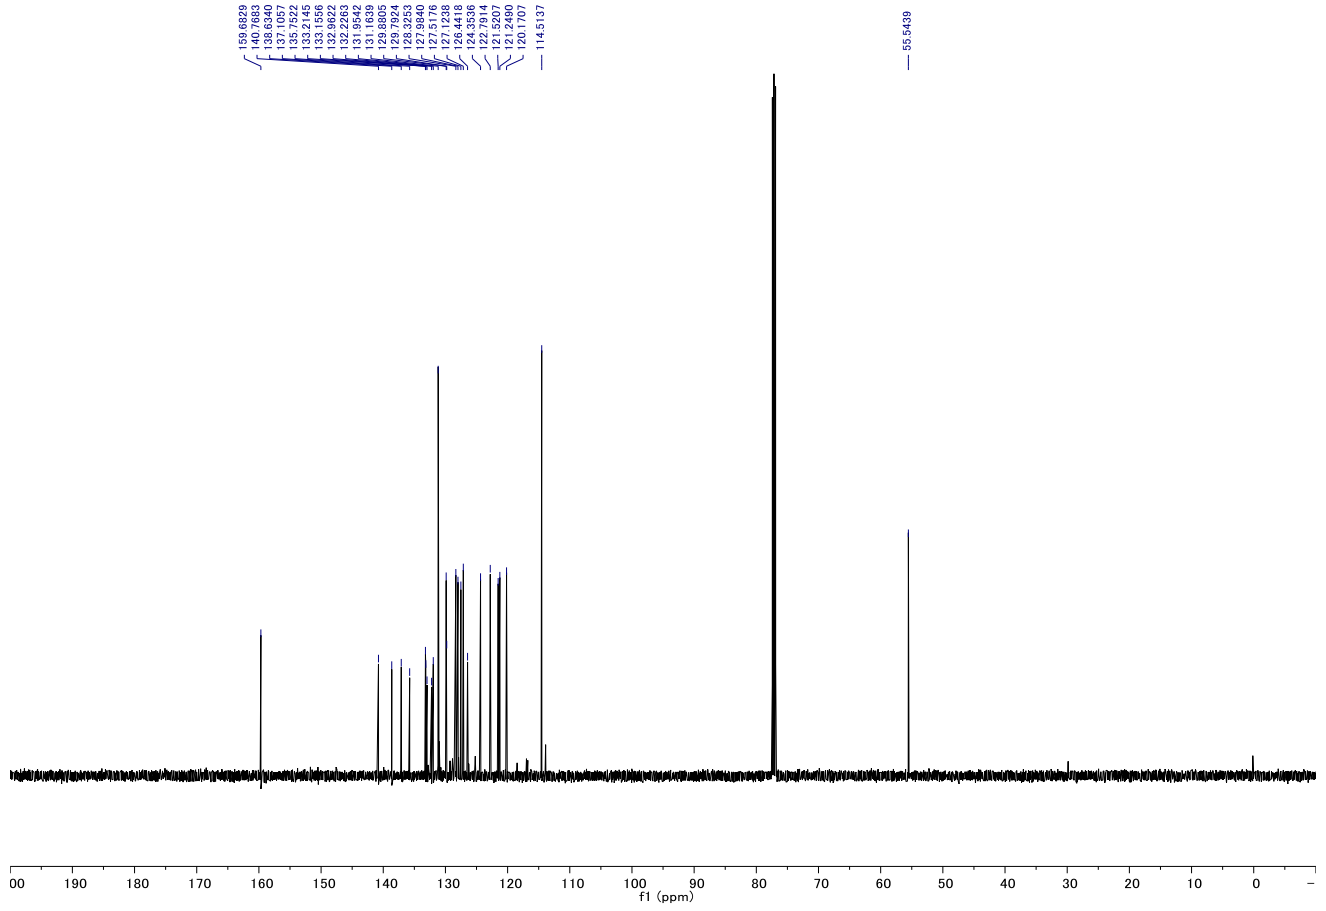

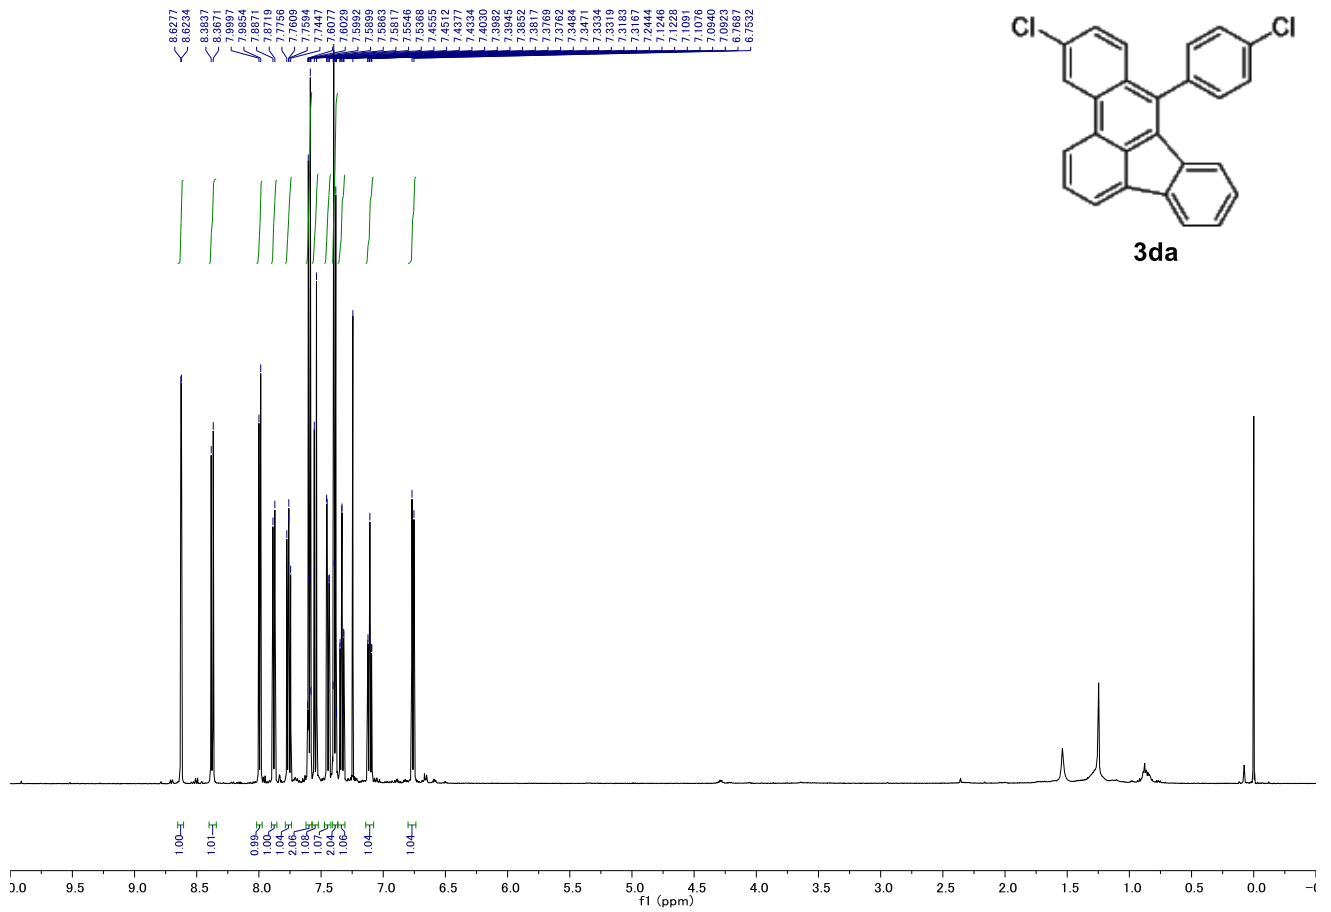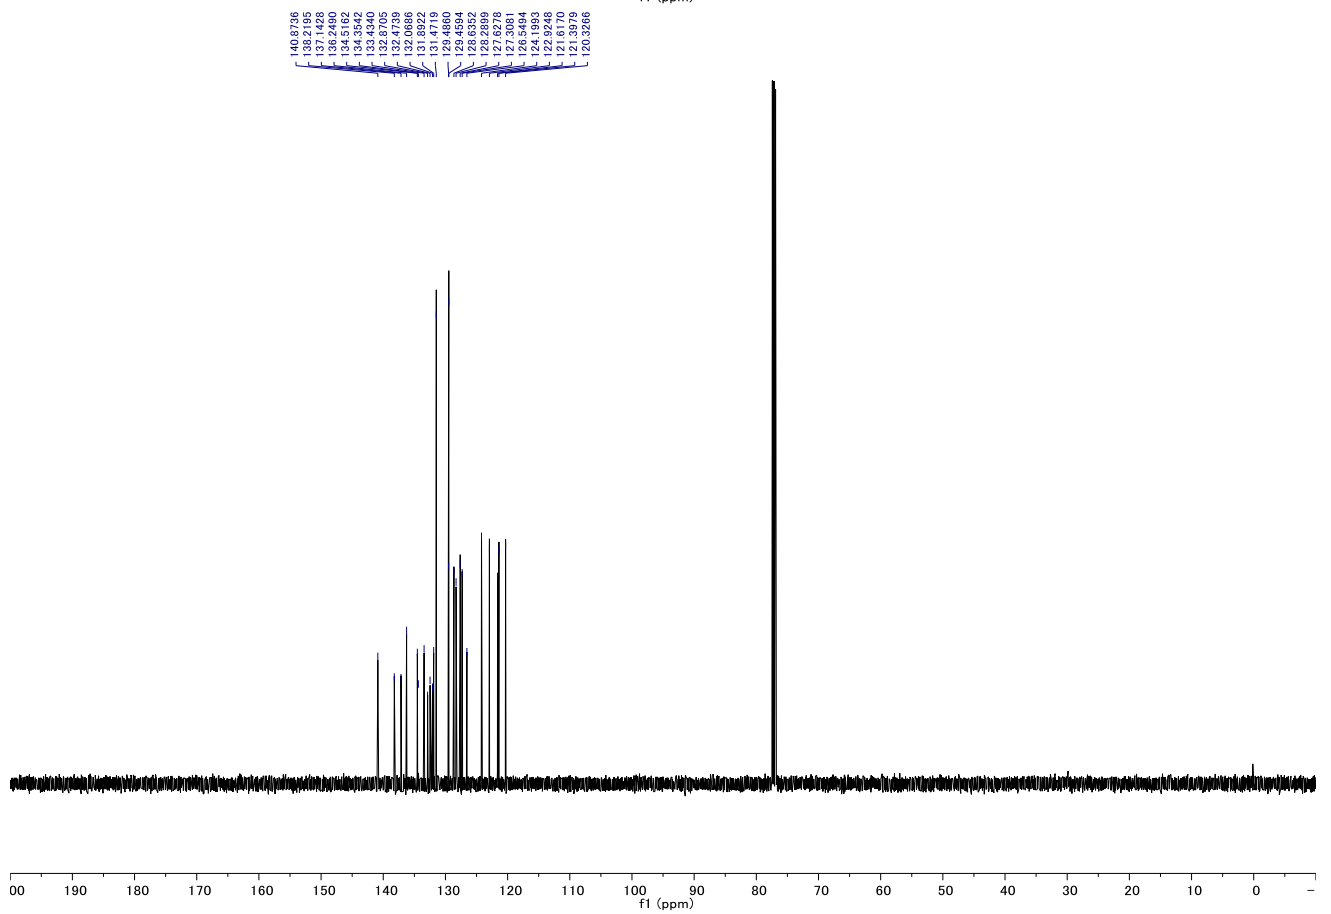

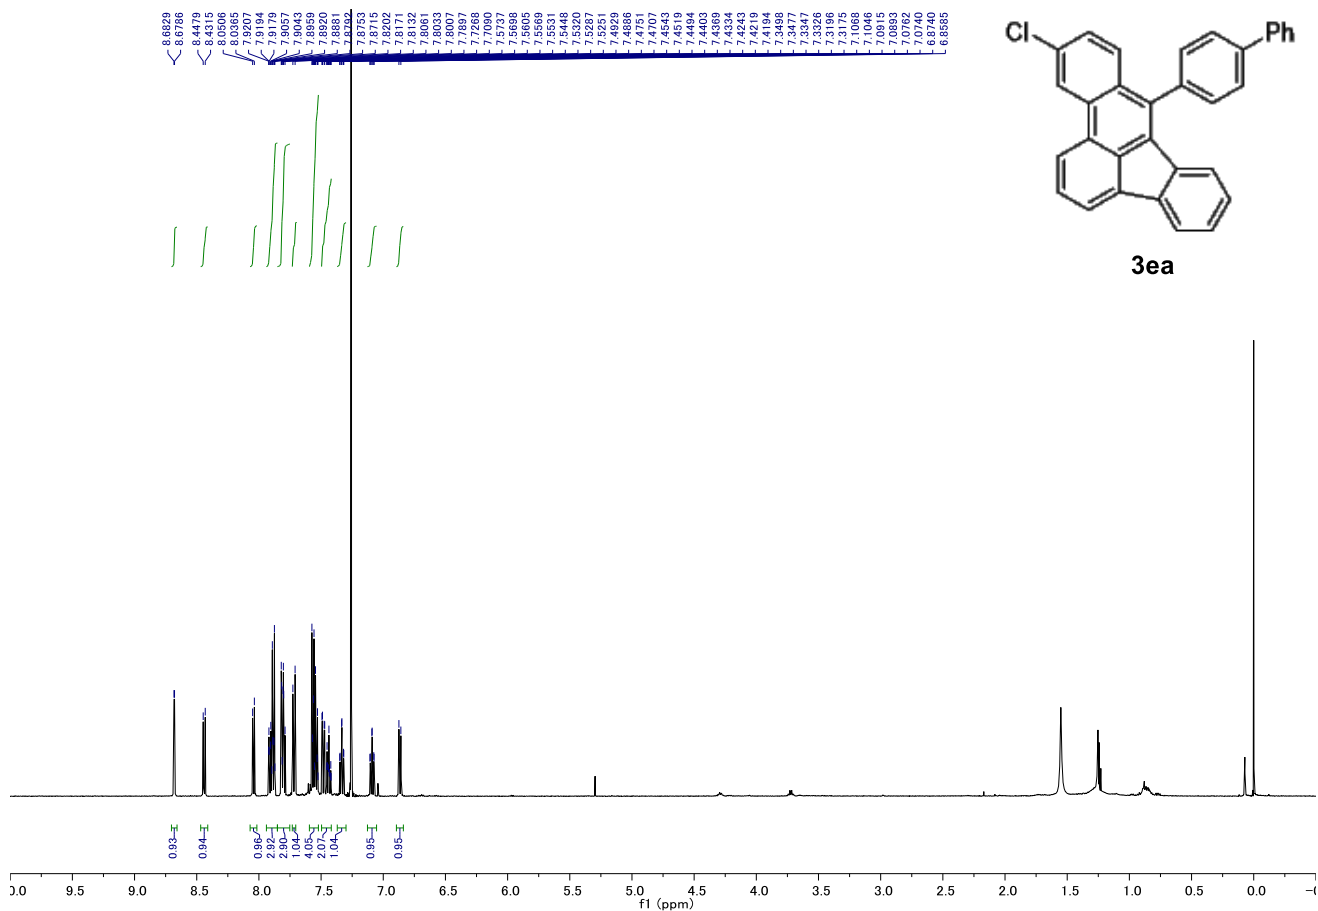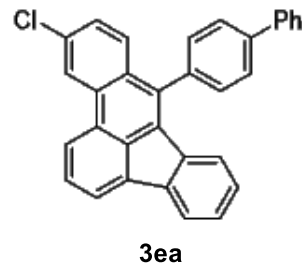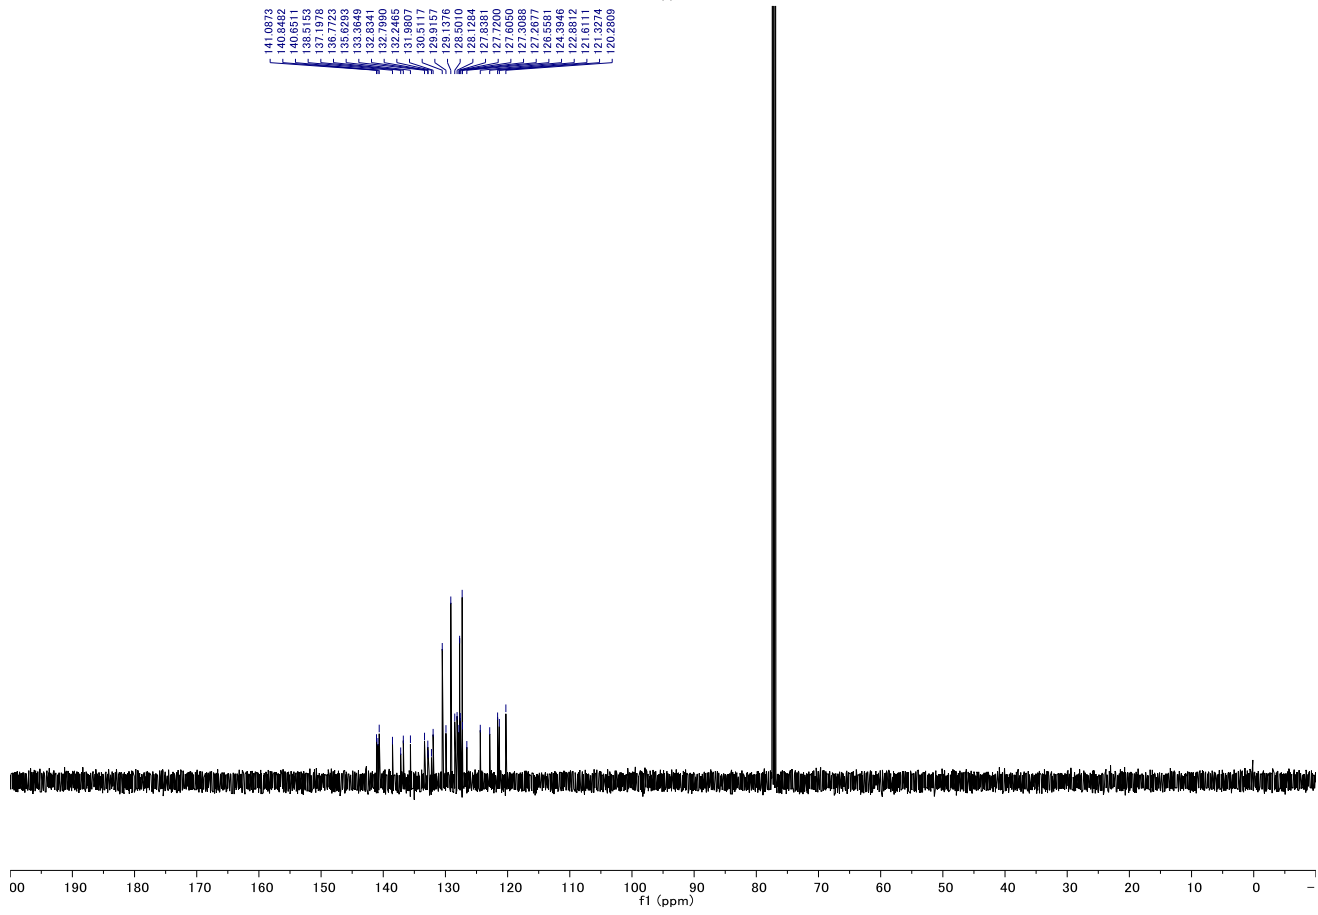

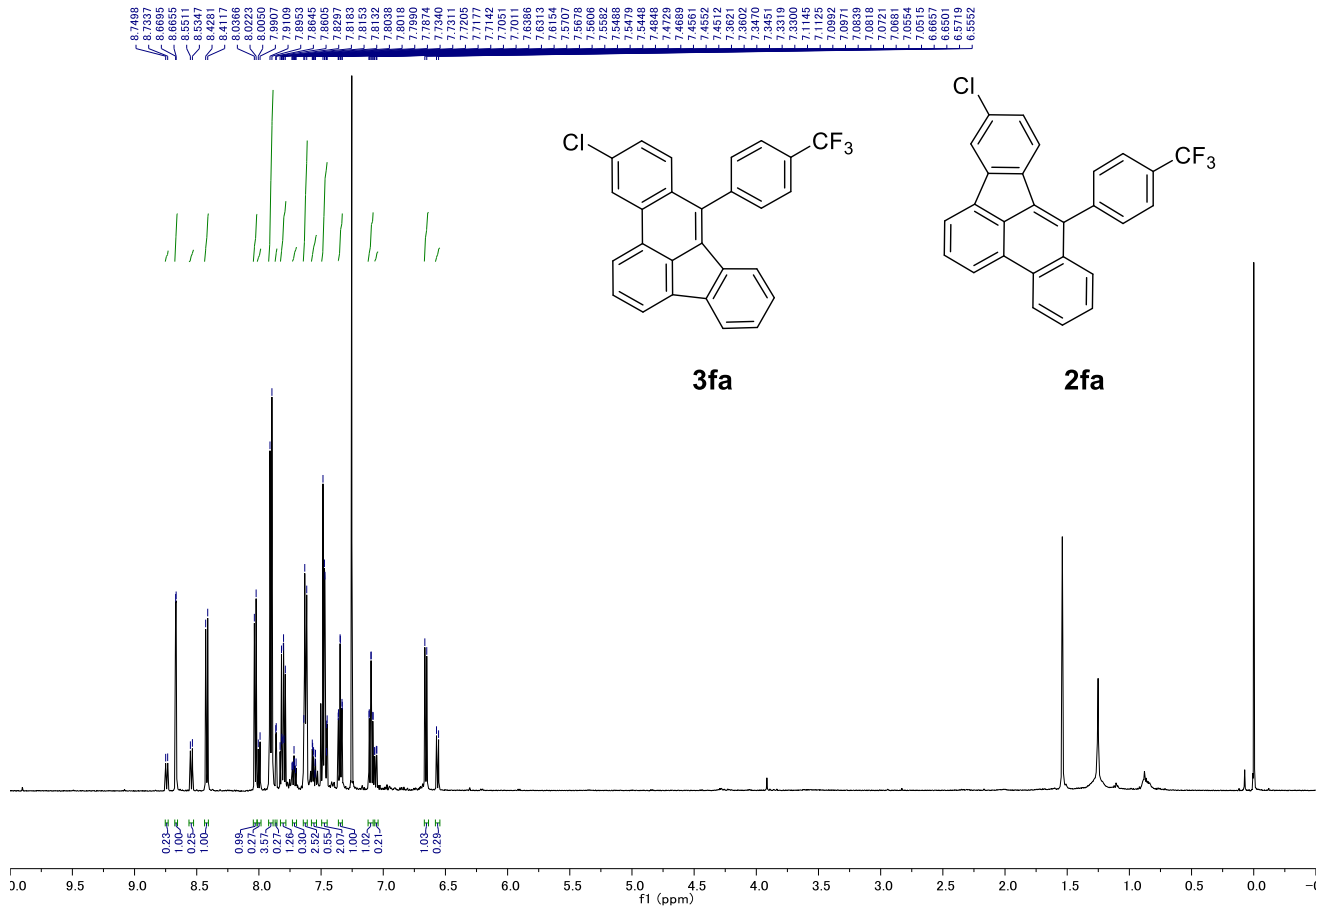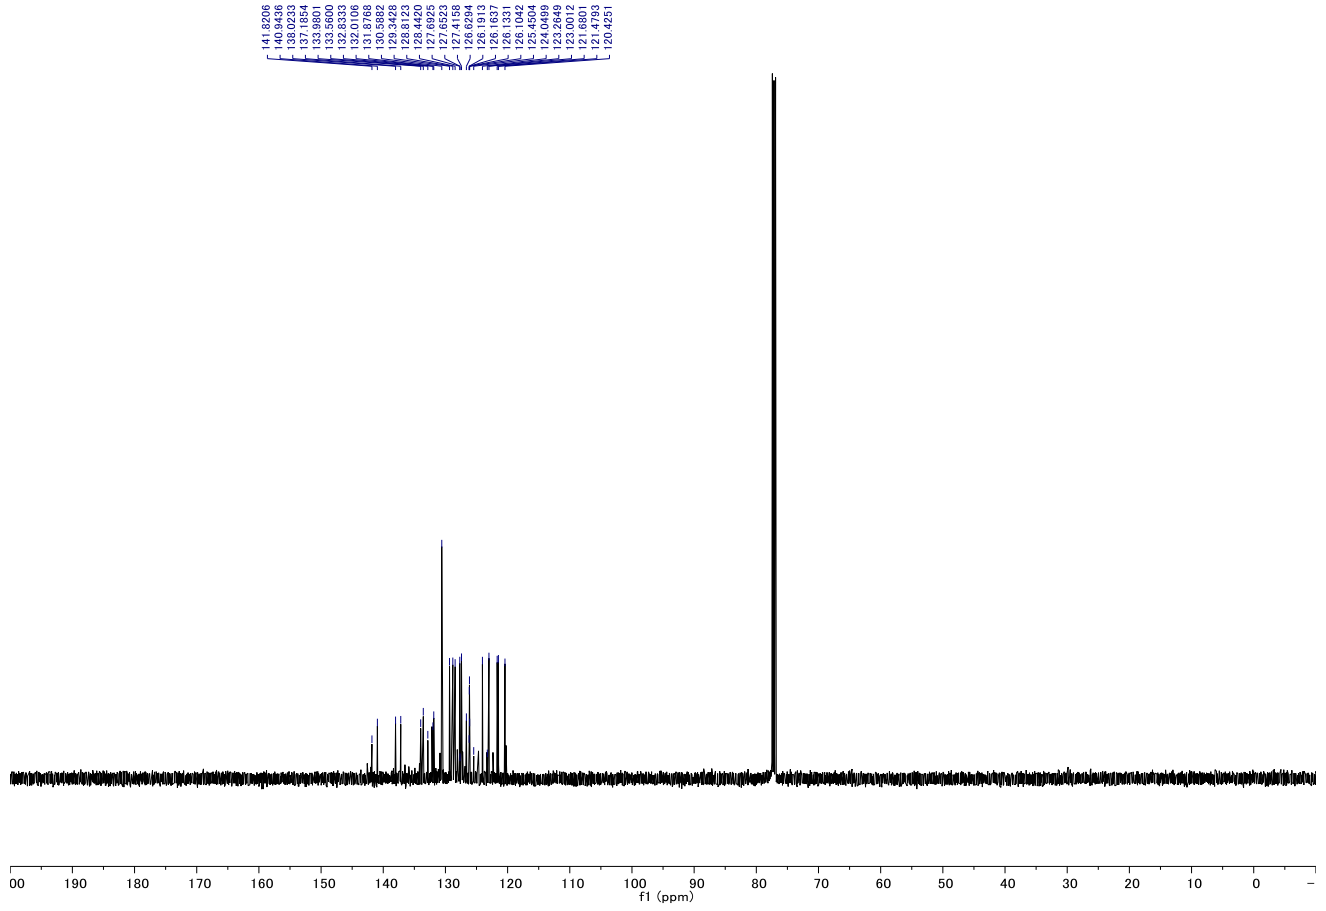

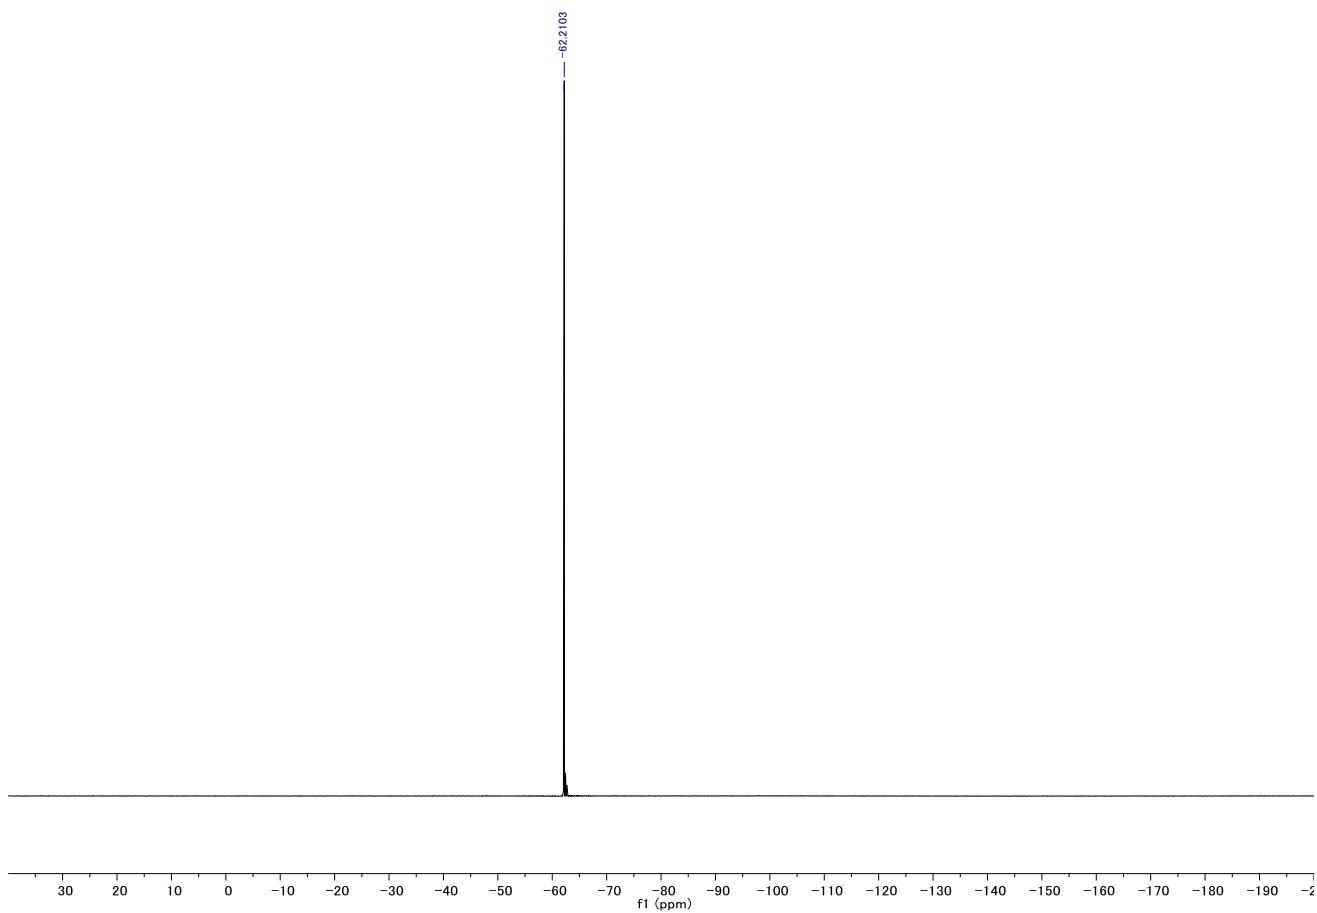



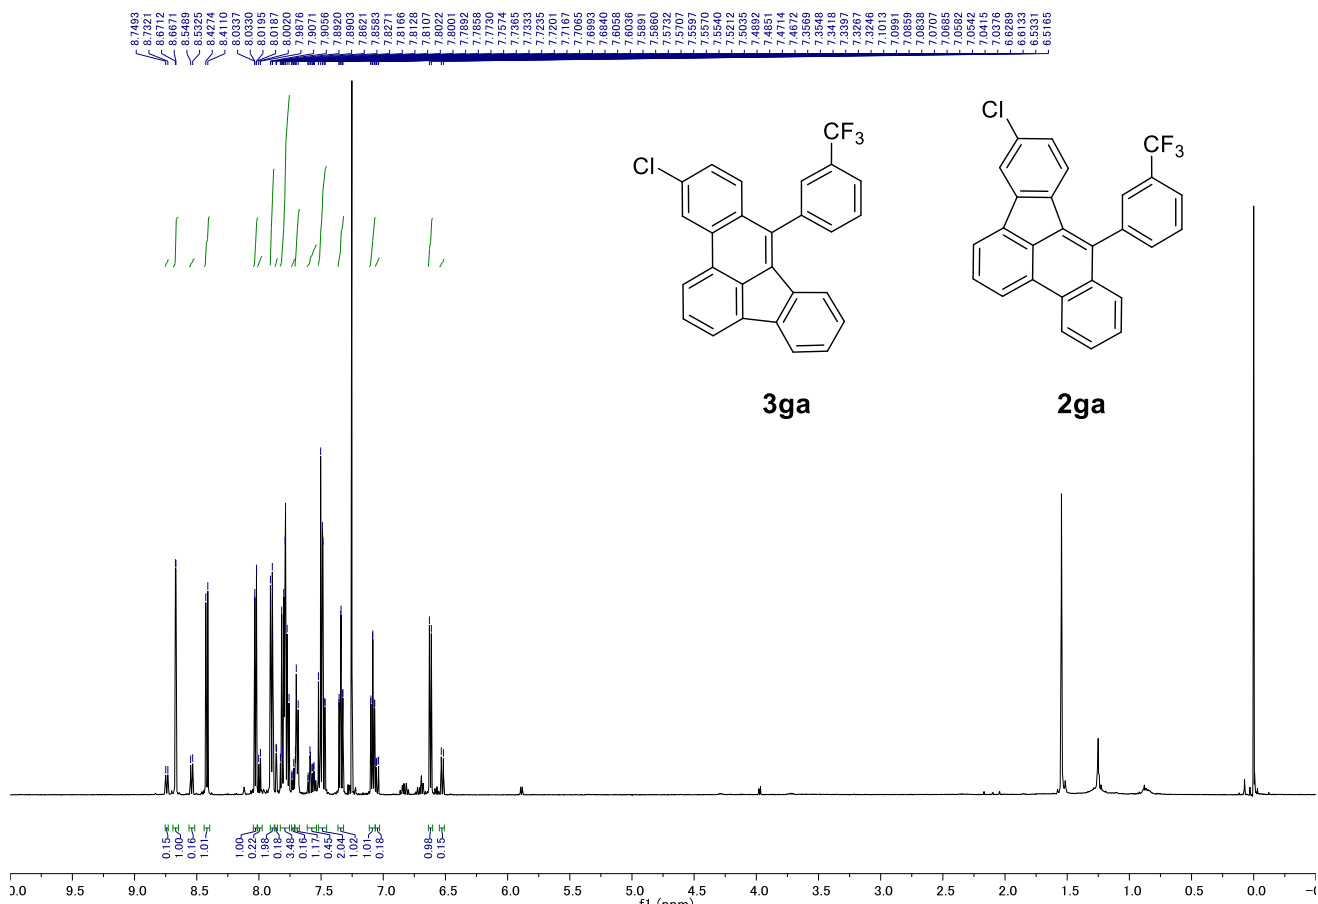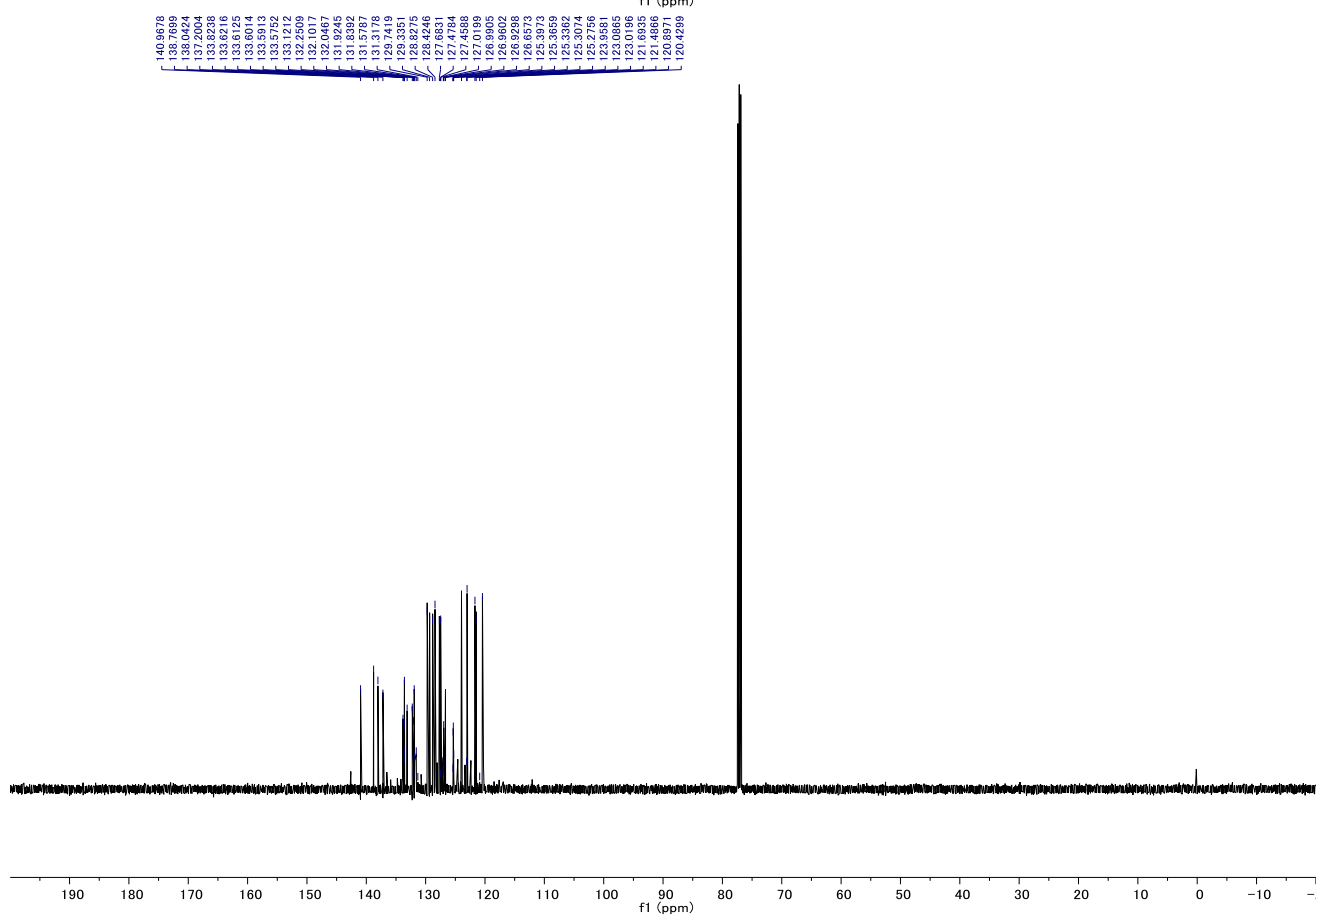

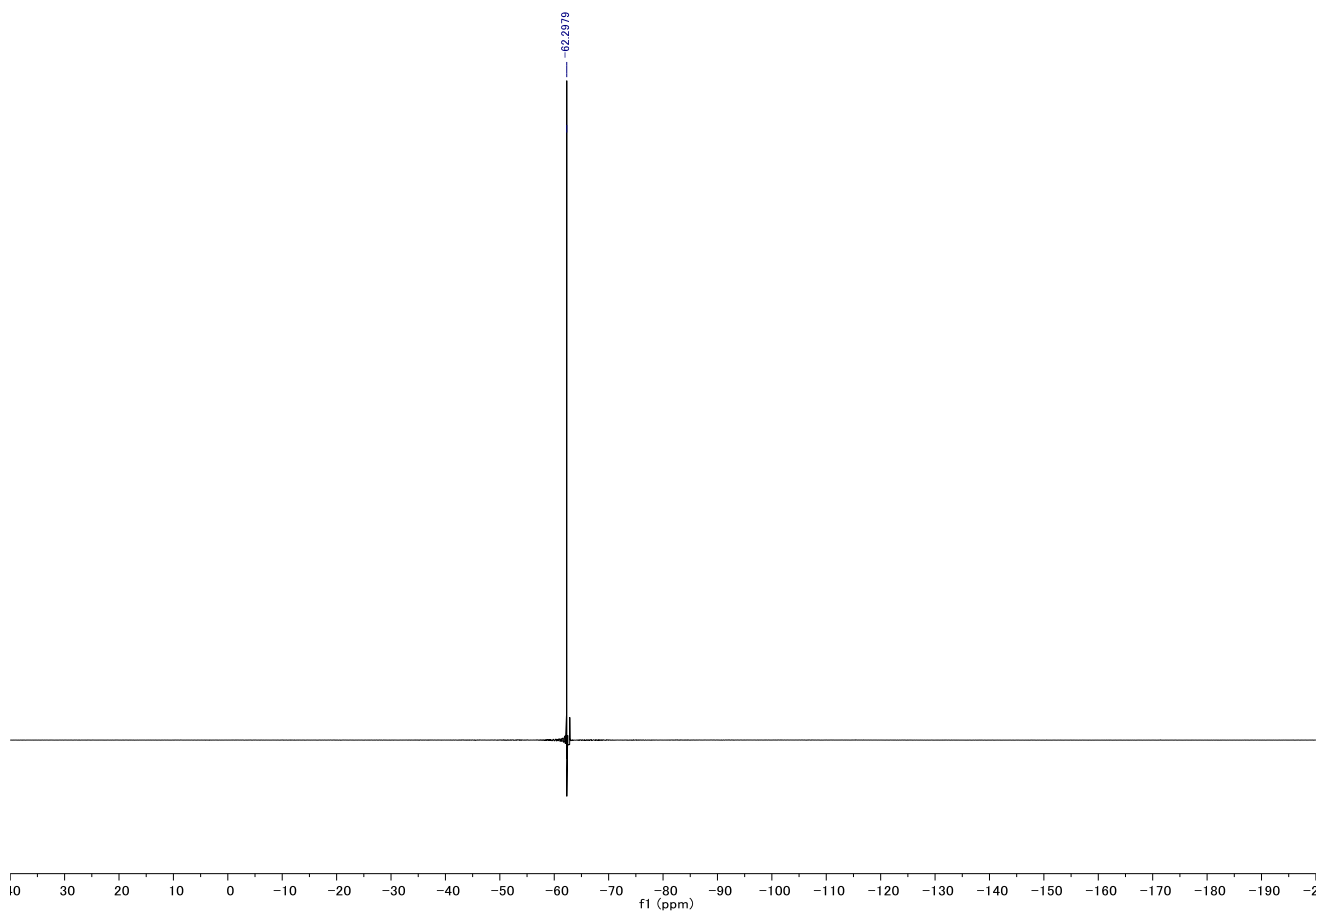

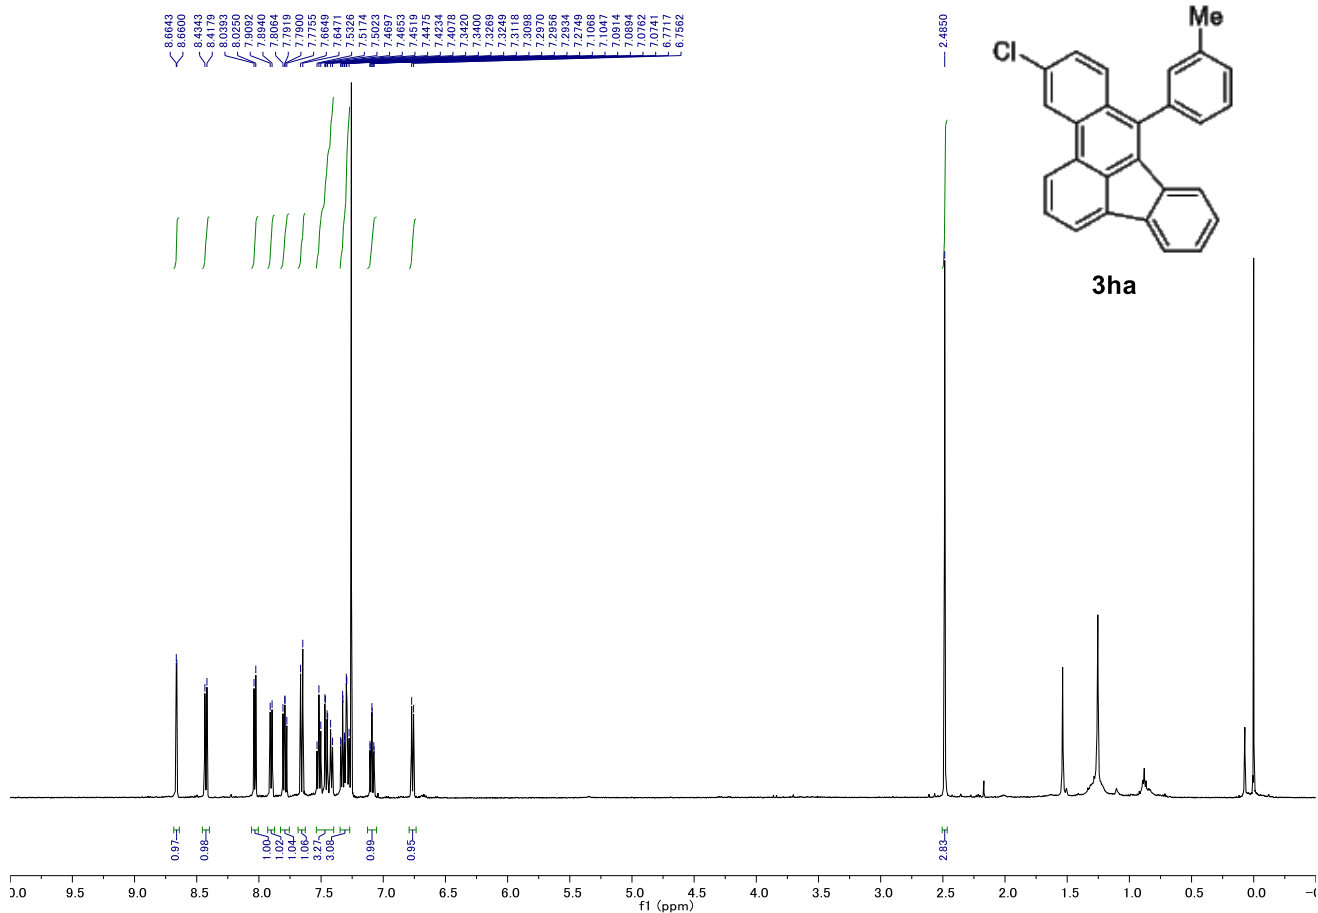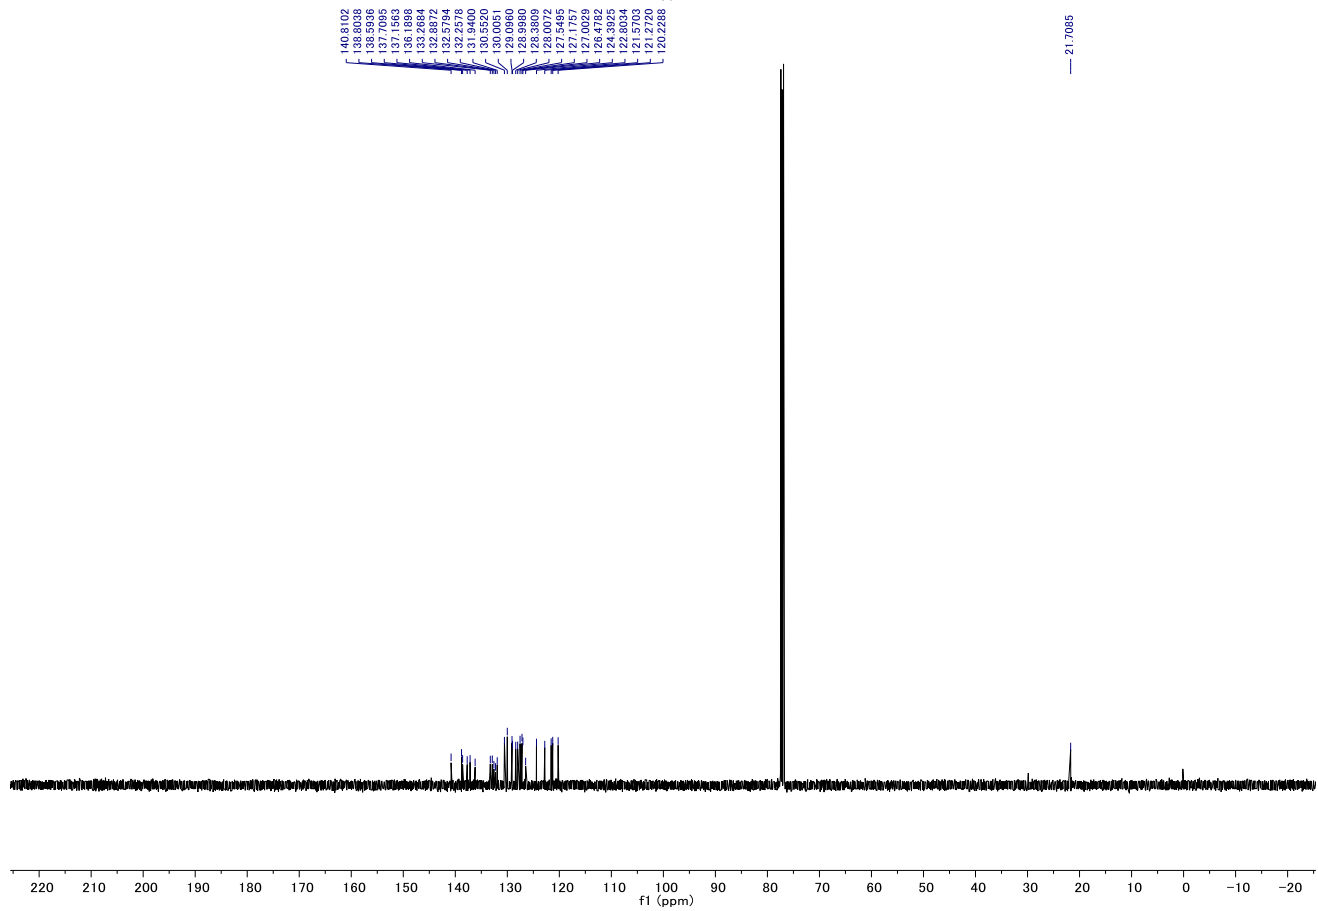

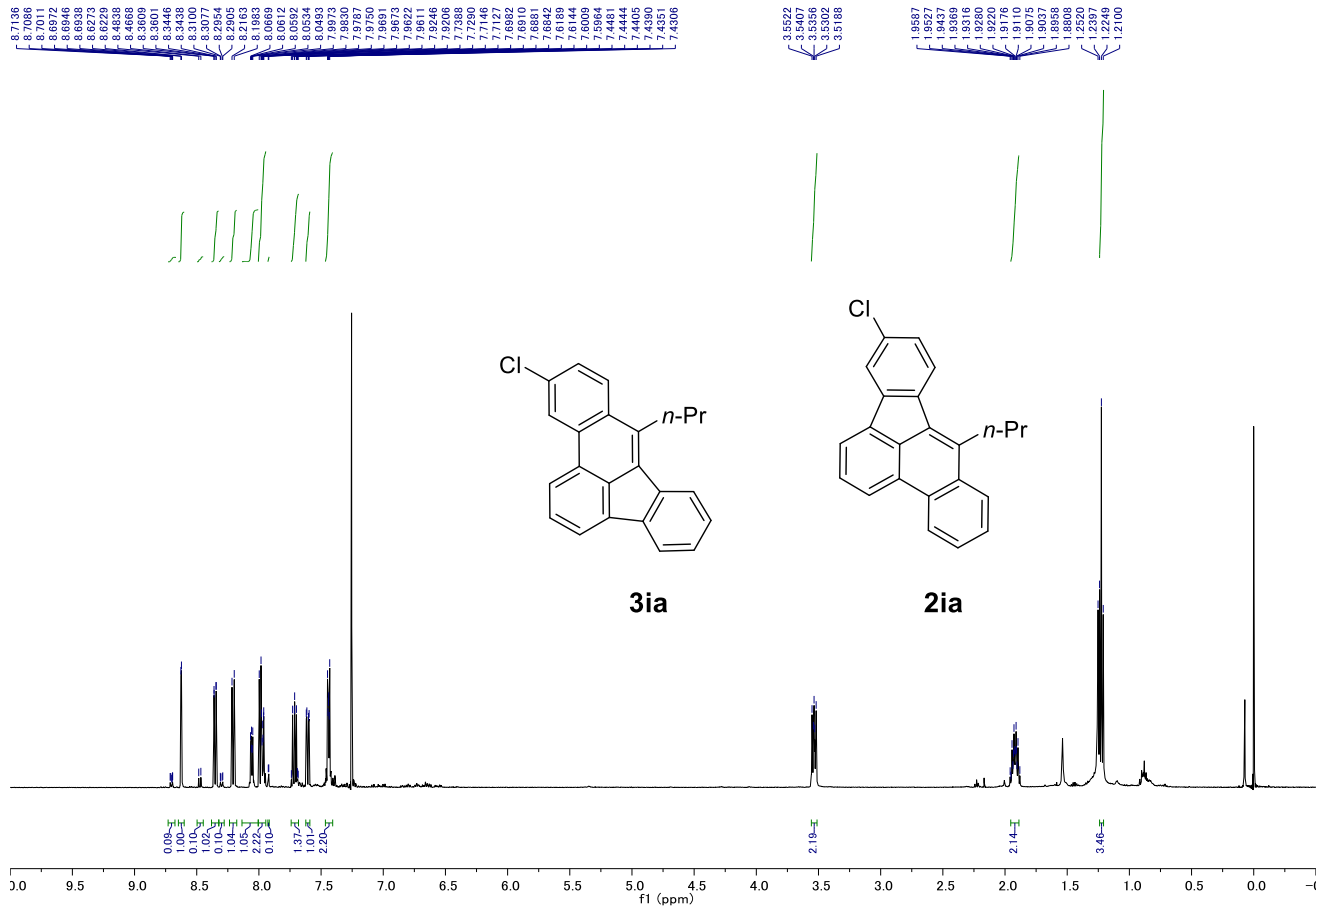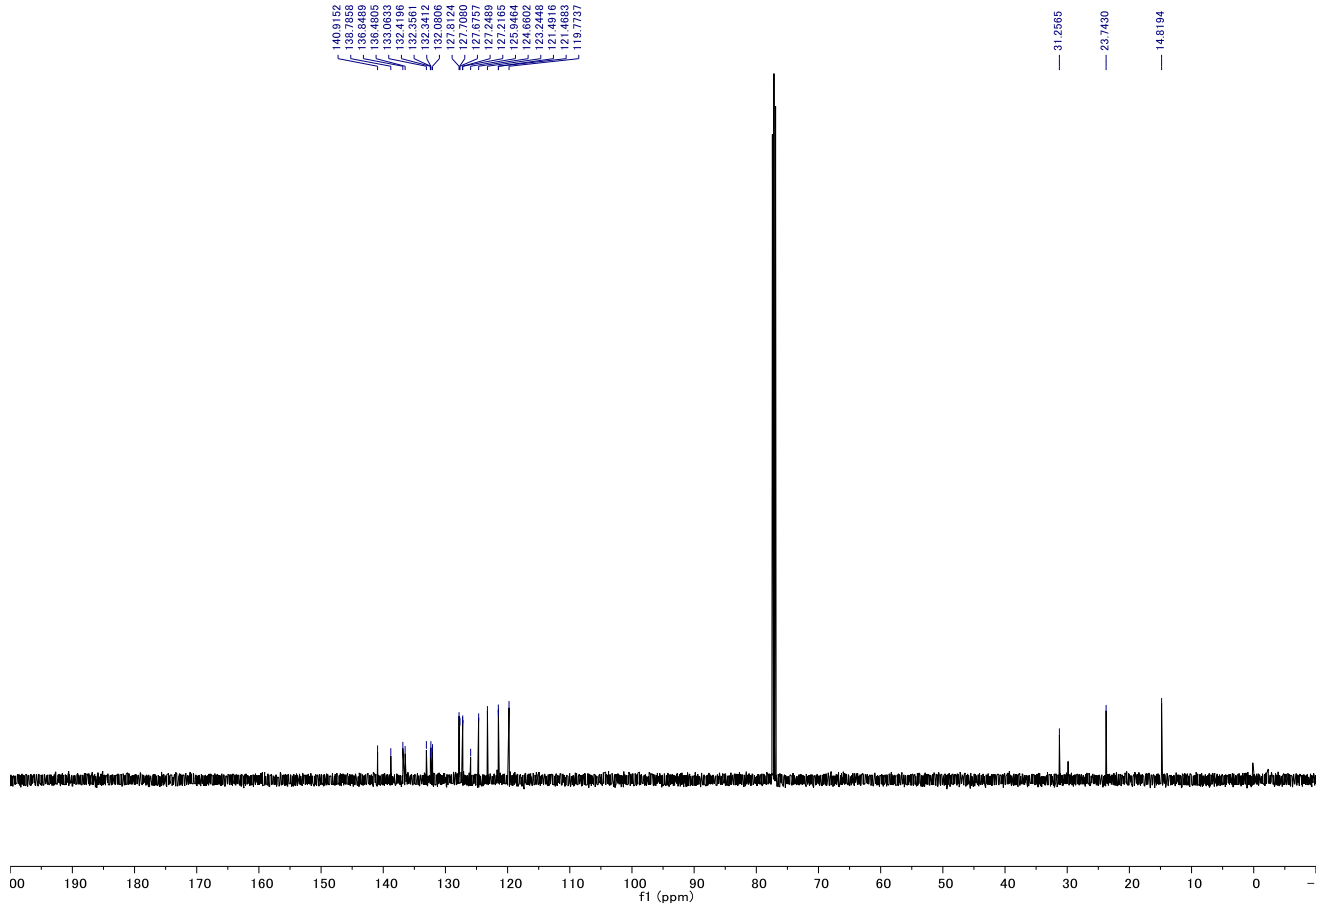

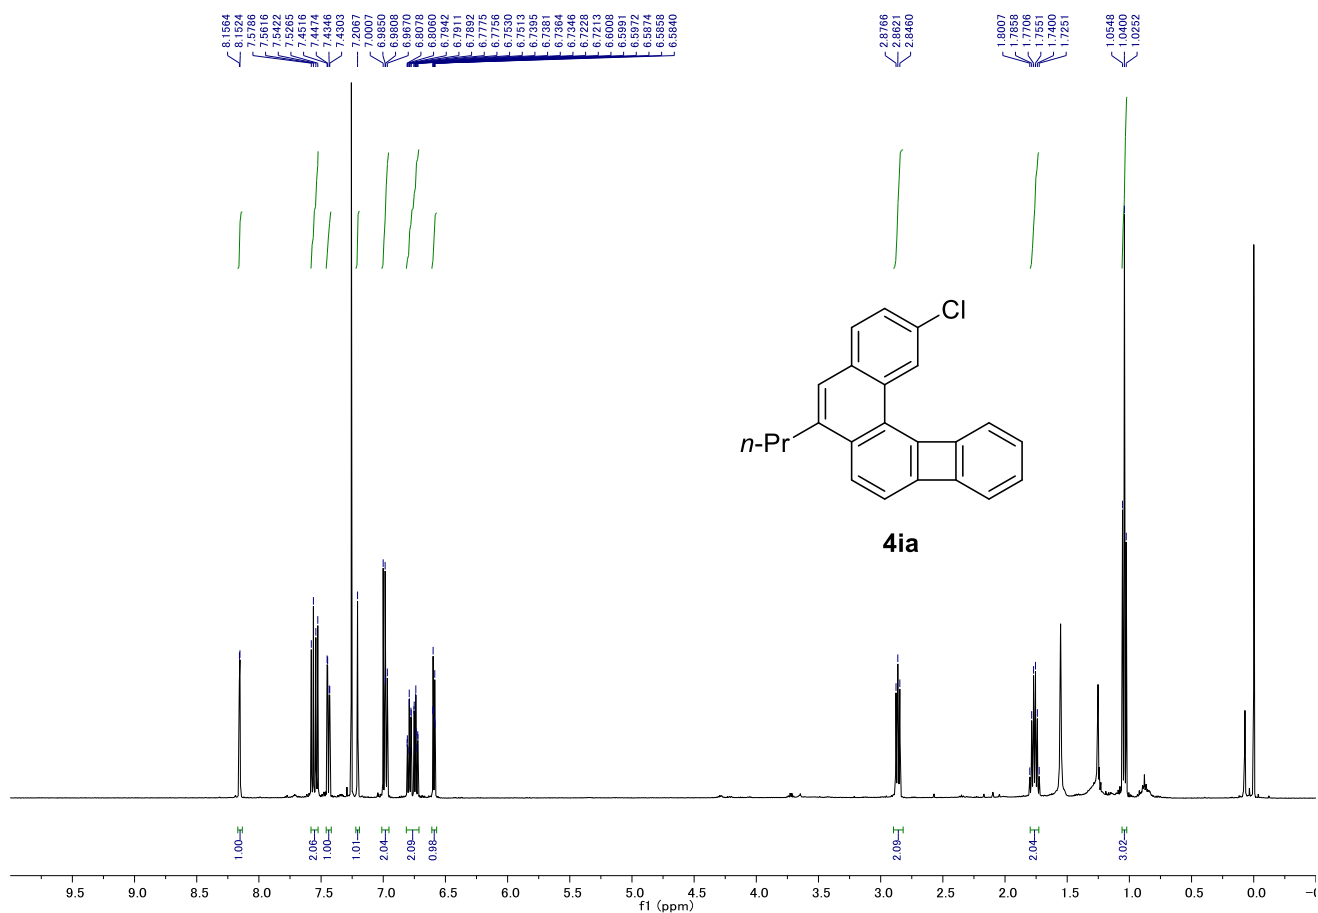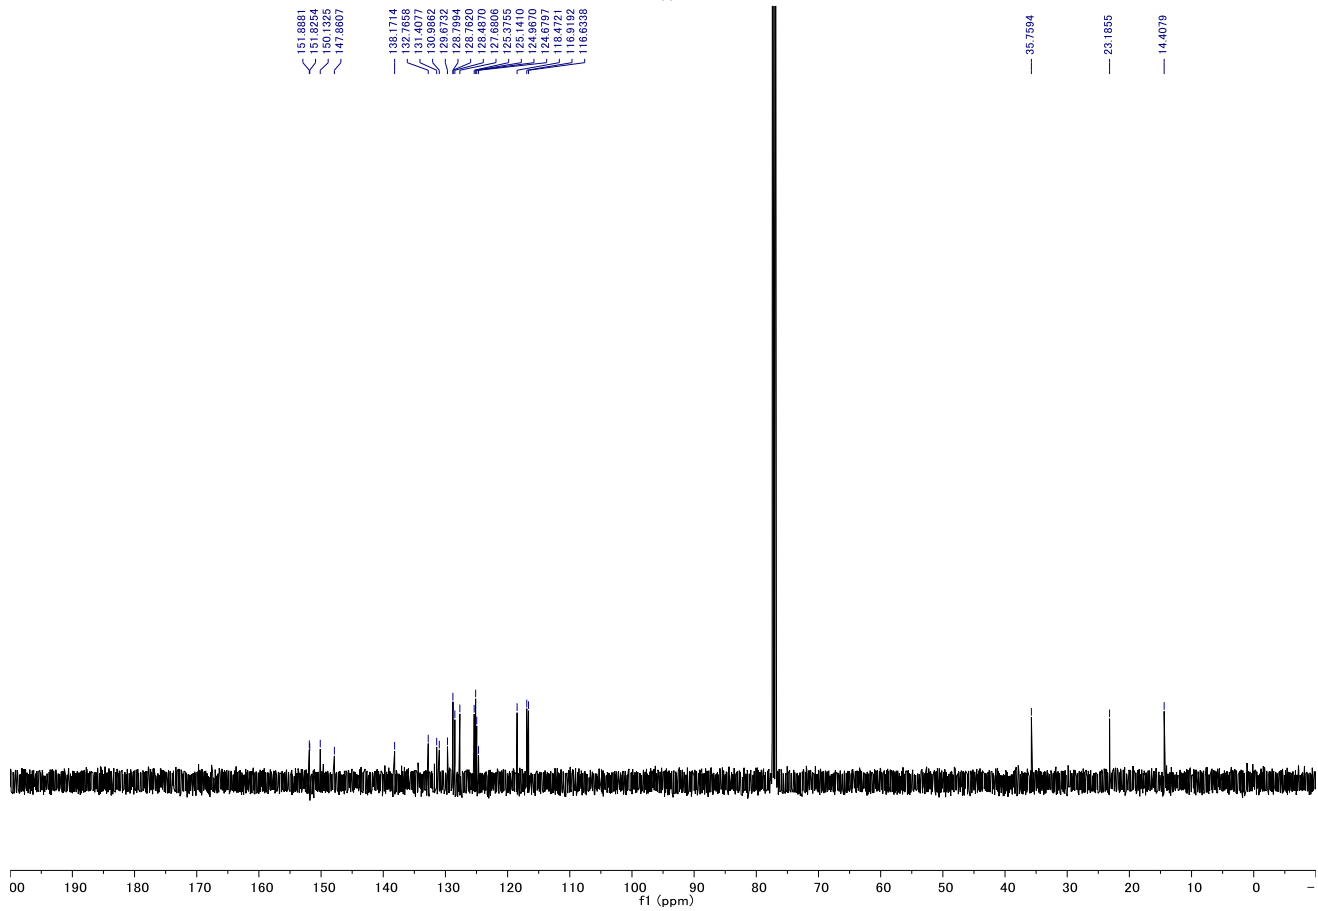

Supplement: d0ob01211d1.pdf [file d0ob01211d1.pdf]
